# Supplementary material
Source: PubMed Central journal article supplement (PMC7281785)

## Supporting Information

### Synthesis of Fluorescent Jasplakinolide Analogs for Live-Cell STED<sup>#</sup> Microscopy of Actin

Vladimir N. Belov<sup>a,c,\*</sup>, Stefan Stoldt,<sup>a</sup> Franziska Rüttger,<sup>b</sup> Michael John<sup>b</sup>, Jan Seikowski,<sup>c</sup> Jens Schimpfhauser,<sup>c</sup> and Stefan W. Hell<sup>a</sup>

<sup>a</sup> Department of Nanobiophotonics, Max Planck Institute for Biophysical Chemistry, Am Fassberg 11, 37077 Göttingen, Germany

<sup>b</sup> Institut für Organische und Biomolekulare Chemie, Tammannstrasse 2, 37077 Göttingen, Germany

<sup>c</sup> Facility for Synthetic Chemistry, Max Planck Institute for Biophysical Chemistry, Am Fassberg 11, 37077 Göttingen, Germany

<sup>#</sup> STED: Stimulated Emission Depletion

## Table of Contents

|                                                             |     |
|-------------------------------------------------------------|-----|
| Cell culture and <i>in vitro</i> labeling                   | S3  |
| Live-cell STED microscopy                                   | S3  |
| HPLC traces and ESI-MS data                                 | S4  |
| NMR spectra (tables with signal assignments and structures) | S9  |
| Copies of NMR spectra (with structures)                     | S24 |

## **1. Cell culture and *in vitro* labelling of actin in living U-2 OS and COS-7 cells**

The human Osteosarcoma cell line U-2 OS was obtained from the European Collection of Authenticated Cell Cultures (ECACC, Porton Down, Salisbury, UK; Cat no. 92022711, Lot. 17E015). U-2 OS cells were cultivated in McCoy's medium (Thermo Fisher Scientific, Waltham, MA, USA) supplemented with 10 % (v/v) fetal bovine serum (Thermo Fisher Scientific, Waltham, MA, USA), 1 % (v/v) sodium pyruvate (Sigma Aldrich, St. Louis, MO, USA) and Penicillin-Streptomycin (Sigma Aldrich, St. Louis, MO, USA).

The COS-7 cell line, which is a kidney cell line derived from the African green monkey, was obtained from the European Collection of Authenticated Cell Cultures (ECACC, Porton Down, Salisbury, UK; Cat no. 87021302, Lot. 05G008). COS-7 cells were cultivated in DMEM, high glucose, pyruvate Medium (Thermo Fisher Scientific, Waltham, MA, USA) supplemented with 10 % (v/v) fetal bovine serum (Thermo Fisher Scientific, Waltham, MA, USA) and Penicillin-Streptomycin (Sigma Aldrich, St. Louis, MO, USA).

*In vitro* labeling of Actin with jasplakinolide probes was performed in DMEM, high glucose, HEPES, no phenol red Medium (Thermo Fisher Scientific, Waltham, MA, USA) supplemented with Penicillin-Streptomycin (Sigma Aldrich, St. Louis, MO, USA). U-2 OS and COS-7 cells were incubated with 580CP-jasplakinolide (5  $\mu$ M for 30 min) or 610CP-jasplakinolide (1  $\mu$ M for 60 min), respectively. For a subsequent washing step, the cells were incubated in medium without fluorescent probes for additional 30 min.

## **2. Live-cell STED microscopy**

*In vitro* STED images were acquired using a quad scanning STED microscope (Abberior Instruments, Göttingen, Germany) equipped with a UPlanSApo 100x/1,40 Oil objective (Olympus, Tokyo, Japan). For all images a pixel size of 20 nm was utilized. 580CP was excited using a 561 nm laser beam, 610CP was excited using a 640 nm laser beam and STED was performed applying a laser beam with an emission wavelength of 775 nm. With the exception of contrast stretching no further image processing was applied.

### 3. HPLC Traces and ESI-MS data

**Figure S1.** LC-MS analysis of the reaction mixture  $5\text{-C}(\text{CH}_3)_2\text{C}_6\text{H}_5\text{-H} \rightarrow 5\text{-H-H}$  (11.2 min) +  $5\text{-H-C}(\text{CH}_3)_2\text{C}_6\text{H}_5$  (12.3 min); see Scheme 2 in the main text.

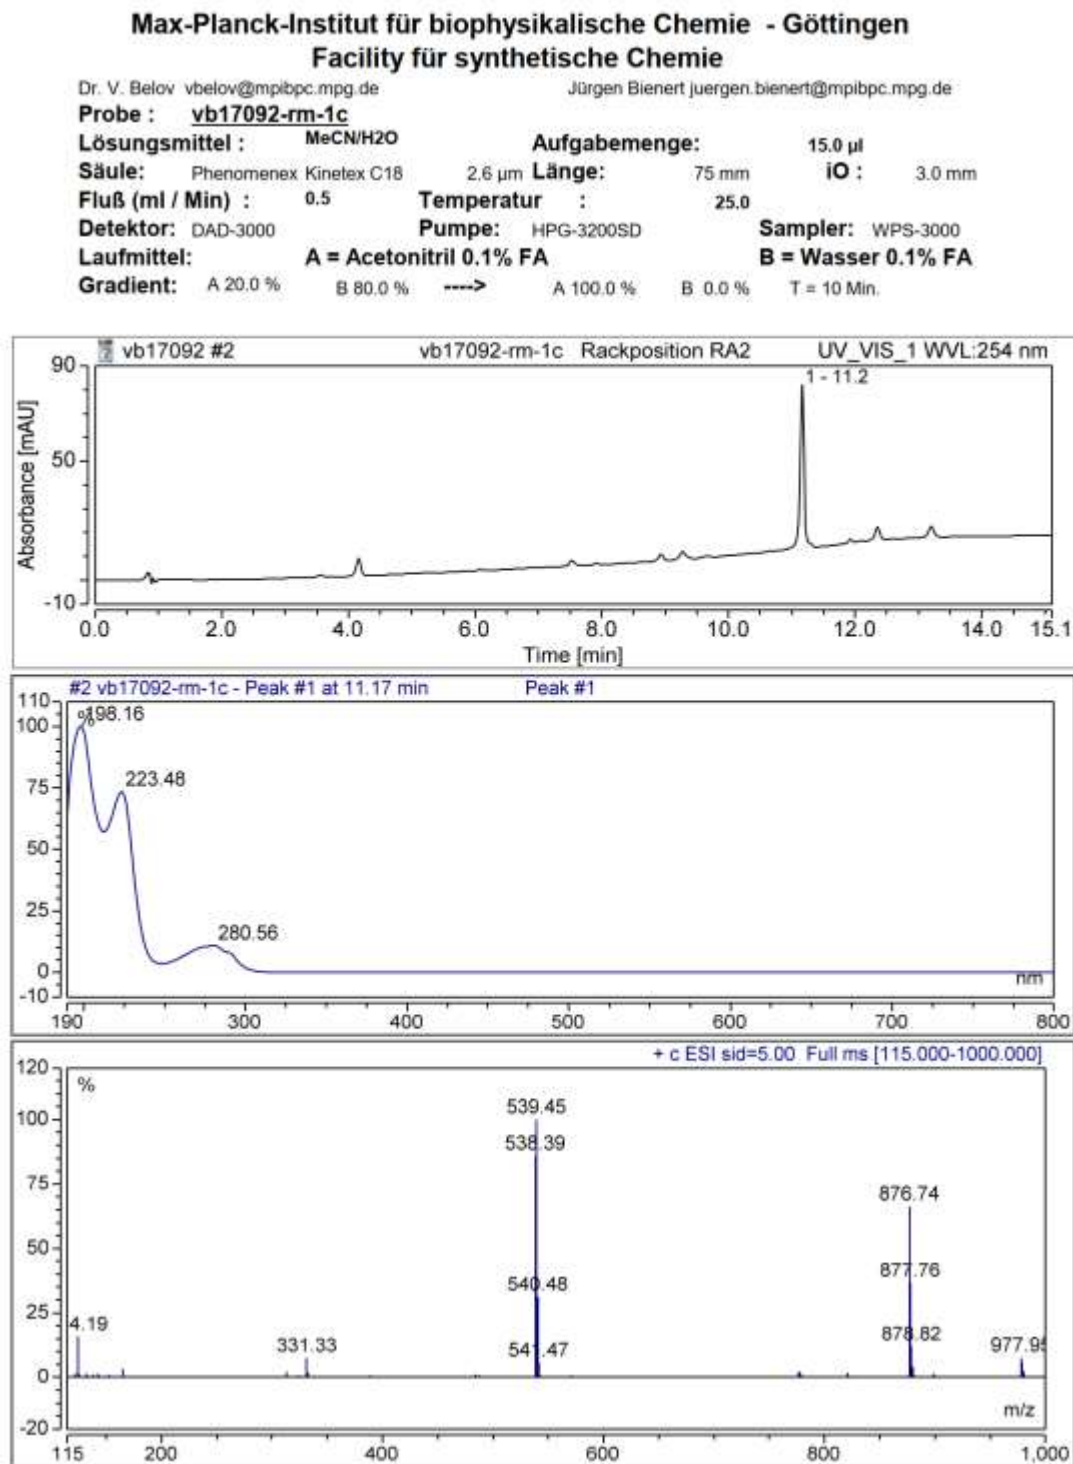

**Figure S2a.** HPLC trace of amine **9** formed from compound **7-H** (R = Boc) and formic acid according Scheme 4 in the main text.

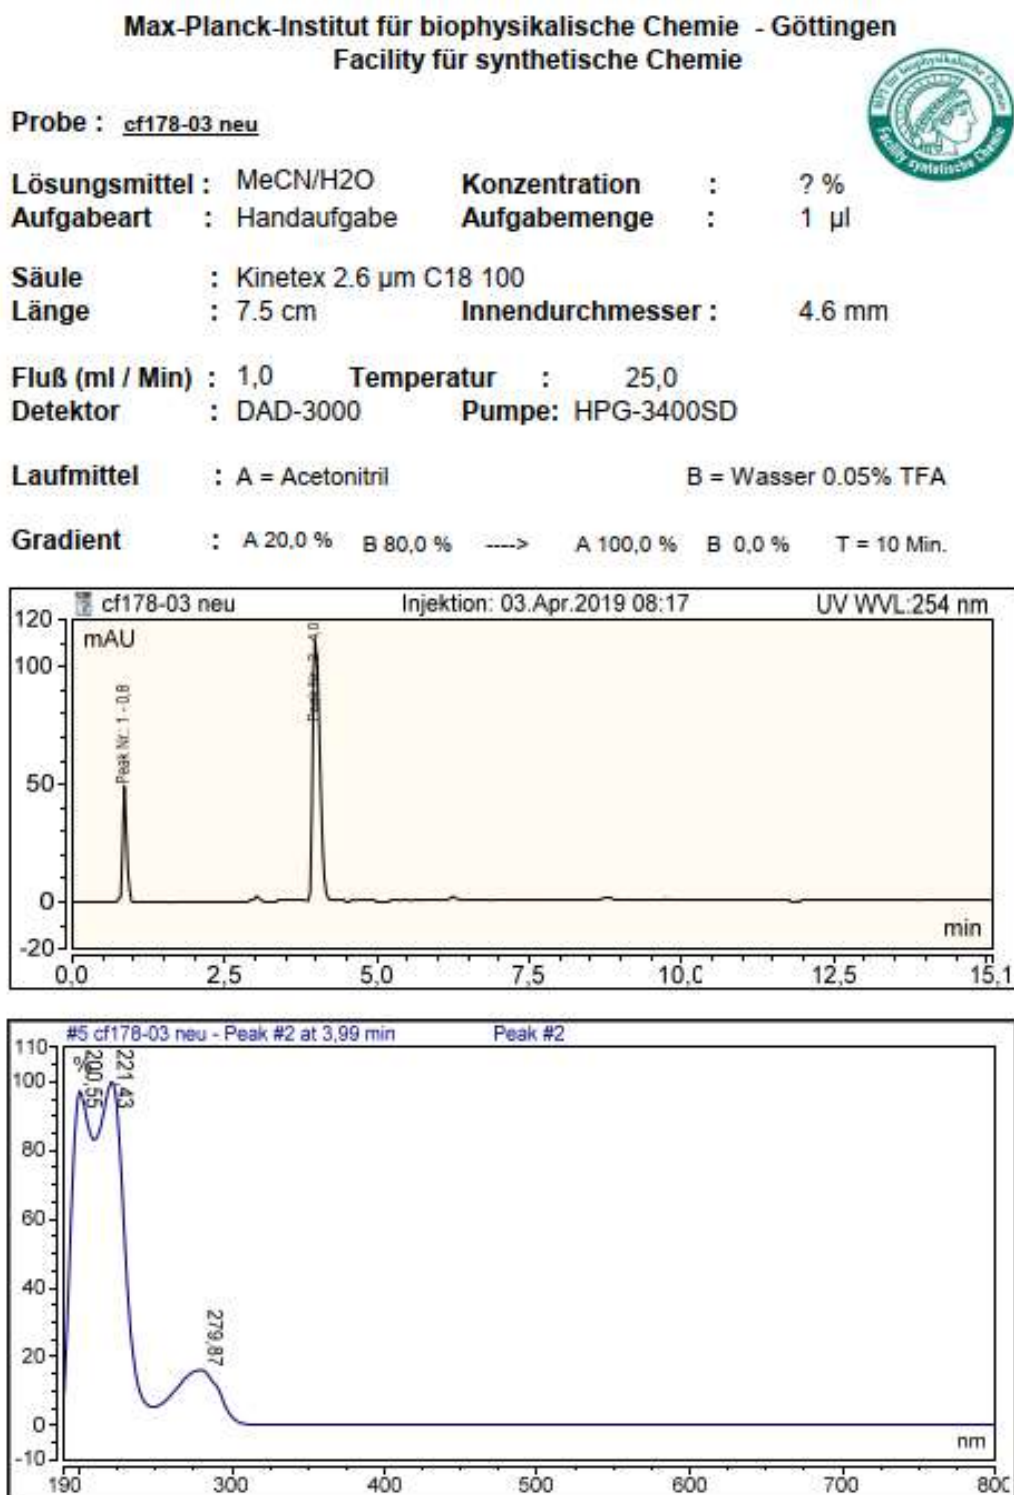

Jürgen Bienert    Tel.: 0551 2011251    juergen.bienert@mpibpc.mpg.de

**Figure S2b.** ESI-MS (positive mode) of amine **9** ( $C_{38}H_{51}N_5O_6$ ,  $M = 674.4$ ) formed from compound **7-H** ( $R = \text{Boc}$ ) and  $\text{HCOOH}$ ; see Scheme 4 in the main text.

Scan No: 18, Time: 0.170 minutes  
5 points averaged, Not background corrected.  
Comment: 0.170 min Scans: 14-18 105.2000 Ion: 273 us RfC: 2.166e+8  
Pul Count: 1259 MW: 0 Formula: None  
CAS No: None Acquired Range: 104.5 - 2090.5 m/z

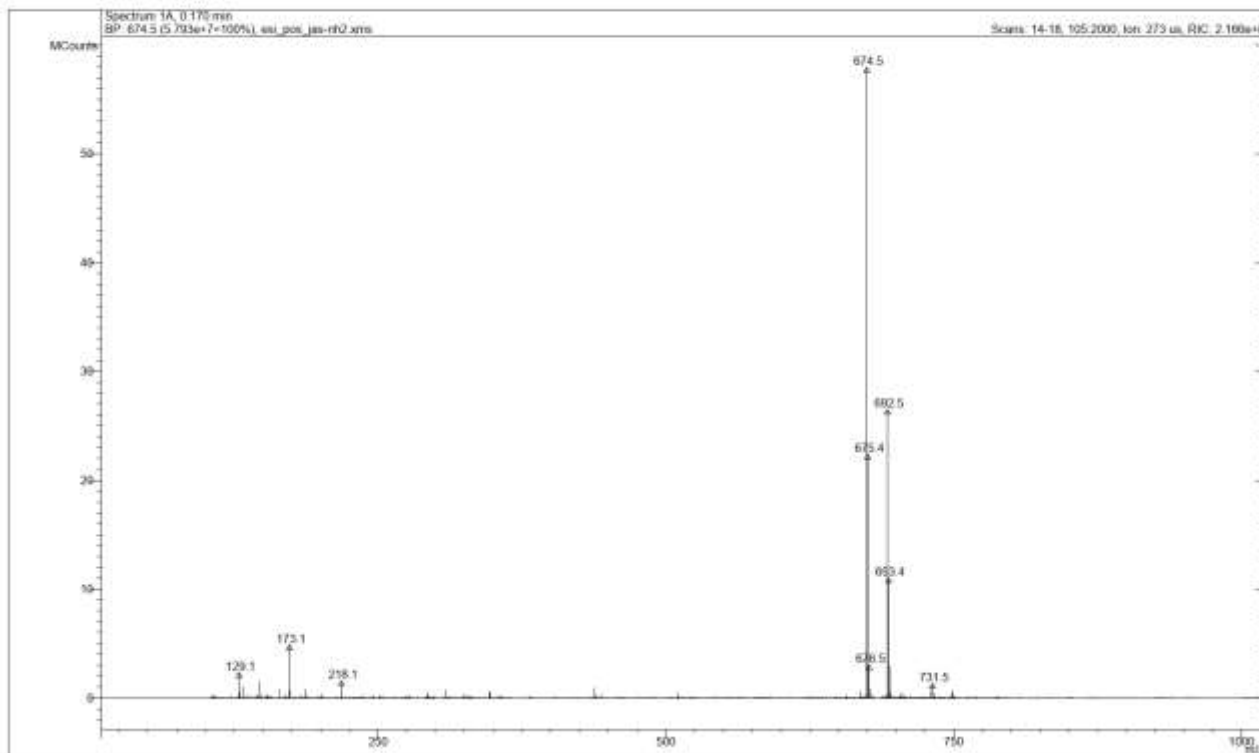

Figure S3a. HPLC trace of 580CP-jasplakinolide conjugate (see Scheme 4 and TOC graph)

Max-Planck-Institut für biophysikalische Chemie - Göttingen  
Facility für synthetische Chemie

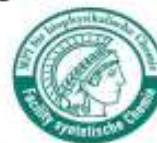

Probe : cf178-04 Fr 9-12 neu

Lösungsmittel : MeCN/H<sub>2</sub>O      Konzentration : ? %  
Aufgabeart : Handaufgabe      Aufgabemenge : 1 µl

Säule : Kinetex 2.6 µm C18 100  
Länge : 7.5 cm      Innendurchmesser : 4.6 mm

Fluß (ml / Min) : 1,0      Temperatur : 25,0  
Detektor : DAD-3000      Pumpe: HPG-3400SD

Laufmittel : A = Acetonitril      B = Wasser 0.05% TFA

Gradient : A 20,0 % B 80,0 % ----> A 100,0 % B 0,0 % T = 10 Min.

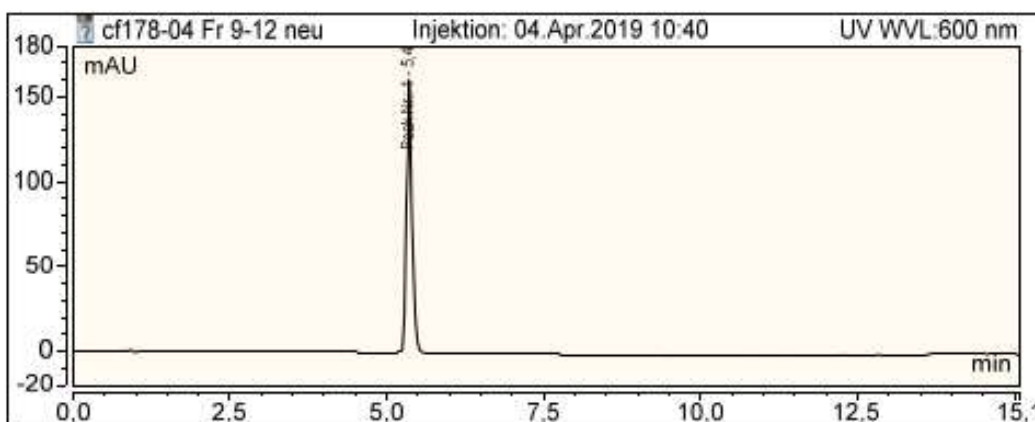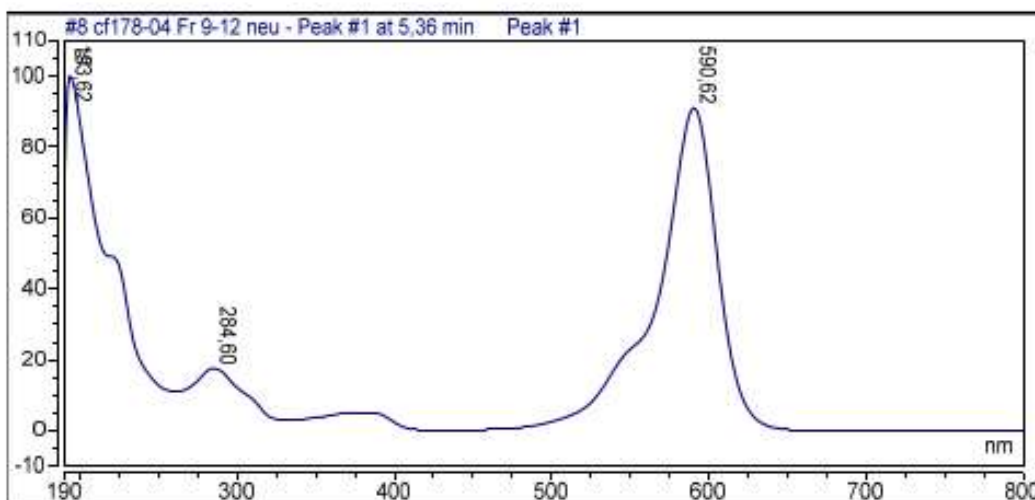

**Figure S3b.** HPLC trace of 610CP-jasplakinolide conjugate (see Scheme 4 and TOC graph)

Max-Planck-Institut für biophysikalische Chemie - Göttingen  
 Facility für synthetische Chemie

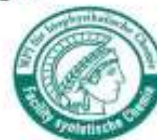

Probe : cf323-04 Reinheit

Lösungsmittel : MeCN/H<sub>2</sub>O      Konzentration : ? %  
 Aufgabearart : Handaufgabe      Aufgabemenge : 1 µl

Säule : Kinetex 2.6 µm C18 100  
 Länge : 7.5 cm      Innendurchmesser : 4.6 mm

Fluß (ml / Min) : 1,0      Temperatur : 25  
 Detektor : DAD-3000      Pumpe: HPG-3400SD

Laufmittel : A = Acetonitril      B = Wasser 0.05% TFA

Gradient : A 100,0 % B 0,0 % ----> A 100,0 % B 0,0 % T = 10 Min.

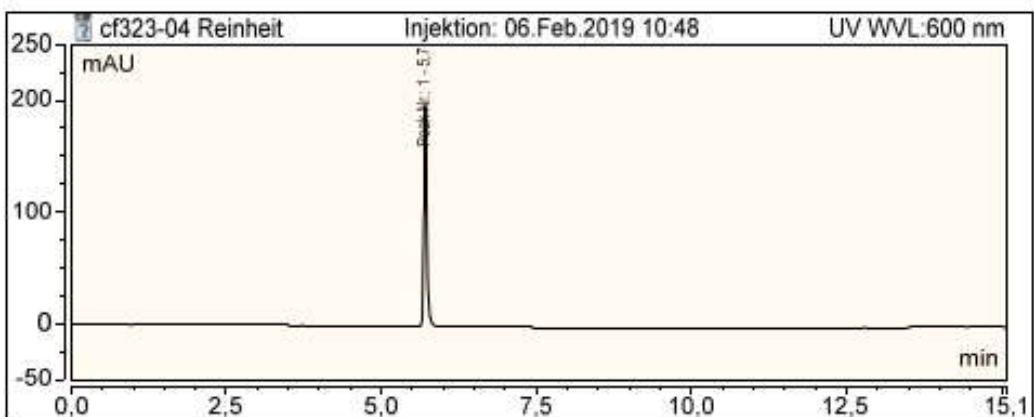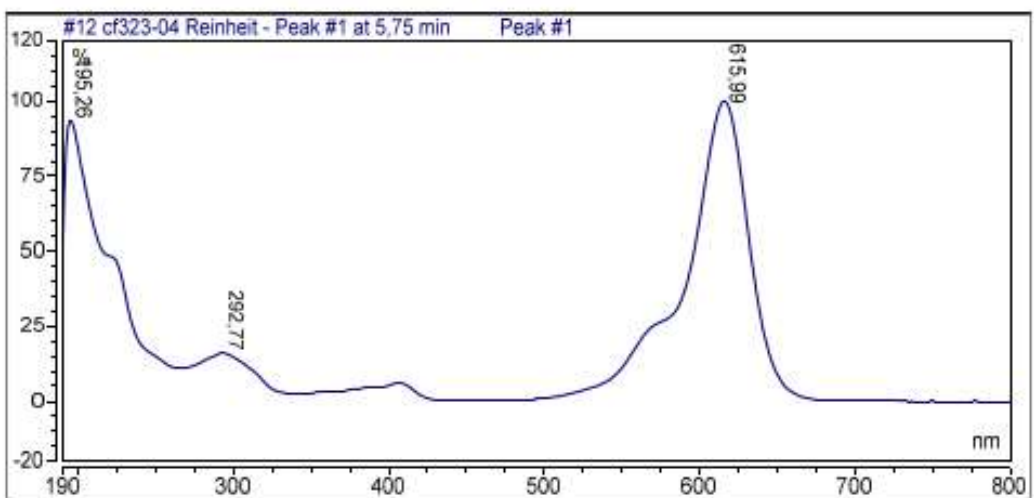



#### 4. NMR Spectra

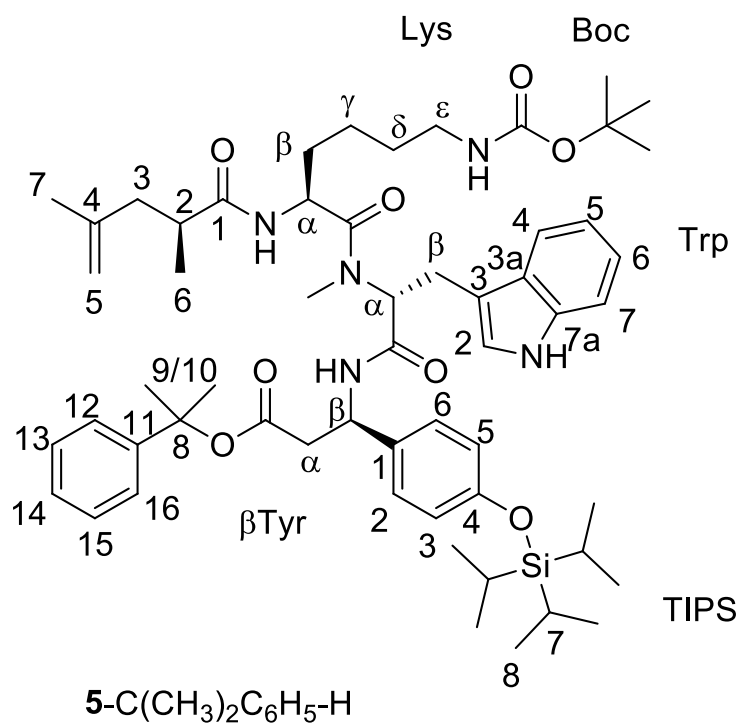

CDCl<sub>3</sub>, 600 MHz <sup>1</sup>H

| Position | δ(1H) / ppm | δ( <sup>13</sup> C{ <sup>1</sup> H}) / ppm | COSY           | HMBC                                          | NOESY                               |
|----------|-------------|--------------------------------------------|----------------|-----------------------------------------------|-------------------------------------|
| Trp α    | 5,62        | 56,58                                      | Trp β          | Trp β<br>Trp NMe<br>Trp 3<br>Trp CO<br>Lys CO | Trp NMe<br>Trp β<br>Trp 2<br>Trp 4  |
| Trp β    | 3,20 / 3,41 | 23,07                                      | Trp 2<br>Trp α | Trp α<br>Trp 3                                | Trp NMe<br>Trp α<br>Trp 4<br>Trp 2  |
| Trp NH   | 9,52        | -                                          | Trp 2          | -                                             | Trp 2<br>Trp 7                      |
| Trp 2    | 6,92        | 121,81                                     | Trp NH         | Trp 3                                         | Trp α<br>Trp NH<br>Trp β<br>Trp NMe |
| Trp 3    | -           | 110,58                                     | -              | -                                             | -                                   |
| Trp 3a   | -           | 127,31                                     | -              | -                                             | -                                   |
| Trp 4    | 7,56        | 118,47                                     | Trp 5<br>Trp 6 | Trp 3<br>Trp 6<br>Trp 3a<br>Trp 7a            | Trp NMe<br>Trp β<br>Trp α<br>Trp 5  |

|                      |             |               |                                                           |                                                                            |                                                                |
|----------------------|-------------|---------------|-----------------------------------------------------------|----------------------------------------------------------------------------|----------------------------------------------------------------|
| Trp 5                | 7,06        | 119,04        | Trp 4<br>Trp 6                                            | Trp 7<br>Trp 3a                                                            | Trp 4                                                          |
| Trp 6                | 7,12        | 121,69        | Trp 5<br>Trp 7                                            | Trp 4<br>Trp 7a<br>Trp CO                                                  | Trp 7                                                          |
| Trp 7                | 7,30        | 111,30        | Trp 6                                                     | Trp 5<br>Trp 3a                                                            | Trp 6<br>Boc Me                                                |
| Trp 7a               | -           | 136,39        | -                                                         | -                                                                          | -                                                              |
| Trp NMe              | 2,70        | 30,58         | -                                                         | Trp $\alpha$<br>Lys CO                                                     | Trp $\alpha$<br>Trp $\beta$<br>Trp 2<br>Trp 4                  |
| Trp CO               | -           | 169,10        | -                                                         | -                                                                          | -                                                              |
| $\beta$ Tyr NH       | 7,12        | -             | $\beta$ Tyr $\beta$                                       | -                                                                          | $\beta$ Tyr $\beta$                                            |
| $\beta$ Tyr $\alpha$ | 2,75 / 2,90 | 41,47         | $\beta$ Tyr $\beta$                                       | $\beta$ Tyr $\beta$<br>$\beta$ Tyr 1<br>$\beta$ Tyr CO                     | $\beta$ Tyr $\beta$<br>$\beta$ Tyr 2/6                         |
| $\beta$ Tyr $\beta$  | 5,35        | 49,54         | $\beta$ Tyr $\alpha$<br>$\beta$ Tyr 2/6<br>$\beta$ Tyr NH | $\beta$ Tyr $\alpha$<br>$\beta$ Tyr 2/6<br>$\beta$ Tyr 1<br>$\beta$ Tyr CO | $\beta$ Tyr $\alpha$<br>$\beta$ Tyr 2/6                        |
| $\beta$ Tyr CO       | -           | 169,34        | -                                                         | -                                                                          | -                                                              |
| $\beta$ Tyr 1        | -           | 133,18        | -                                                         | -                                                                          | -                                                              |
| $\beta$ Tyr 2/6      | 7,13        | 127,66        | $\beta$ Tyr $\beta$<br>$\beta$ Tyr 3/5                    | $\beta$ Tyr $\beta$<br>$\beta$ Tyr 6/2<br>$\beta$ Tyr 4                    | $\beta$ Tyr $\alpha$<br>$\beta$ Tyr $\beta$<br>$\beta$ Tyr 3/5 |
| $\beta$ Tyr 3/5      | 6,79        | 119,79        | $\beta$ Tyr 2/6                                           | $\beta$ Tyr 5/3<br>$\beta$ Tyr 1<br>$\beta$ Tyr 4                          | TIPS 7<br>TIPS 8<br>$\beta$ Tyr 2/6                            |
| $\beta$ Tyr 4        | -           | 155,38        | -                                                         | -                                                                          | -                                                              |
| TIPS 7               | 1,22        | 12,65         | TIPS 8                                                    | TIPS 8                                                                     | TIPS 8<br>$\beta$ Tyr 3/5                                      |
| TIPS 8               | 1,06 / 1,08 | 12,65 / 17,92 | TIPS 7                                                    | TIPS 7<br>TIPS 8                                                           | TIPS 7<br>TIPS 8                                               |
| 1                    | -           | 176,10        | -                                                         | -                                                                          | -                                                              |
| 2                    | 2,35        | 38,73         | 3<br>7                                                    | 7<br>2<br>5<br>3                                                           | 7<br>1<br>6<br>Lys NH                                          |
| 3                    | 1,98 / 2,30 | 41,82         | 4<br>6                                                    | 6<br>4<br>1<br>7<br>2<br>5                                                 | 7<br>1<br>6                                                    |
| 4                    | -           | 142,82        | -                                                         | -                                                                          | -                                                              |
| 5                    | 4,66 / 4,73 | 112,43        | 1                                                         | 1                                                                          | 3                                                              |

|                    |             |               |                                |                                               |                                                               |
|--------------------|-------------|---------------|--------------------------------|-----------------------------------------------|---------------------------------------------------------------|
|                    |             |               | 3                              | 3                                             | 4                                                             |
| 6                  | 1,05        | 17,27         | 4                              | 4<br>3<br>5                                   | 3<br>4                                                        |
| 7                  | 1,64        | 22,25         | 6                              | 6<br>2                                        | 6<br>3<br>4                                                   |
| 8                  | -           | 81,96         | -                              | -                                             | -                                                             |
| 9/10               | 1,65 / 1,63 | 28,78 / 28,10 | -                              | 10/9<br>8<br>11                               | 7,24                                                          |
| 11                 | -           | 145,51        | -                              | -                                             | -                                                             |
| 12/16              | 7,22        | 124,41        | 13/15<br>14                    | 8<br>16/12<br>14                              | 9/10                                                          |
| 13/15              | 7,26        | 128,19        | 12/16<br>14                    | 11<br>15/13<br>12/16                          | -                                                             |
| 14                 | 7,19        | 126,83        | 13/15<br>12/16                 | 12/16                                         | -                                                             |
| Lys NH             | 6,17        | -             | Lys $\alpha$                   | 5                                             | 7<br>4<br>Lys $\alpha$                                        |
| Lys CO             | -           | 173,20        | -                              | -                                             | -                                                             |
| Lys $\alpha$       | 4,45        | 49,63         | Lys NH                         | Lys $\gamma$<br>Lys $\beta$<br>Lys CO         | Lys $\gamma$<br>Lys $\beta$<br>Trp NMe<br>Lys NH              |
| Lys $\beta$        | 1,05 / 1,35 | 31,01         | Lys $\alpha$                   | Lys $\alpha$                                  | Lys $\delta$<br>Lys $\gamma$<br>Lys $\alpha$                  |
| Lys $\gamma$       | 0,74 (both) | 21,42         | Lys $\beta$<br>Lys $\delta$    | Lys $\beta$<br>Lys $\delta$<br>Lys $\epsilon$ | Lys $\delta$<br>Lys $\beta$<br>Lys $\epsilon$<br>Lys $\alpha$ |
| Lys $\delta$       | 1,19 (both) | 30,01         | Lys $\gamma$<br>Lys $\epsilon$ | Lys $\gamma$<br>Lys $\epsilon$                | Lys $\epsilon$<br>Lys $\beta$<br>Lys $\gamma$                 |
| Lys $\epsilon$     | 2,85 / 2,89 | 40,29         | Lys $\delta$                   | Lys $\delta$                                  | Lys $\gamma$<br>Lys $\delta$                                  |
| Lys $\epsilon$ /NH | 4,62        | -             | Lys $\epsilon$                 | -                                             | Lys $\epsilon$                                                |
| Boc CO             | -           | 156,47        | -                              | -                                             | -                                                             |
| Boc C              | -           | 79,75         | -                              | -                                             | -                                                             |
| Boc Me             | 1,49        | 28,48         | -                              | Boc C<br>Boc Me                               | -                                                             |

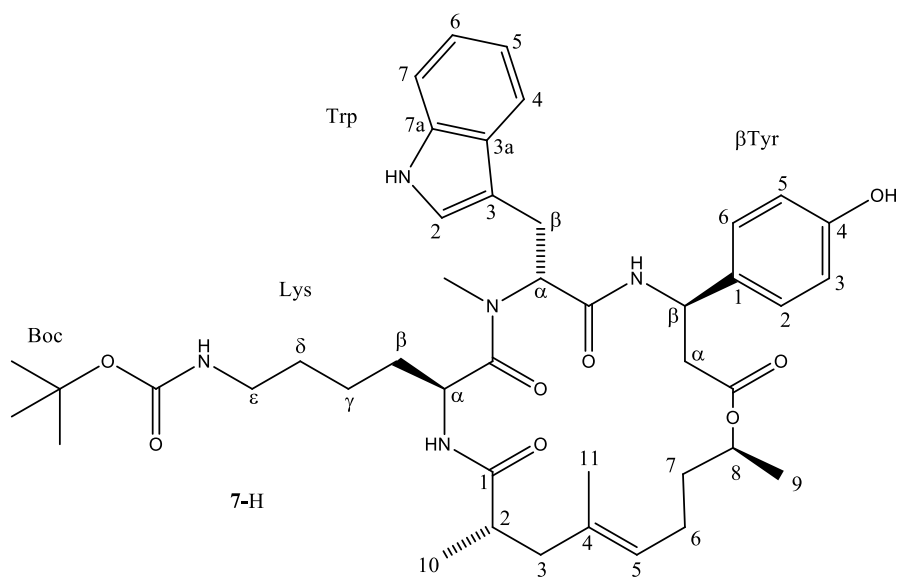

CDCl<sub>3</sub>, 600 MHz <sup>1</sup>H

| Position     | $\delta(^1\text{H})$ / ppm | $\delta(^{13}\text{C}\{^1\text{H}\})$ / ppm | COSY                    | HMBC                                       | NOESY                                                                           |
|--------------|----------------------------|---------------------------------------------|-------------------------|--------------------------------------------|---------------------------------------------------------------------------------|
| Trp $\alpha$ | 5,70                       | 56,38                                       | Trp $\beta$             | Trp CO<br>Lys CO<br>Trp $\beta$<br>Trp NMe | Trp $\beta$<br>Trp 2<br>$\beta$ Tyr NH<br>Trp 4                                 |
| Trp $\beta$  | 3,31 / 3,35                | 22,56                                       | Trp $\alpha$<br>Trp 2   | Trp 3<br>Trp 3a<br>Trp 2<br>Trp $\alpha$   | Trp NMe<br>Trp $\alpha$<br>Trp 2<br>Trp 4                                       |
| Trp 2        | 6,95                       | 121,78                                      | Trp $\beta$<br>Trp NH   | Trp 3<br>Trp 3a<br>Trp 7a                  | Lys $\gamma$<br>Lys $\beta$<br>Trp NMe<br>Trp $\beta$<br>Trp $\alpha$<br>Trp NH |
| Trp 3        | -                          | 110,12                                      | -                       | Trp $\beta$<br>Trp 2<br>Trp 4              | -                                                                               |
| Trp 3a       | -                          | 127,25                                      | -                       | Trp 2<br>Trp 4<br>Trp 5<br>Trp 7           | -                                                                               |
| Trp 4        | 7,60                       | 118,50                                      | Trp 5<br>Trp 7          | Trp 3<br>Trp 6<br>Trp 3a<br>Trp 7a         | Trp $\beta$<br>Trp $\alpha$<br>Trp 5<br>Trp 6                                   |
| Trp 5        | 7,10                       | 119,22                                      | Trp 4<br>Trp 6<br>Trp 7 | Trp 7<br>Trp 3a                            | Trp 6<br>Trp 4                                                                  |

|          |             |        |                         |                                                   |                                               |
|----------|-------------|--------|-------------------------|---------------------------------------------------|-----------------------------------------------|
| Trp 6    | 7,16        | 121,94 | Trp 4<br>Trp 5<br>Trp 7 | Trp 7a<br>Trp 4                                   | Trp 5<br>Trp 7                                |
| Trp 7    | 7,36        | 111,64 | Trp 4<br>Trp 5<br>Trp 6 | Trp 3a<br>Trp 5                                   | Trp 6<br>Trp NH<br>Boc Me                     |
| Trp 7a   | -           | 136,68 | -                       | Trp 2<br>Trp 4<br>Trp 6                           | -                                             |
| Trp NH   | 9,90        | -      | Trp 2                   | -                                                 | Boc Me<br>Lys ε/NH<br>Trp 2<br>Trp 7          |
| Trp CO   | -           | 169,58 | -                       | Trp α                                             | -                                             |
| Trp NMe  | 2,91        | 30,43  | -                       | Trp α<br>Lys CO                                   | Lys β<br>Trp β<br>Lys α<br>Trp 2              |
| βTyr NH  | 7,44        | -      | βTyr β                  | -                                                 | βTyr β<br>Trp α<br>βTyr 2/6                   |
| βTyr β   | 5,20        | 49,37  | βTyr NH<br>βTyr α       | βTyr 2/6<br>βTyr 1<br>Trp CO<br>βTyr CO<br>βTyr α | βTyr α<br>βTyr 2/6<br>βTyr NH                 |
| βTyr α   | 2,76 / 2,57 | 39,77  | βTyr β                  | βTyr β<br>βTyr 1<br>βTyr CO                       | βTyr α<br>βTyr β<br>βTyr 2/6                  |
| βTyr 1   | -           | 132,71 | -                       | βTyr β<br>βTyr α                                  | -                                             |
| βTyr 2/6 | 7,13        | 127,54 | βTyr 3/5                | βTyr 4<br>βTyr β<br>βTyr 5/3                      | 11<br>βTyr α<br>βTyr β<br>βTyr 3/5<br>βTyr NH |
| βTyr 3/5 | 6,77        | 115,71 | βTyr 2/6                | βTyr 6/2<br>βTyr 1<br>βTyr 4                      | 11<br>Tyr 2/6                                 |
| βTyr 4   | -           | 155,40 | -                       | βTyr 2/6<br>βTyr 3/5                              | -                                             |
| βTyr CO  | -           | 170,80 | -                       | βTyr β<br>βTyr α                                  | -                                             |
| 1        | -           | 175,54 | -                       | 2<br>3                                            | -                                             |
| 2        | 2,47        | 39,84  | 10<br>3                 | 1                                                 | 10<br>11                                      |

|        |                |        |                 |                               |                                     |
|--------|----------------|--------|-----------------|-------------------------------|-------------------------------------|
|        |                |        |                 |                               | Lys NH                              |
| 3      | 1,88 / 2,43    | 43,34  | 2               | 11<br>2<br>5<br>4<br>1        | 5<br>3<br>10<br>11                  |
| 4      | -              | 133,72 | -               | 3                             | -                                   |
| 5      | 4,99           | 125,08 | 6<br>11         | 11<br>6<br>7<br>3             | 7<br>6<br>3<br>8                    |
| 6      | 1,79 (both)    | 23,29  | 5<br>7          | 5<br>7<br>8<br>4              | 5<br>9<br>11<br>7<br>8              |
| 7      | 1,35 / 1,54    | 35,59  | 6<br>8          | 9<br>6<br>8<br>5              | 5<br>9<br>7<br>6<br>8               |
| 8      | 4,80           | 69,81  | 7<br>9          | βTyr CO<br>7<br>6<br>5        | 9<br>7<br>6<br>5                    |
| 9      | 1,10           | 20,64  | 8               | 7<br>8                        | 7<br>6<br>8                         |
| 10     | 1,14           | 20,36  | 2               | 2<br>3<br>1                   | 3<br>2                              |
| 11     | 1,42           | 16,12  | 5<br>3<br>6     | 3<br>4<br>5                   | 6<br>3<br>2                         |
| Lys NH | 6,77           | -      | Lys α           | Lys CO<br>1                   | 2<br>Lys α                          |
| Lys α  | 4,88           | 49,98  | Lys NH<br>Lys β | Lys γ<br>Lys β<br>Lys CO<br>1 | Lys γ<br>Lys β<br>Trp NMe<br>Lys NH |
| Lys CO | -              | 173,94 | -               | Lys NH<br>Lys α               | -                                   |
| Lys β  | 1,03 / 1,53    | 30,99  | Lys α<br>Lys γ  | Lys α                         | Lys β<br>Lys α<br>Lys γ             |
| Lys γ  | 0,64 /<br>0,98 | 21,12  | Lys β<br>Lys δ  | Lys α<br>Lys δ                | Lys β<br>Lys α                      |

|                    |             |        |                                |        |                                               |
|--------------------|-------------|--------|--------------------------------|--------|-----------------------------------------------|
| Lys $\delta$       | 1,21 / 1,26 | 30,24  | Lys $\gamma$<br>Lys $\epsilon$ | -      | Lys $\gamma$<br>Lys $\beta$<br>Lys $\epsilon$ |
| Lys $\epsilon$     | 2,82 / 3,04 | 40,85  | Lys $\delta$                   | -      | Lys $\delta$                                  |
| Lys $\epsilon$ /NH | 4,75        | -      | -                              | -      | -                                             |
| Boc CO             | -           | 156,80 | -                              | -      | -                                             |
| Boc C              | -           | 80,05  | -                              | Boc Me | -                                             |
| Boc Me             | 1,52        | 28,65  | -                              | Boc C  | -                                             |

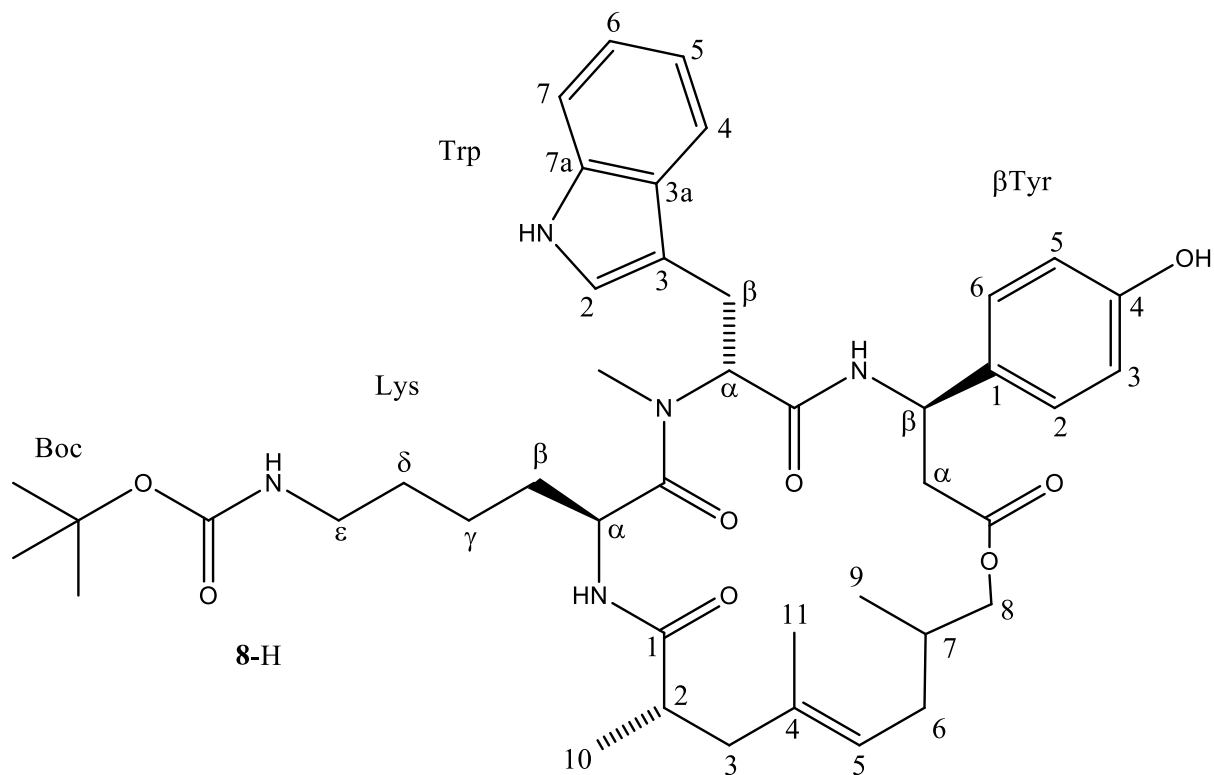

$\text{CDCl}_3$ , 500 MHz  $^1\text{H}$

| Position     | $\delta(^1\text{H})$ / ppm | $\delta(^{13}\text{C}\{^1\text{H}\})$ / ppm | COSY                                 | HMBC                                       | NOESY                                     |
|--------------|----------------------------|---------------------------------------------|--------------------------------------|--------------------------------------------|-------------------------------------------|
| Trp $\alpha$ | 5,55                       | 56,28                                       | Trp $\beta$                          | Trp $\beta$<br>Trp NMe<br>Trp CO<br>Lys CO | Trp $\beta$<br>Trp 2<br>Trp 5<br>Trp 4    |
| Trp $\beta$  | 3,18 / 3,40                | 22,53                                       | Trp $\beta$<br>Trp $\alpha$<br>Trp 2 | Trp 3<br>Trp 2<br>Trp 3a                   | Trp NMe<br>Trp $\alpha$<br>Trp 2<br>Trp 4 |
| Trp 2        | 6,92                       | 121,67                                      | Trp $\beta$<br>Trp NH                | Trp 3<br>Trp 3a<br>Trp 7a                  | Lys $\gamma$<br>11<br>Trp NMe             |

|                      |             |        |                                        |                                                                            |                                                                      |
|----------------------|-------------|--------|----------------------------------------|----------------------------------------------------------------------------|----------------------------------------------------------------------|
|                      |             |        |                                        |                                                                            | Trp $\alpha$<br>Trp NH                                               |
| Trp 3                | -           | 109,82 | -                                      | Trp 4<br>Trp 2<br>Trp $\beta$                                              | -                                                                    |
| Trp 3a               | -           | 127,08 | -                                      | Trp $\beta$<br>Trp 2<br>Trp 5<br>Trp 7<br>Trp 4                            | -                                                                    |
| Trp 4                | 7,58        | 118,34 | Trp 5<br>Trp 6<br>Trp 7                | Trp 3a<br>Trp 3<br>Trp 7a<br>Trp 6                                         | Trp NMe<br>Trp $\beta$<br>Trp $\alpha$<br>Trp 5                      |
| Trp 5                | 7,08        | 119,09 | Trp 7<br>Trp 4<br>Trp 6                | Trp 3a<br>Trp 7<br>Trp 4                                                   | $\beta$ Tyr $\alpha$<br>$\beta$ Tyr $\beta$<br>Trp $\alpha$<br>Trp 4 |
| Trp 6                | 7,13        | 121,80 | Trp 5<br>Trp 7<br>Trp 4                | Trp 4<br>Trp 7a                                                            | $\beta$ Tyr $\alpha$<br>Trp 7                                        |
| Trp 7                | 7,32        | 111,50 | Trp 4<br>Trp 5<br>Trp 6                | Trp 5<br>Trp 3a                                                            | Lys $\beta$<br>Boc<br>Trp 6<br>Trp NH                                |
| Trp 7a               | -           | 136,52 | -                                      | Trp 6<br>Trp 4<br>Trp 2                                                    | -                                                                    |
| Trp NH               | 9,87        | -      | Trp 2                                  | -                                                                          | Trp 7<br>Trp 2<br>Lys $\epsilon$<br>Boc                              |
| Trp CO               | -           | 169,50 | -                                      | Trp $\alpha$<br>$\beta$ Tyr $\beta$                                        | -                                                                    |
| Trp NMe              | 2,92        | 30,44  | -                                      | Trp $\alpha$<br>Lys CO                                                     | Trp 4<br>Trp 2<br>Trp $\beta$                                        |
| $\beta$ Tyr NH       | 7,08        | -      | $\beta$ Tyr $\beta$                    | -                                                                          |                                                                      |
| $\beta$ Tyr $\beta$  | 5,33        | 48,75  | $\beta$ Tyr NH<br>$\beta$ Tyr $\alpha$ | $\beta$ Tyr $\alpha$<br>$\beta$ Tyr 1<br>$\beta$ Tyr 2/6<br>$\beta$ Tyr CO | $\beta$ Tyr $\alpha$<br>$\beta$ Tyr 2/6                              |
| $\beta$ Tyr $\alpha$ | 2,59 / 2,76 | 39,89  | $\beta$ Tyr $\beta$                    | $\beta$ Tyr $\beta$<br>$\beta$ Tyr 1<br>$\beta$ Tyr CO                     | $\beta$ Tyr $\beta$<br>$\beta$ Tyr 2/6                               |
| $\beta$ Tyr 1        | -           | 132,75 | -                                      | $\beta$ Tyr $\beta$<br>$\beta$ Tyr $\alpha$                                | -                                                                    |



|                 |             |        |                 |                                                         |                                                                |
|-----------------|-------------|--------|-----------------|---------------------------------------------------------|----------------------------------------------------------------|
| $\beta$ Tyr 2/6 | 7,14        | 127,48 | $\beta$ Tyr 3/5 | $\beta$ Tyr $\beta$<br>$\beta$ Tyr 2/6<br>$\beta$ Tyr 4 | $\beta$ Tyr $\alpha$<br>$\beta$ Tyr $\beta$<br>$\beta$ Tyr 3/5 |
| $\beta$ Tyr 3/5 | 6,78        | 115,58 | $\beta$ Tyr 2/6 | $\beta$ Tyr 3/5<br>$\beta$ Tyr 1<br>$\beta$ Tyr 4       | $\beta$ Tyr 2/6                                                |
| $\beta$ Tyr 4   | -           | 155,23 | -               | $\beta$ Tyr 2/6<br>$\beta$ Tyr 3/5                      | -                                                              |
| $\beta$ Tyr CO  | -           | 170,82 | -               | $\beta$ Tyr $\beta$<br>$\beta$ Tyr $\alpha$             | -                                                              |
| 1               | -           | 175,24 | -               | 10<br>3<br>2<br>Lys NH                                  | -                                                              |
| 2               | 2,45        | 40,01  | 10<br>3         | 10<br>1                                                 | 10<br>11<br>3<br>5<br>Lys NH                                   |
| 3               | 1,88 / 2,41 | 43,46  | 2               | 2<br>1<br>4<br>5                                        | 10<br>11                                                       |
| 4               | -           | 133,94 | -               | 11<br>3                                                 | -                                                              |
| 5               | 5,06        | 124,36 | 11<br>6         | 11<br>6                                                 | 9<br>6<br>7<br>3<br>8                                          |
| 6               | 1,73 / 1,90 | 31,16  | 5<br>7<br>11    | 8<br>4<br>5                                             | 9<br>5                                                         |
| 7               | 1,65        | 33,04  | 9<br>8          | 9<br>6<br>8                                             | 9<br>6<br>8<br>5                                               |
| 8               | 3,70 / 3,97 | 67,05  | 7               | 9<br>6<br>7<br>$\beta$ Tyr CO                           | 9<br>7<br>5<br>Lys $\alpha$                                    |
| 9               | 0,84        | 17,47  | 7               | 6<br>7<br>8                                             | 6<br>7<br>8                                                    |
| 10              | 1,11        | 20,01  | 3<br>2          | 2<br>3<br>1                                             | 3<br>2                                                         |

|                    |                |        |                                |                                                   |                                                             |
|--------------------|----------------|--------|--------------------------------|---------------------------------------------------|-------------------------------------------------------------|
| 11                 | 1,49           | 15,82  | -                              | 3<br>5<br>4                                       | Lys $\beta$<br>3<br>2                                       |
| Lys NH             | 6,65           | -      | Lys $\alpha$                   | Lys CO<br>1                                       | 10<br>Lys $\beta$<br>11<br>3<br>Lys $\alpha$                |
| Lys $\alpha$       | 4,74           | 49,80  | Lys NH<br>Lys $\beta$          | Lys $\gamma$<br>Lys $\beta$<br>Lys CO             | Lys $\gamma$<br>Lys $\beta$<br>11<br>Trp NMe<br>8<br>Lys NH |
| Lys CO             | -              | 173,54 | -                              | Lys $\alpha$<br>Trp NMe<br>Trp $\alpha$<br>Lys NH | -                                                           |
| Lys $\beta$        | 0,94 / 1,50    | 30,74  | Lys $\alpha$<br>Lys $\gamma$   | Lys $\alpha$                                      | Lys $\gamma$<br>11<br>Trp NMe<br>Lys $\alpha$<br>Lys NH     |
| Lys $\gamma$       | 0,59 /<br>0,93 | 20,91  | Lys $\beta$<br>Lys $\delta$    | Lys $\alpha$                                      | Lys $\delta$<br>Trp 2                                       |
| Lys $\delta$       | 1,16 / 1,22    | 30,06  | Lys $\gamma$<br>Lys $\epsilon$ | -                                                 | Lys $\epsilon$<br>Lys $\gamma$                              |
| Lys $\epsilon$     | 2,78 / 3,01    | 40,68  | Lys $\delta$                   | -                                                 | Lys $\delta$                                                |
| Lys $\epsilon$ /NH | 4,73           | -      | -                              | -                                                 | -                                                           |
| Boc CO             | -              | 156,69 | -                              | -                                                 | -                                                           |
| Boc C              | -              | 79,91  | -                              | -                                                 | -                                                           |
| Boc Me             | 1,50           | 28,50  | -                              | -                                                 | -                                                           |

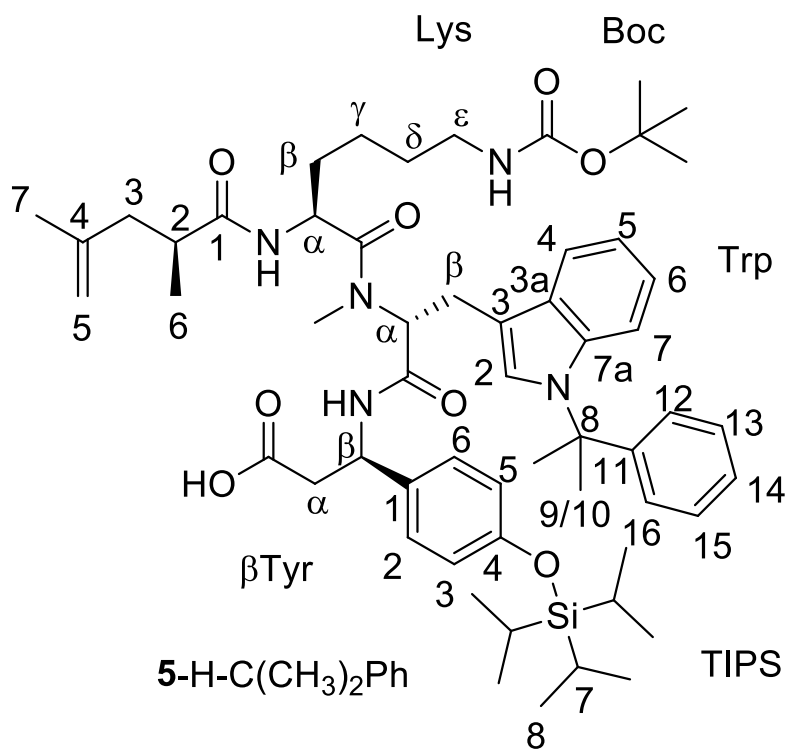

CDCl<sub>3</sub>, 600 MHz <sup>1</sup>H

| Position | δ( <sup>1</sup> H) / ppm | δ( <sup>13</sup> C{ <sup>1</sup> H}) / ppm | COSY                    | HMBC                                    | NOESY                     |
|----------|--------------------------|--------------------------------------------|-------------------------|-----------------------------------------|---------------------------|
| Trp α    | 5,56                     | 57,31                                      | Trp β                   | Trp β<br>Trp NMe                        |                           |
| Trp β    | 3,24 / 3,47              | 23,09                                      | Trp α                   | Trp α<br>Trp 2<br>Trp 3<br>Trp 3a       | Trp α<br>Trp 4<br>Trp NMe |
| Trp 2    | 7,27                     | 123,80                                     | -                       | Trp β<br>Trp 3<br>Trp 3a<br>Trp 7a<br>8 | 9/10                      |
| Trp 3    | -                        | 109,53                                     | -                       | -                                       | -                         |
| Trp 3a   | -                        | 129,55                                     | -                       | -                                       | -                         |
| Trp 4    | 7,54                     | 118,75                                     | Trp 5<br>Trp 6          | Trp 3<br>Trp 6<br>Trp 3a<br>Trp 7a      | Trp 5                     |
| Trp 5    | 6,97                     | 118,94                                     | Trp 4<br>Trp 6<br>Trp 7 | Trp 7<br>Trp 3a                         | Trp 4<br>Trp 6            |
| Trp 6    | 6,84                     | 121,02                                     | Trp 4<br>Trp 5<br>Trp 7 | Trp 4<br>Trp 7a                         | Trp 5<br>Trp 7            |

|                      |             |        |                                        |                                                                            |                                                                                    |
|----------------------|-------------|--------|----------------------------------------|----------------------------------------------------------------------------|------------------------------------------------------------------------------------|
| Trp 7                | 6,56        | 113,77 | Trp 5<br>Trp 6                         | Trp 5<br>Trp 3a                                                            | 9/10<br>Trp 6<br>12/16                                                             |
| Trp 7a               | -           | 135,48 | -                                      | -                                                                          | -                                                                                  |
| Trp NMe              | 3,00        | 31,13  | -                                      | Lys CO<br>Trp $\alpha$                                                     | Lys $\alpha$<br>Lys NH                                                             |
| Trp CO               | -           | 169,22 | -                                      | -                                                                          | -                                                                                  |
| $\beta$ Tyr NH       | 7,10        | -      | $\beta$ Tyr $\beta$                    |                                                                            |                                                                                    |
| $\beta$ Tyr $\alpha$ | 2,83 / 2,78 | 40,92  | $\beta$ Tyr $\beta$                    | $\beta$ Tyr $\beta$<br>$\beta$ Tyr 1<br>$\beta$ Tyr CO                     | $\beta$ Tyr 2/6                                                                    |
| $\beta$ Tyr $\beta$  | 5,37        | 49,63  | $\beta$ Tyr $\alpha$<br>$\beta$ Tyr NH | $\beta$ Tyr $\alpha$<br>$\beta$ Tyr 2/6<br>$\beta$ Tyr 1<br>$\beta$ Tyr CO | $\beta$ Tyr 2/6                                                                    |
| $\beta$ Tyr CO       | -           | 172,6  | -                                      | -                                                                          | -                                                                                  |
| $\beta$ Tyr 1        | -           | 133,42 | -                                      | -                                                                          | -                                                                                  |
| $\beta$ Tyr 2/6      | 7,13        | 127,40 | $\beta$ Tyr 3/5                        | $\beta$ Tyr $\beta$<br>$\beta$ Tyr 2/6<br>$\beta$ Tyr 4                    | $\beta$ Tyr $\beta$<br>$\beta$ Tyr 3/5<br>$\beta$ Tyr $\alpha$                     |
| $\beta$ Tyr 3/5      | 6,77        | 119,96 | $\beta$ Tyr 2/6                        | $\beta$ Tyr 3/5<br>$\beta$ Tyr 1<br>$\beta$ Tyr 4                          | $\beta$ Tyr $\alpha$<br>$\beta$ Tyr $\beta$<br>$\beta$ Tyr 2/6<br>TIPS 7<br>TIPS 8 |
| $\beta$ Tyr 4        | -           | 155,43 | -                                      | -                                                                          | -                                                                                  |
| TIPS 7               | 1,21        | 12,80  | TIPS 8                                 | TIPS 8                                                                     | TIPS 8<br>$\beta$ Tyr 3/5                                                          |
| TIPS 8               | 1,07        | 18,07  | TIPS 7                                 | TIPS 7<br>TIPS 8                                                           | TIPS 7                                                                             |
| 1                    | -           | 178,17 | -                                      |                                                                            | -                                                                                  |
| 2                    | 2,55        | 38,97  | 3<br>7                                 | 5<br>3<br>7                                                                | 3<br>1<br>7<br>6<br>5                                                              |
| 3                    | 2,05 / 2,40 | 41,81  | 4<br>6                                 | 4<br>6<br>2<br>5<br>1                                                      | 3<br>7                                                                             |
| 4                    | -           | 142,84 | -                                      |                                                                            | -                                                                                  |
| 5                    | 4,71 / 4,76 | 112,69 | 1<br>3                                 | 1<br>3                                                                     | 6<br>1<br>3<br>4                                                                   |
| 6                    | 1,12        | 17,49  | 4                                      | 4                                                                          | 3                                                                                  |

|          |             |               |                   |                      |                         |
|----------|-------------|---------------|-------------------|----------------------|-------------------------|
|          |             |               |                   | 3<br>5               | 4<br>Lys NH             |
| 7        | 1,69        | 22,42         | 6                 | 3<br>6<br>2          | 3<br>4                  |
| 8        | -           | 60,43         | -                 | Trp 2                | -                       |
| 9/10     | 1,87 / 1,88 | 30,41 / 30,33 | -                 | 10/9<br>8<br>11      | Trp 2<br>Trp 7<br>12/16 |
| 11       | -           | 146,86        | -                 | -                    | -                       |
| 12/16    | 7,10        | 125,24        | 13/15<br>14       | 8<br>16/12<br>14     | 9/10<br>Trp 7           |
| 13/15    | 7,25        | 128,75        | 12/16<br>14       | 15/13<br>11<br>12/16 | 12/16<br>14             |
| 14       | 7,22        | 127,08        | 12/16<br>13/15    | 12/16                | 13/15<br>14             |
| Lys NH   | 6,71        | -             | Lys α             | -                    | Trp NMe<br>7            |
| Lys CO   | -           | 173,28        | -                 | -                    | -                       |
| Lys α    | 4,65        | 49,93         | Lys β<br>Lys NH   | -                    | Trp NMe                 |
| Lys β    | 1,33 / 1,29 | 31,12         | Lys α<br>Lys γ    | -                    | -                       |
| Lys γ    | 1,17        | 22,49         | Lys β             | -                    | -                       |
| Lys δ    | 1,30 / 1,17 | 29,68         | Lys ε             | Lys ε                | Lys ε                   |
| Lys ε    | 2,99 / 2,91 | 39,61         | Lys δ<br>Lys ε/NH | -                    | -                       |
| Lys ε/NH | 4,51        | -             | Lys ε             | -                    | -                       |
| Boc CO   | -           | 156,48        | -                 | -                    | -                       |
| Boc C    | -           | 79,48         | -                 | -                    | -                       |
| Boc Me   | 1,43        | 28,57         | -                 | Boc Me<br>Boc C      | -                       |

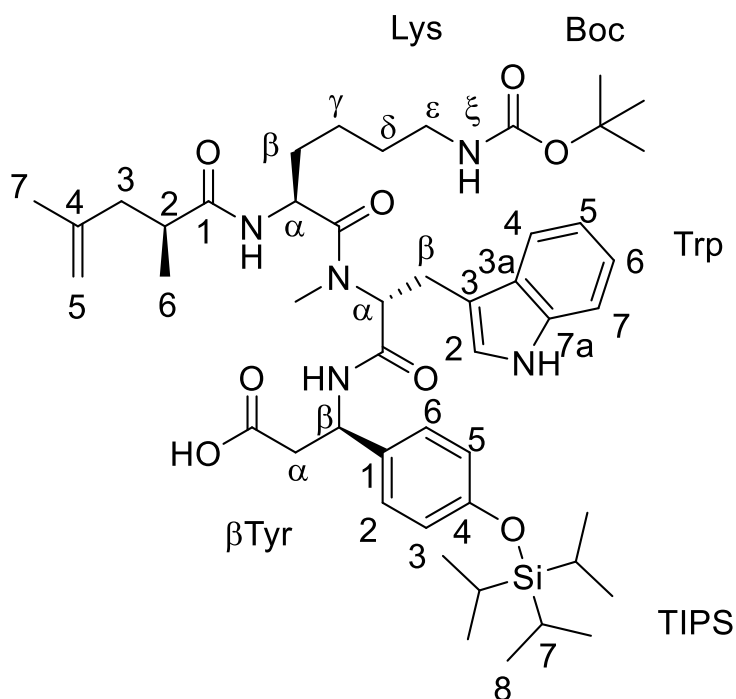

5-H-H = 1-H-TIPS

CDCl<sub>3</sub>, 600 MHz <sup>1</sup>H

| Position     | $\delta(^1\text{H})$ / ppm | $\delta(^{13}\text{C}\{^1\text{H}\})$ / ppm | COSY           | HMBC                               | NOESY                                    |
|--------------|----------------------------|---------------------------------------------|----------------|------------------------------------|------------------------------------------|
| Trp $\alpha$ | 5,59                       | 56,26                                       | Trp $\beta$    | -                                  | Trp $\beta$<br>Trp NMe<br>$\beta$ Tyr NH |
| Trp $\beta$  | 3,25<br>3,32               | 22,54                                       | Trp $\alpha$   | Trp 3<br>Trp 2<br>Trp 3a           | Trp $\alpha$                             |
| Trp NH       | 9,41                       | -                                           | Trp 2          | -                                  | Trp 2                                    |
| Trp 2        | 6,90                       | 121,63                                      | Trp NH         | Trp 3<br>Trp 3a<br>Trp 7a          | Trp NH                                   |
| Trp 3        | -                          | 110,22                                      | -              | -                                  | -                                        |
| Trp 3a       | -                          | 126,98                                      | -              | -                                  | -                                        |
| Trp 4        | 7,53                       | 118,19                                      | Trp 5          | Trp 3<br>Trp 6<br>Trp 3a<br>Trp 7a | Trp 5                                    |
| Trp 5        | 7,02                       | 118,77                                      | Trp 4<br>Trp 6 | Trp 7<br>Trp 3a                    | Trp 4<br>Trp 6                           |
| Trp 6        | 7,08                       | 121,41                                      | Trp 5<br>Trp 7 | Trp 4<br>Trp 7a                    | Trp 7<br>Trp 5                           |
| Trp 7        | 7,27                       | 110,98                                      | Trp 6          | Trp 5<br>Trp 3a                    | Trp 6                                    |

|                      |              |        |                                        |                                                                                      |                                                                        |
|----------------------|--------------|--------|----------------------------------------|--------------------------------------------------------------------------------------|------------------------------------------------------------------------|
| Trp 7a               | -            | 136,06 | -                                      | -                                                                                    | -                                                                      |
| Trp NMe              | 2,85         | 30,25  | -                                      | Trp $\alpha$<br>Lys CO                                                               | Trp $\alpha$<br>Lys $\alpha$<br>$\beta$ Tyr NH                         |
| Trp CO               | -            | 168,89 | -                                      | -                                                                                    | -                                                                      |
| $\beta$ Tyr NH       | 7,42         | -      | $\beta$ Tyr $\beta$                    | -                                                                                    | $\beta$ Tyr $\beta$<br>Trp $\alpha$<br>$\beta$ Tyr $\alpha$<br>Trp NMe |
| $\beta$ Tyr $\alpha$ | 2,71         | 40,78  | $\beta$ Tyr $\beta$                    | $\beta$ Tyr $\beta$<br>$\beta$ Tyr 1<br>$\beta$ Tyr CO                               | $\beta$ Tyr $\beta$<br>$\beta$ Tyr 2/6<br>$\beta$ Tyr NH               |
| $\beta$ Tyr $\beta$  | 5,29         | 49,10  | $\beta$ Tyr NH<br>$\beta$ Tyr $\alpha$ | $\beta$ Tyr $\alpha$<br>$\beta$ Tyr 2/6<br>$\beta$ Tyr 1<br>Trp CO<br>$\beta$ Tyr CO | $\beta$ Tyr 2/6<br>$\beta$ Tyr NH<br>$\beta$ Tyr $\alpha$              |
| $\beta$ Tyr CO       | -            | 173,35 | -                                      | -                                                                                    | -                                                                      |
| $\beta$ Tyr 1        | -            | 133,16 | -                                      | -                                                                                    | -                                                                      |
| $\beta$ Tyr 2/6      | 7,10         | 127,02 | $\beta$ Tyr 3/5                        | $\beta$ Tyr 4<br>$\beta$ Tyr $\beta$<br>$\beta$ Tyr 6/2                              | $\beta$ Tyr $\alpha$<br>$\beta$ Tyr $\beta$<br>$\beta$ Tyr 3/5         |
| $\beta$ Tyr 3/5      | 6,73         | 119,38 | $\beta$ Tyr 2/6                        | $\beta$ Tyr 4<br>$\beta$ Tyr 5/3<br>$\beta$ Tyr 1                                    | $\beta$ Tyr 2/6<br>TIPS 8<br>TIPS 7                                    |
| $\beta$ Tyr 4        | -            | 154,86 | -                                      | -                                                                                    | -                                                                      |
| TIPS 7               | 1,17         | 12,32  | TIPS 8                                 | TIPS 8                                                                               | $\beta$ Tyr 3/5                                                        |
| TIPS 8               | 1,02         | 17,60  | TIPS 7                                 | TIPS 8<br>TIPS 7                                                                     | $\beta$ Tyr 3/5                                                        |
| 1                    | -            | 176,79 | -                                      | -                                                                                    | -                                                                      |
| 2                    | 2,38         | 38,56  | 3<br>7                                 | 7<br>5                                                                               | 3<br>1<br>6<br>7                                                       |
| 3                    | 1,95<br>2,27 | 41,35  | 4<br>6                                 | 1<br>4<br>6<br>2<br>5<br>7                                                           | 4<br>6<br>1                                                            |
| 4                    | -            | 142,41 | -                                      | -                                                                                    | -                                                                      |
| 5                    | 4,62<br>4,67 | 112,16 | 1<br>3                                 | 1<br>3                                                                               | 1<br>3<br>4                                                            |
| 6                    | 1,01         | 17,04  | 4                                      | 4<br>3<br>5                                                                          | 4<br>Lys NH                                                            |

|                |              |        |                                |                                            |                                  |
|----------------|--------------|--------|--------------------------------|--------------------------------------------|----------------------------------|
| 7              | 1,60         | 21,92  | 6                              | 3<br>6<br>2                                | 3<br>4<br>6                      |
| Lys NH         | 6,55         | -      | Lys $\alpha$                   | 5                                          | 7<br>3<br>Lys $\alpha$           |
| Lys CO         | -            | 172,66 | -                              | -                                          | -                                |
| Lys $\alpha$   | 4,56         | 49,31  | Lys $\beta$<br>Lys NH          | Lys $\gamma$<br>Lys $\beta$<br>Lys CO<br>5 | Lys $\beta$<br>Trp NMe<br>Lys NH |
| Lys $\beta$    | 1,07<br>1,24 | 30,61  | Lys $\alpha$<br>Lys $\gamma$   | -                                          | -                                |
| Lys $\gamma$   | 0,82         | 21,43  | Lys $\beta$<br>Lys $\delta$    | -                                          | -                                |
| Lys $\delta$   | 1,18         | 29,60  | Lys $\gamma$<br>Lys $\epsilon$ | -                                          | -                                |
| Lys $\epsilon$ | 2,84<br>2,91 | 39,86  | Lys $\delta$<br>Lys $\xi$      | Boc CO                                     | -                                |
| Lys $\xi$      | 4,61         | -      | Lys $\epsilon$                 | -                                          | -                                |
| Boc CO         | -            | 156,20 | -                              | -                                          | -                                |
| Boc C          | -            | 79,43  | -                              | -                                          | -                                |
| Boc Me         | 1,44         | 28,16  | -                              | Boc Me<br>Boc C                            | -                                |

**Figures S4a-e.** NMR spectra of compound 1-H-TIPS (**5-H-H**) in CDCl<sub>3</sub>: <sup>1</sup>H (600 MHz), <sup>13</sup>C{<sup>1</sup>H} (151 MHz), APT (CH/CH<sub>3</sub>+, C<sub>q</sub>/CH<sub>2</sub>-), <sup>1</sup>H-<sup>1</sup>H, and <sup>1</sup>H-<sup>13</sup>C (HSQC) COSY.

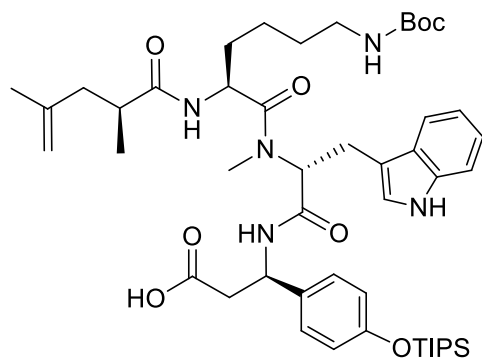



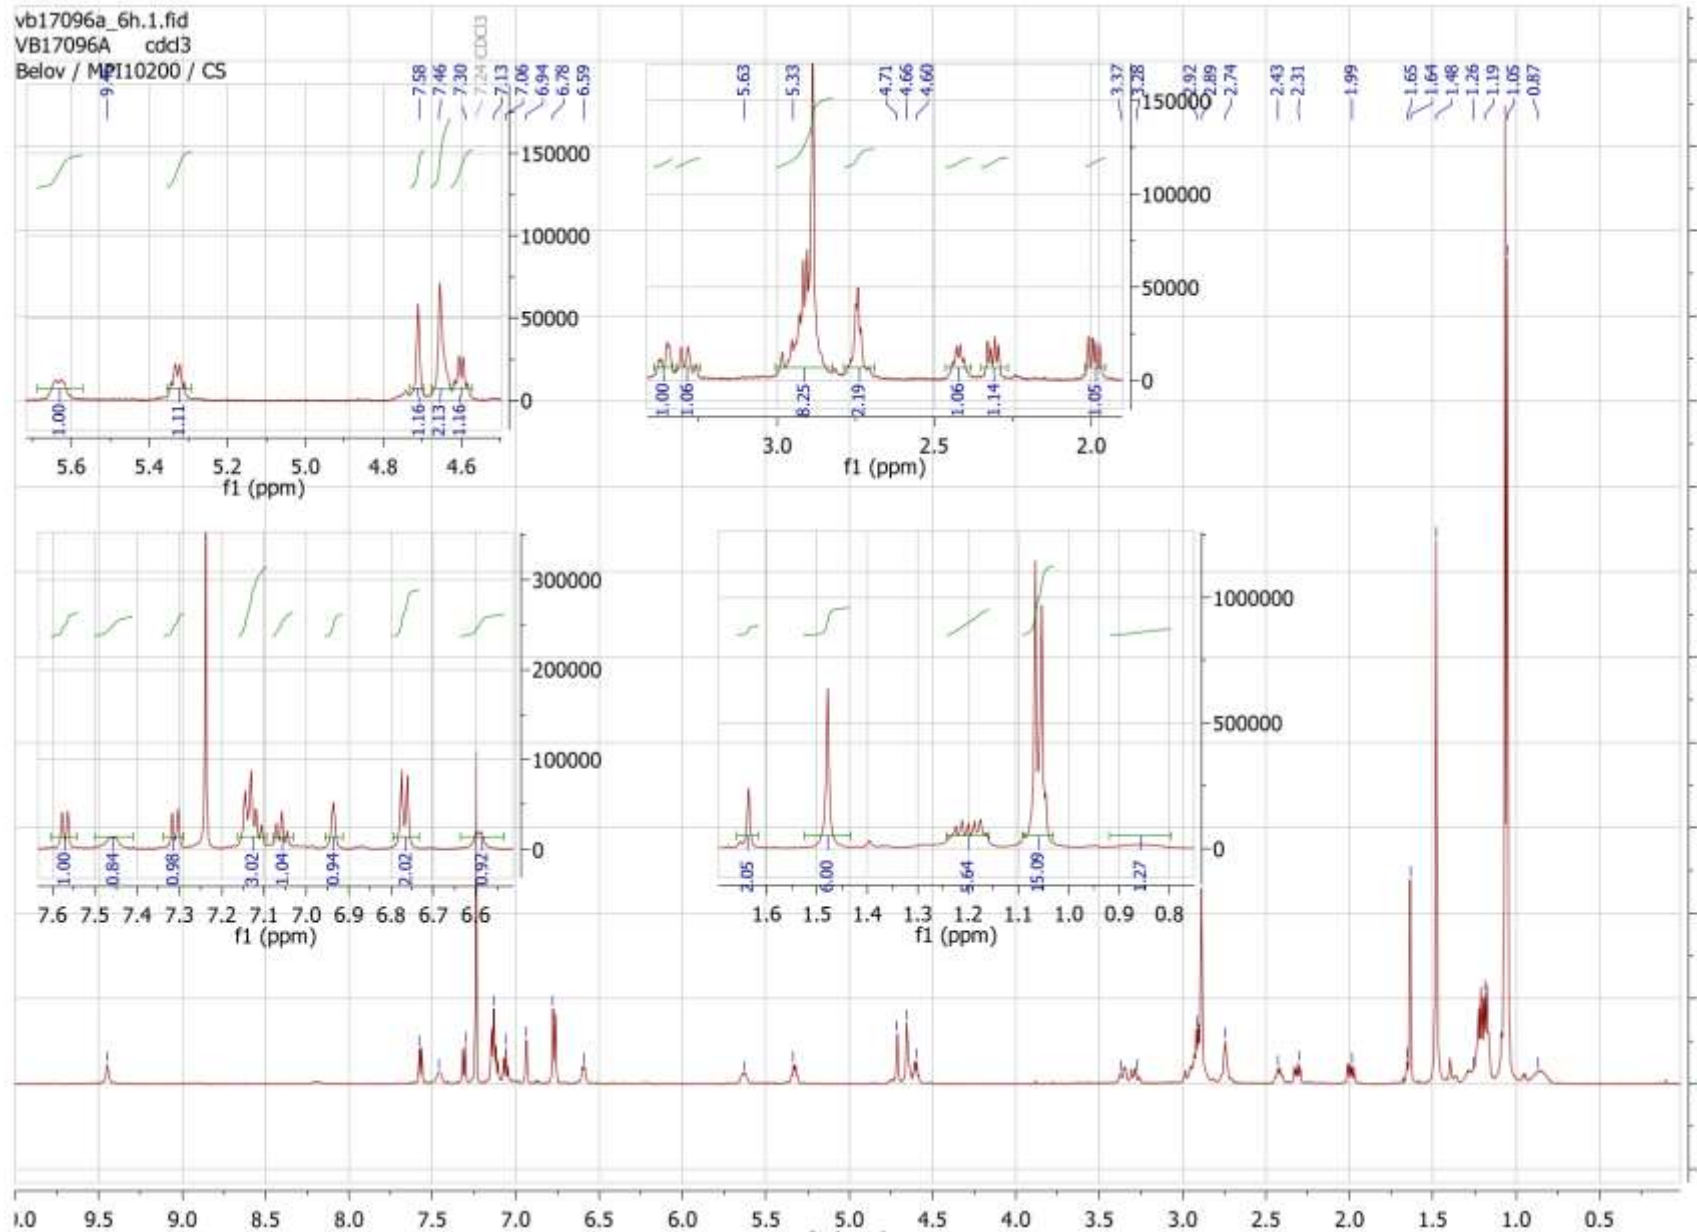

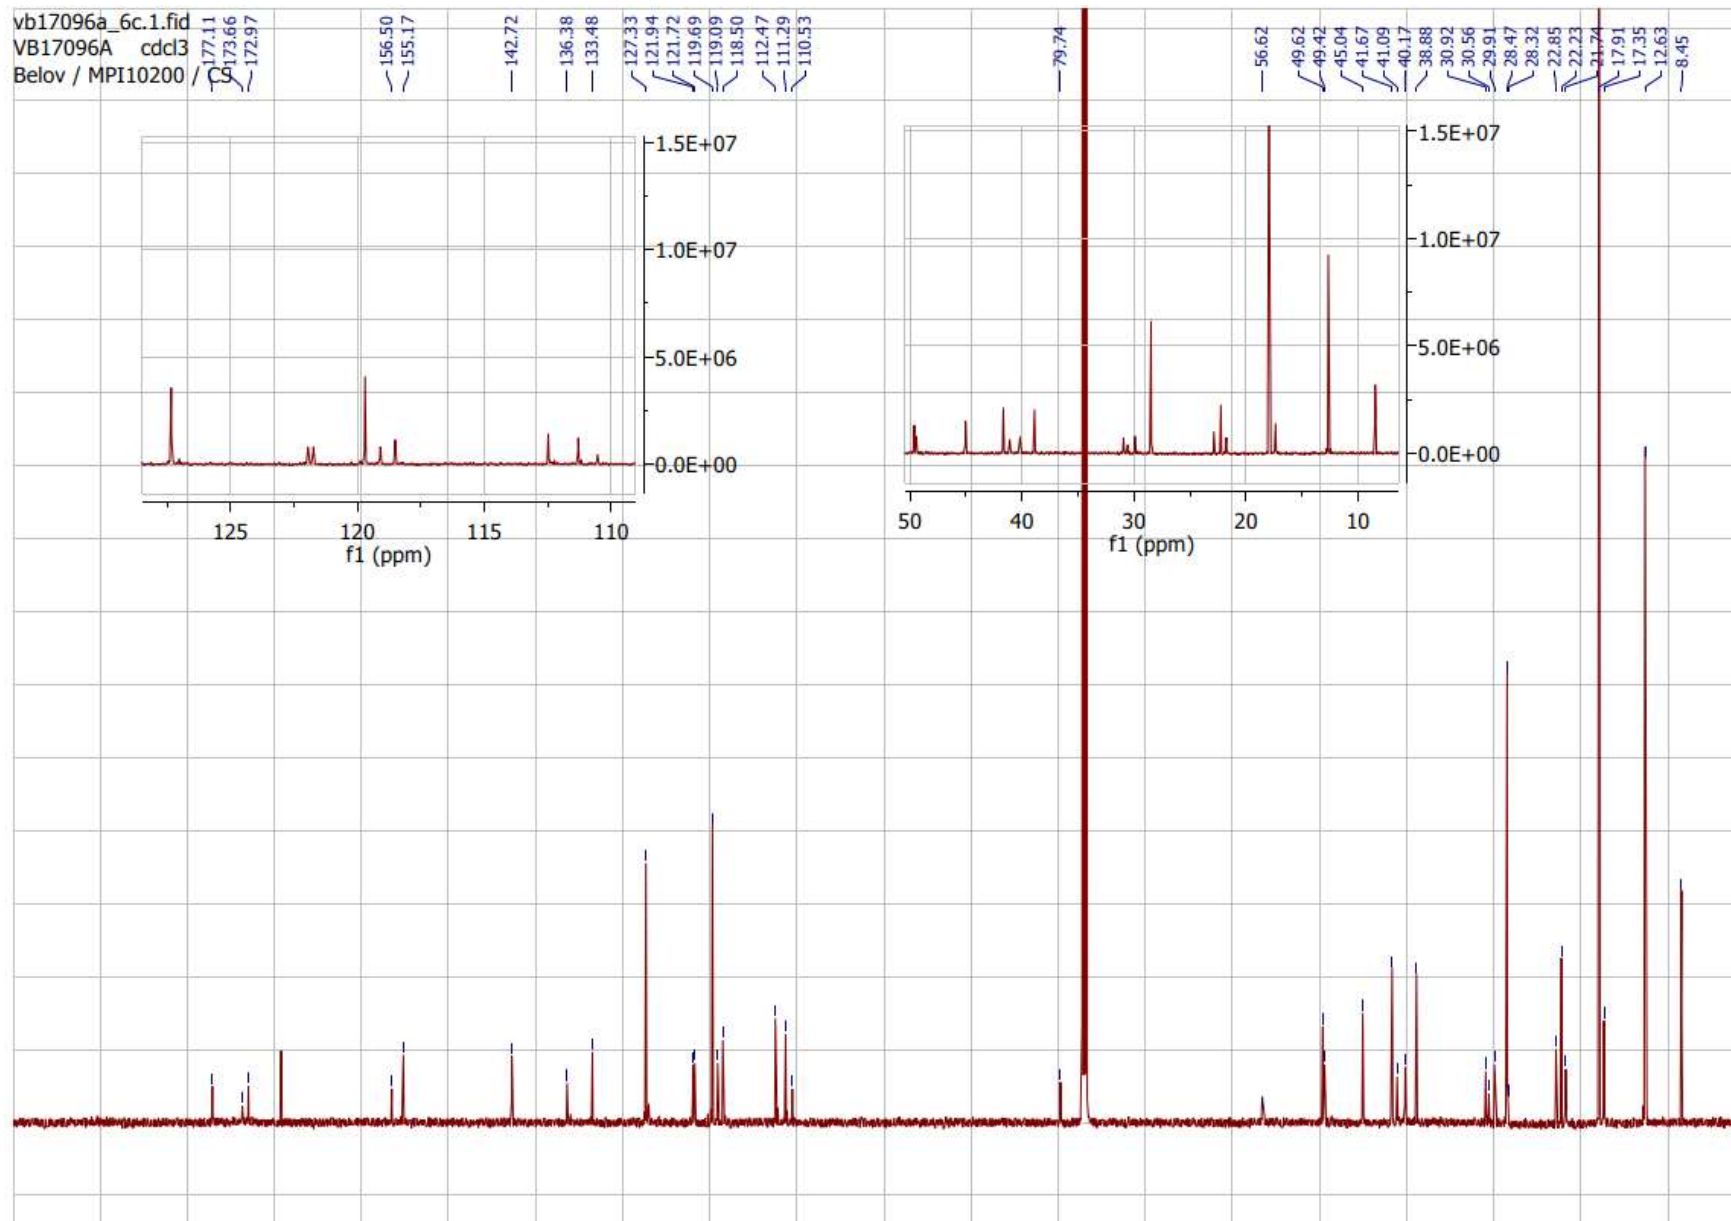

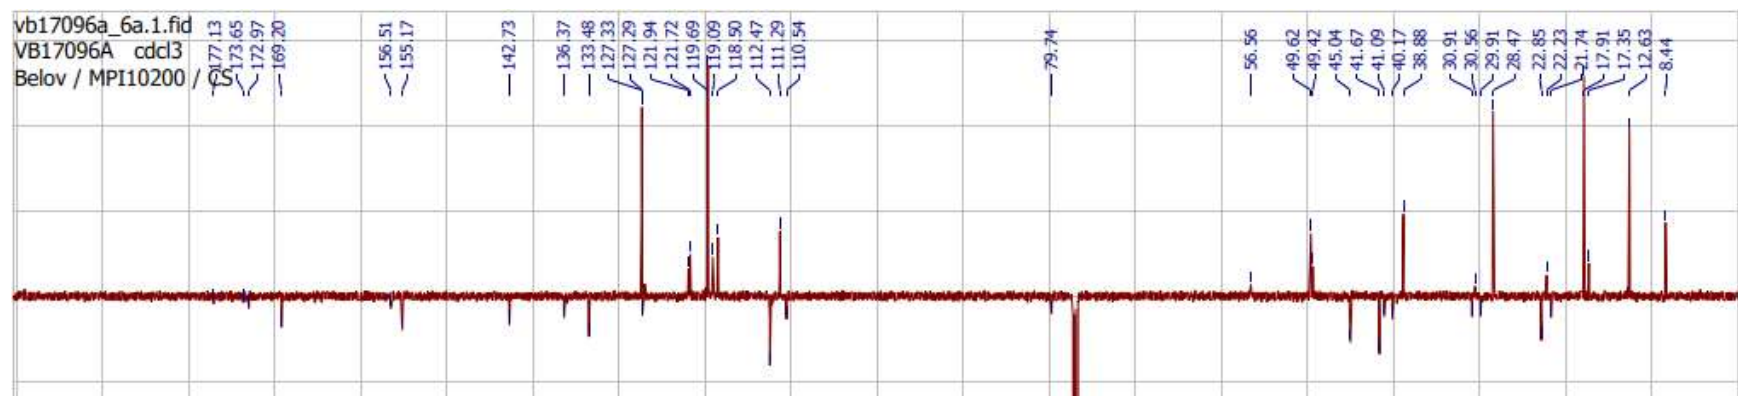

vb17096a\_6h-cosy.1.ser  
VB17096A cdcl3  
Below / MPI10200 / mw

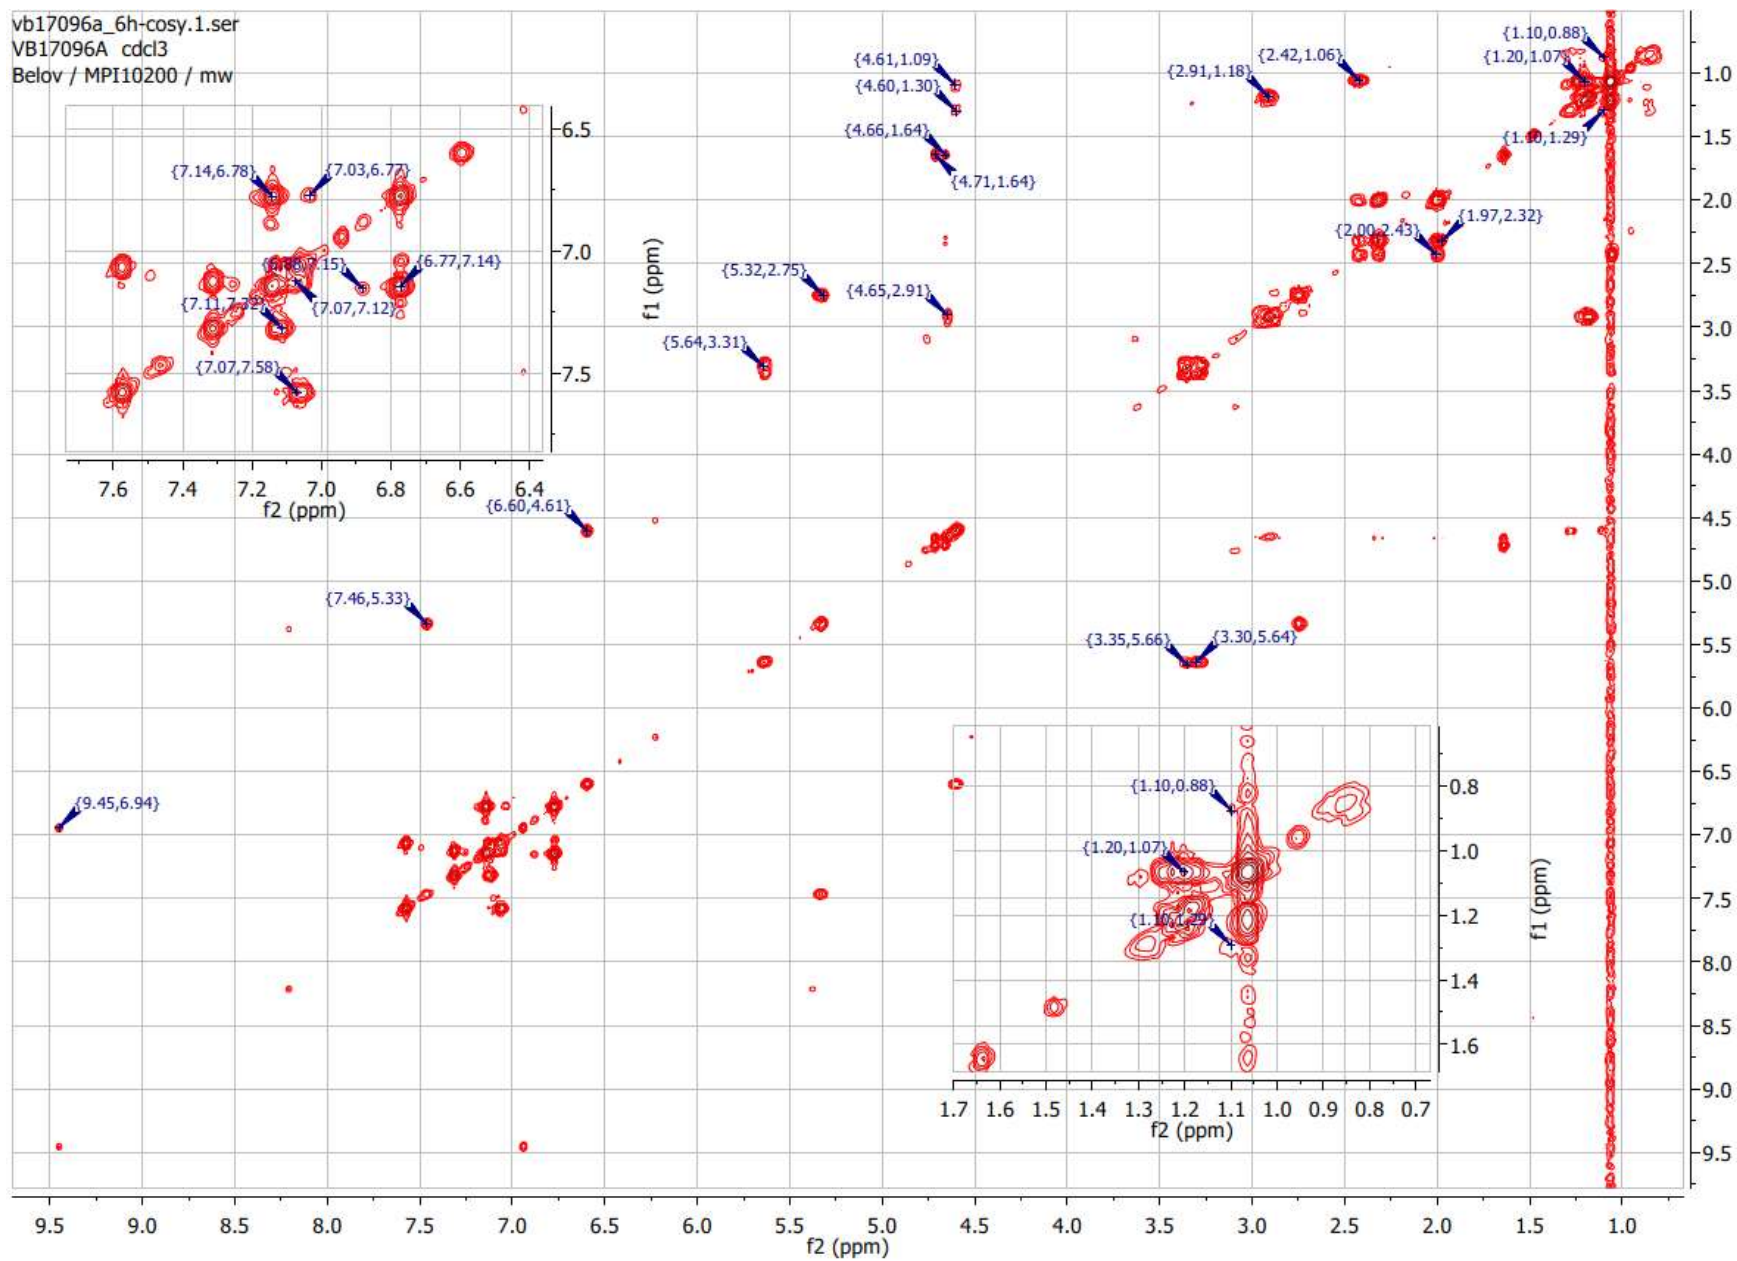

vb17096a\_6ch-hsqc.1.ser  
VB17096A cdcl3  
Belov / MPI10200 / mw

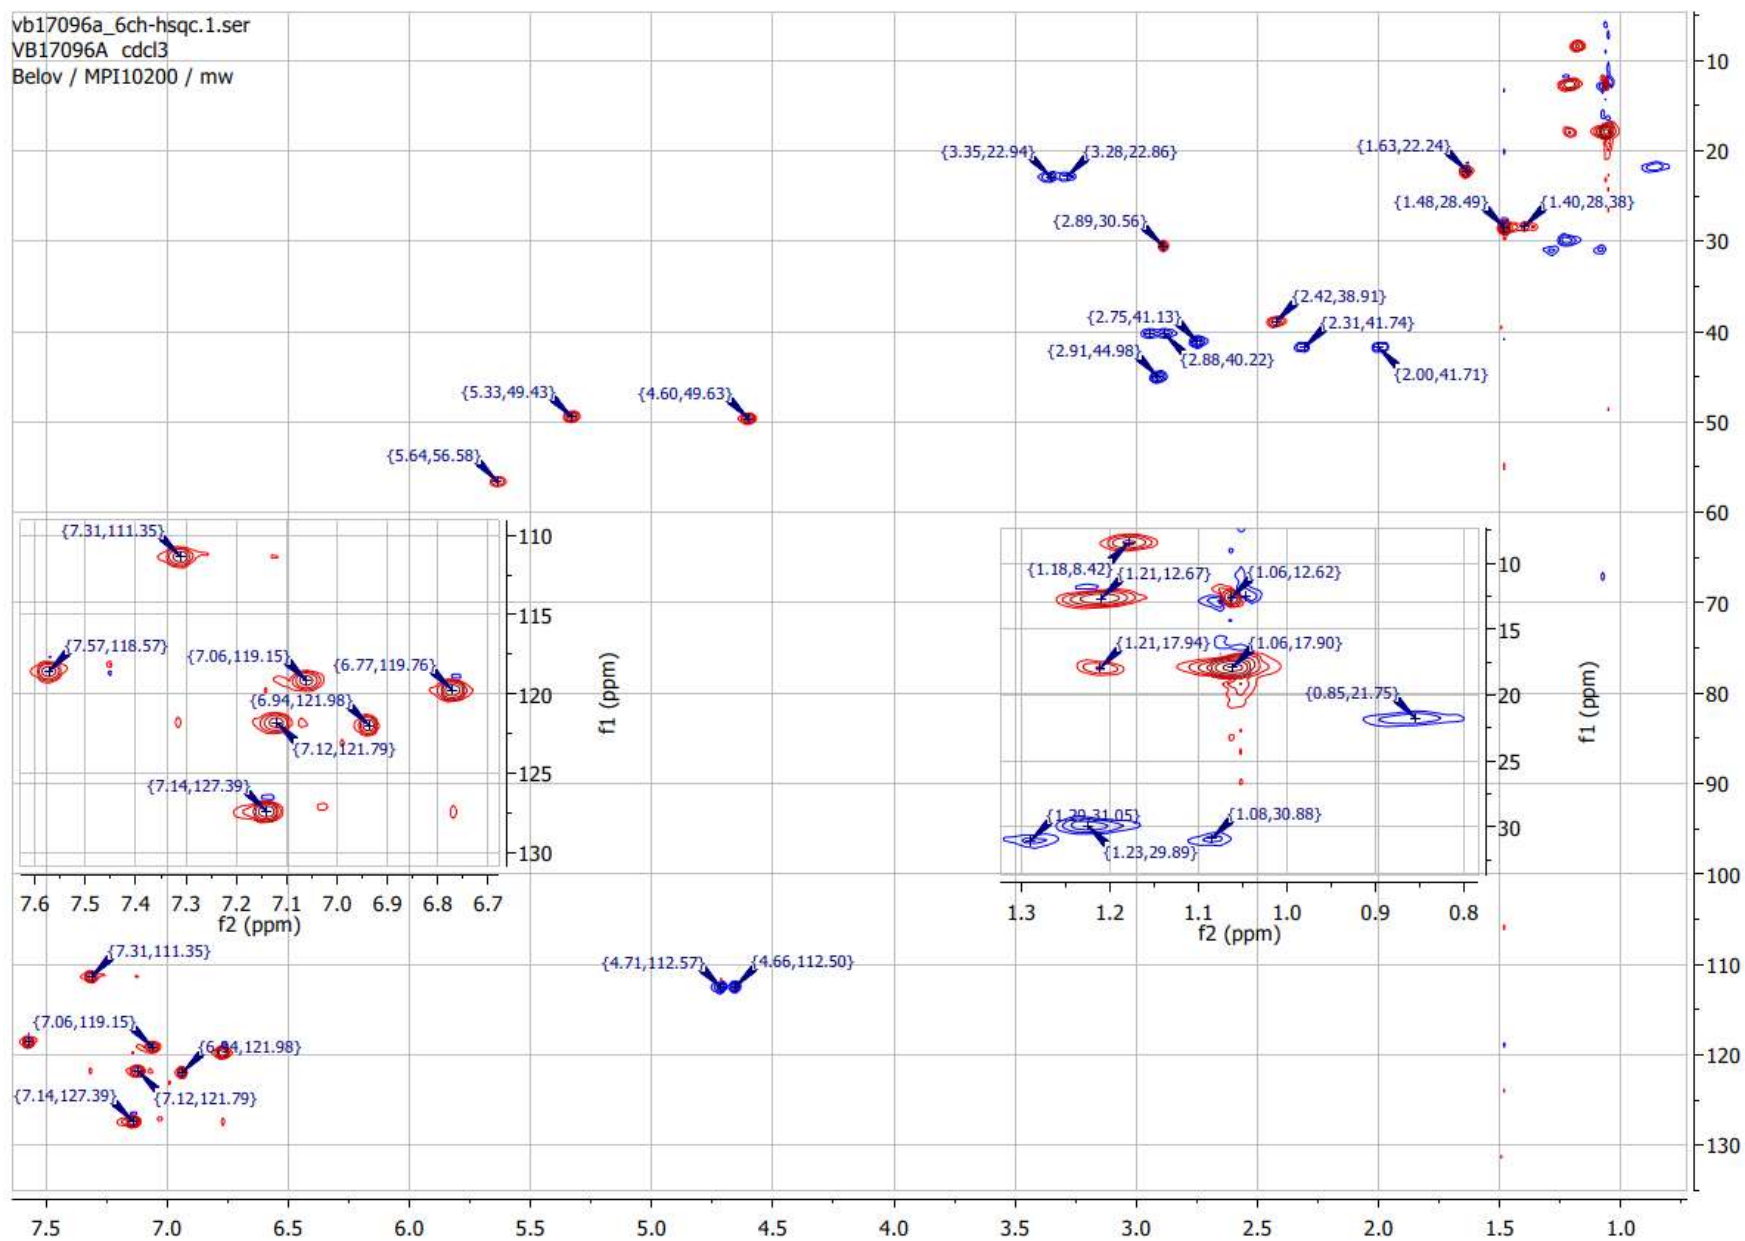

**Figures S5a-c.** NMR spectra of compound **2** in [D<sub>6</sub>]DMSO: <sup>1</sup>H (400 MHz), <sup>13</sup>C{<sup>1</sup>H} (101 MHz) and APT (CH/CH<sub>3</sub> +, C<sub>q</sub>/CH<sub>2</sub> -).

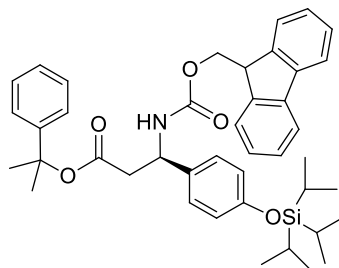

<sup>1</sup>H NMR (400 MHz, DMSO-*d*<sub>6</sub>) δ 7.84 (dt, *J* = 7.7, 0.9 Hz, 2H), 7.75 (d, *J* = 8.8 Hz, 1H), 7.65 (d, *J* = 7.5 Hz, 2H), 7.38 (dtd, *J* = 7.5, 4.3, 3.8, 1.7 Hz, 2H), 7.32 – 7.13 (m, 9H), 6.86 – 6.75 (m, 2H), 4.92 (q, *J* = 8.1 Hz, 1H), 4.33 (dt, *J* = 6.4, 3.3 Hz, 2H), 4.19 (t, *J* = 6.8 Hz, 1H), 2.73 (qd, *J* = 15.1, 7.8 Hz, 2H), 1.59 (s, 6H), 1.31 – 1.15 (m, 3H), 1.06 (d, *J* = 7.4 Hz, 18H).

vb17086\_PROTON\_01

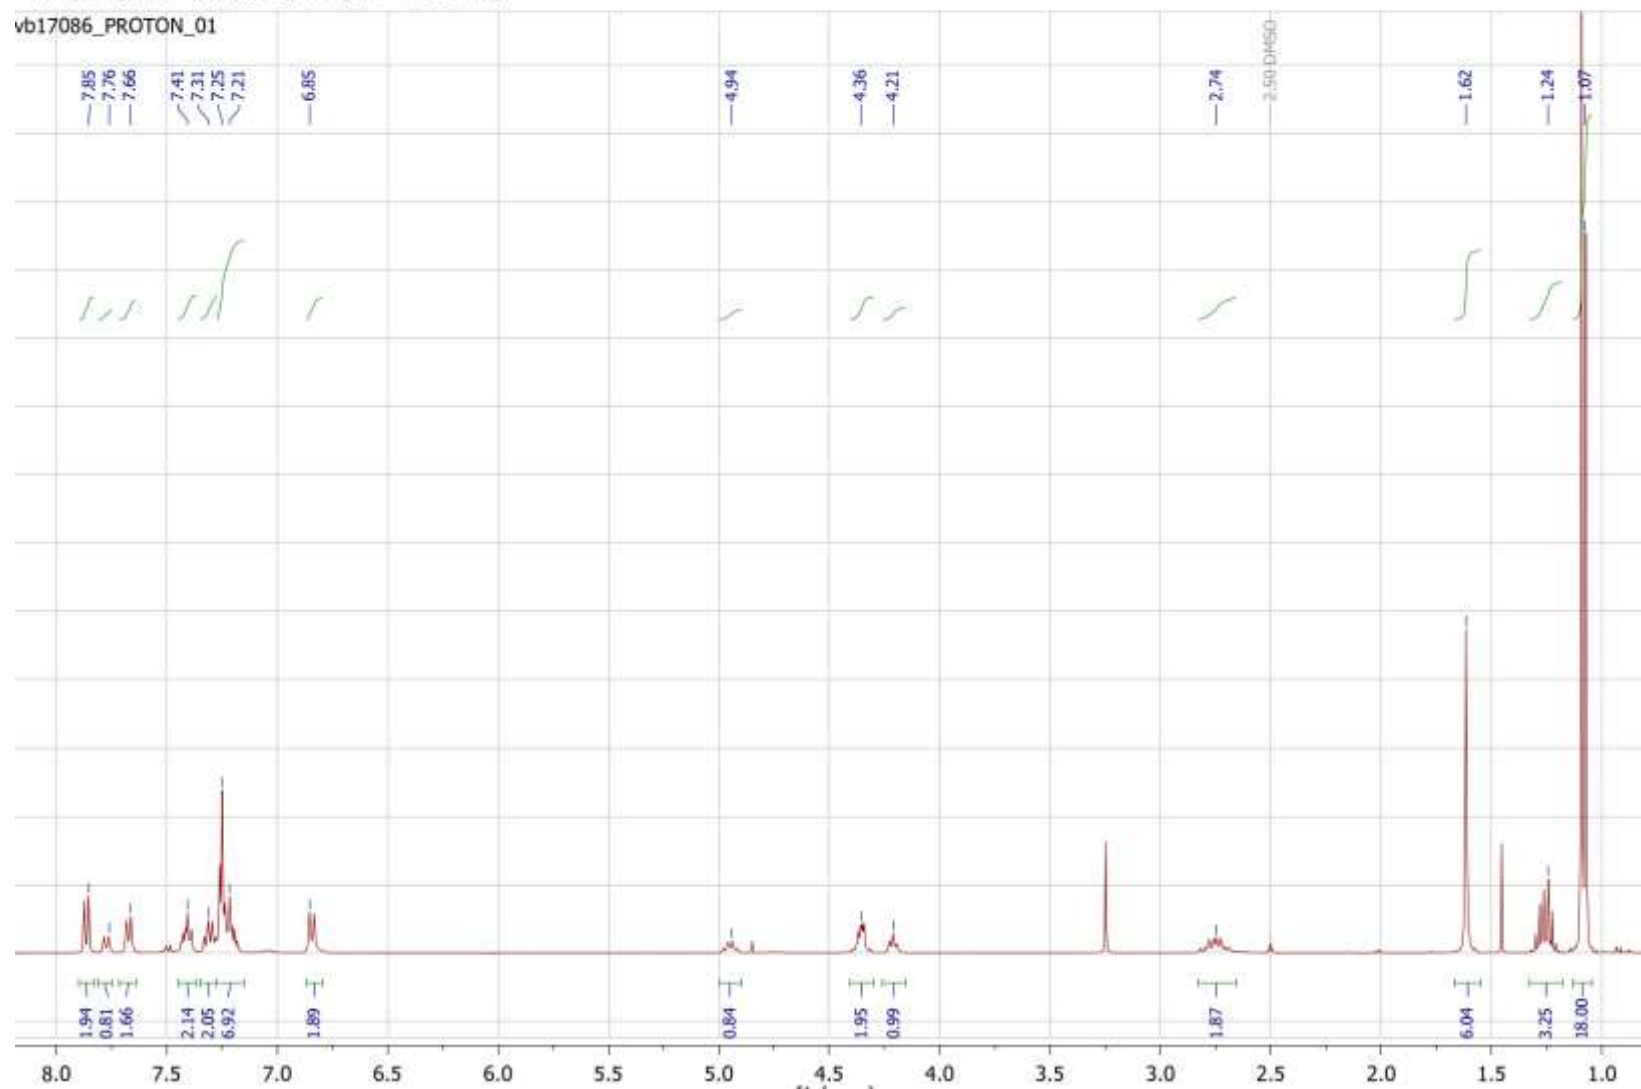

vb17086\_CARBO\_01

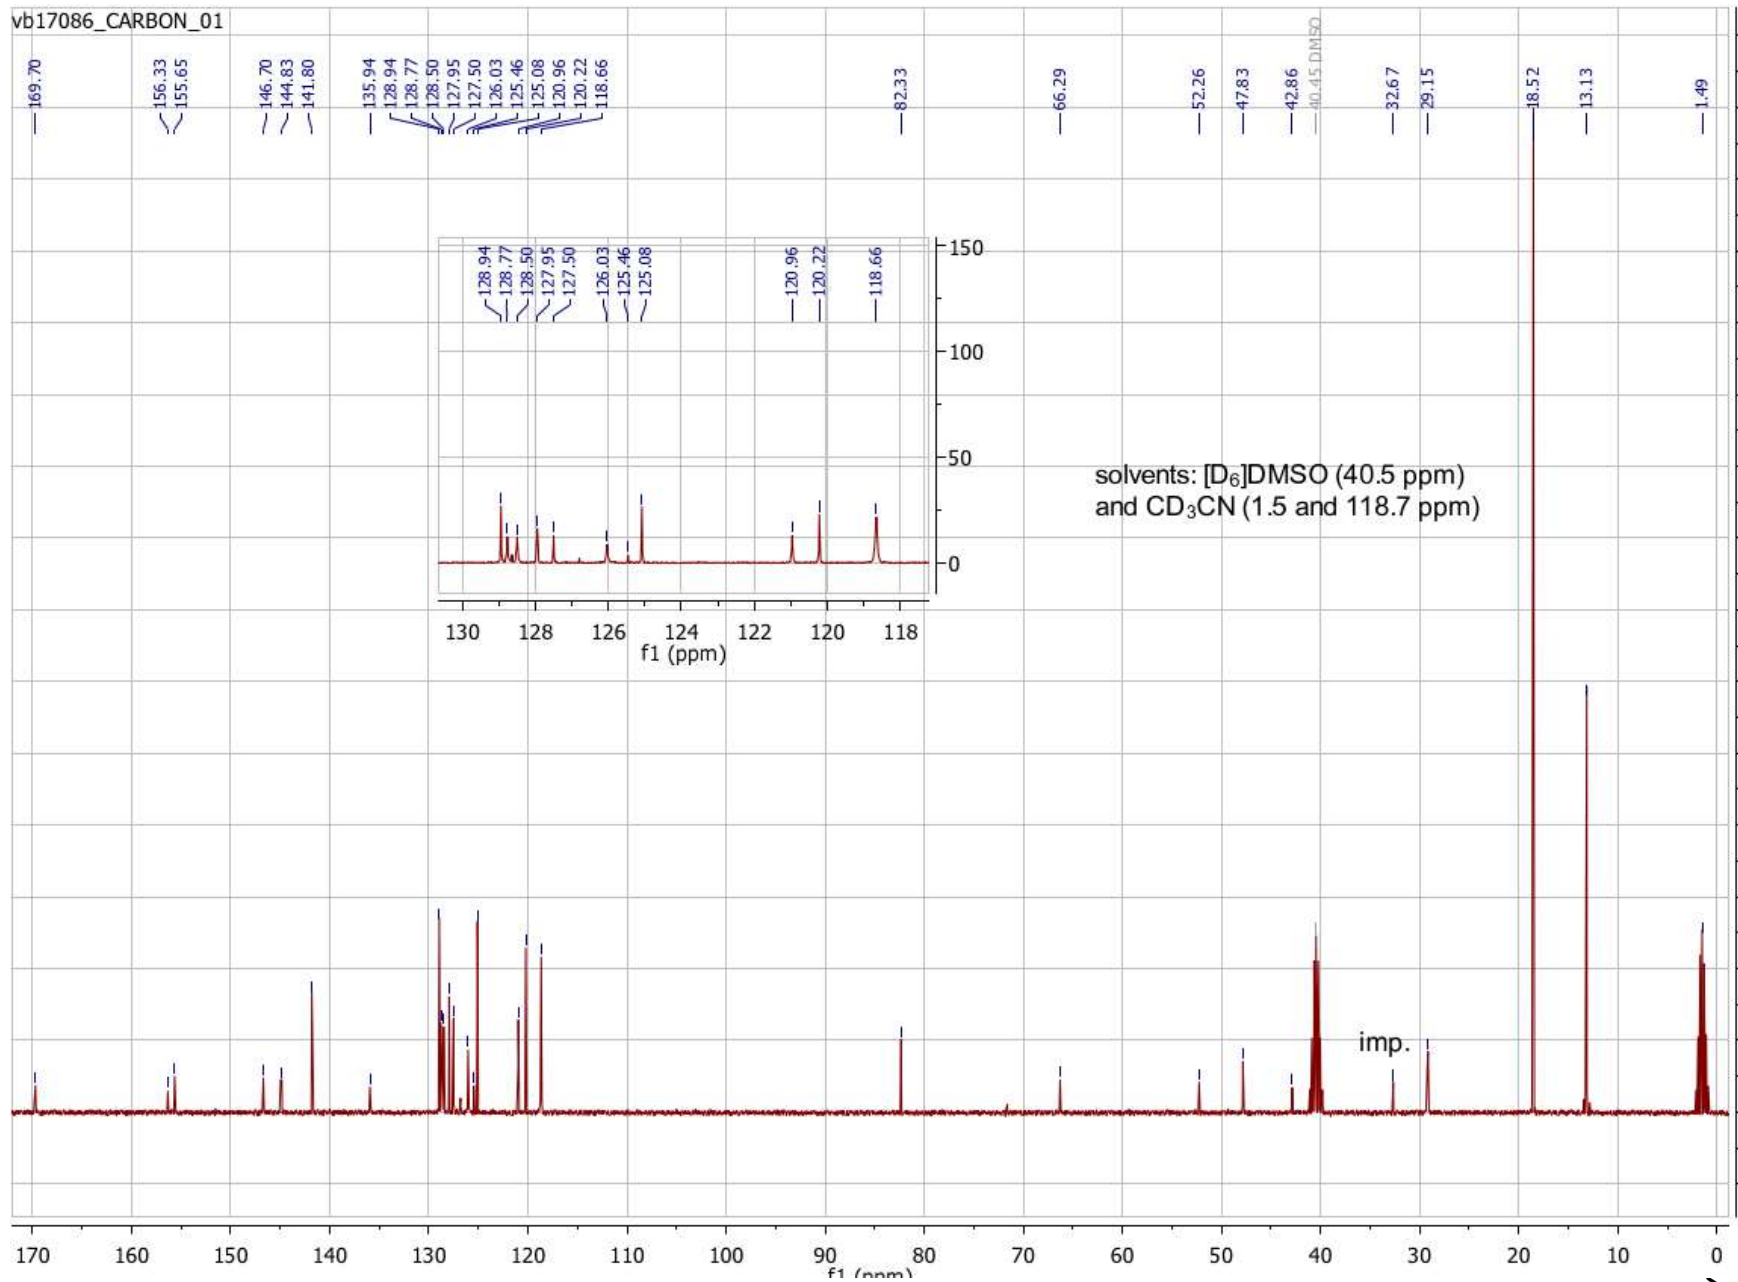



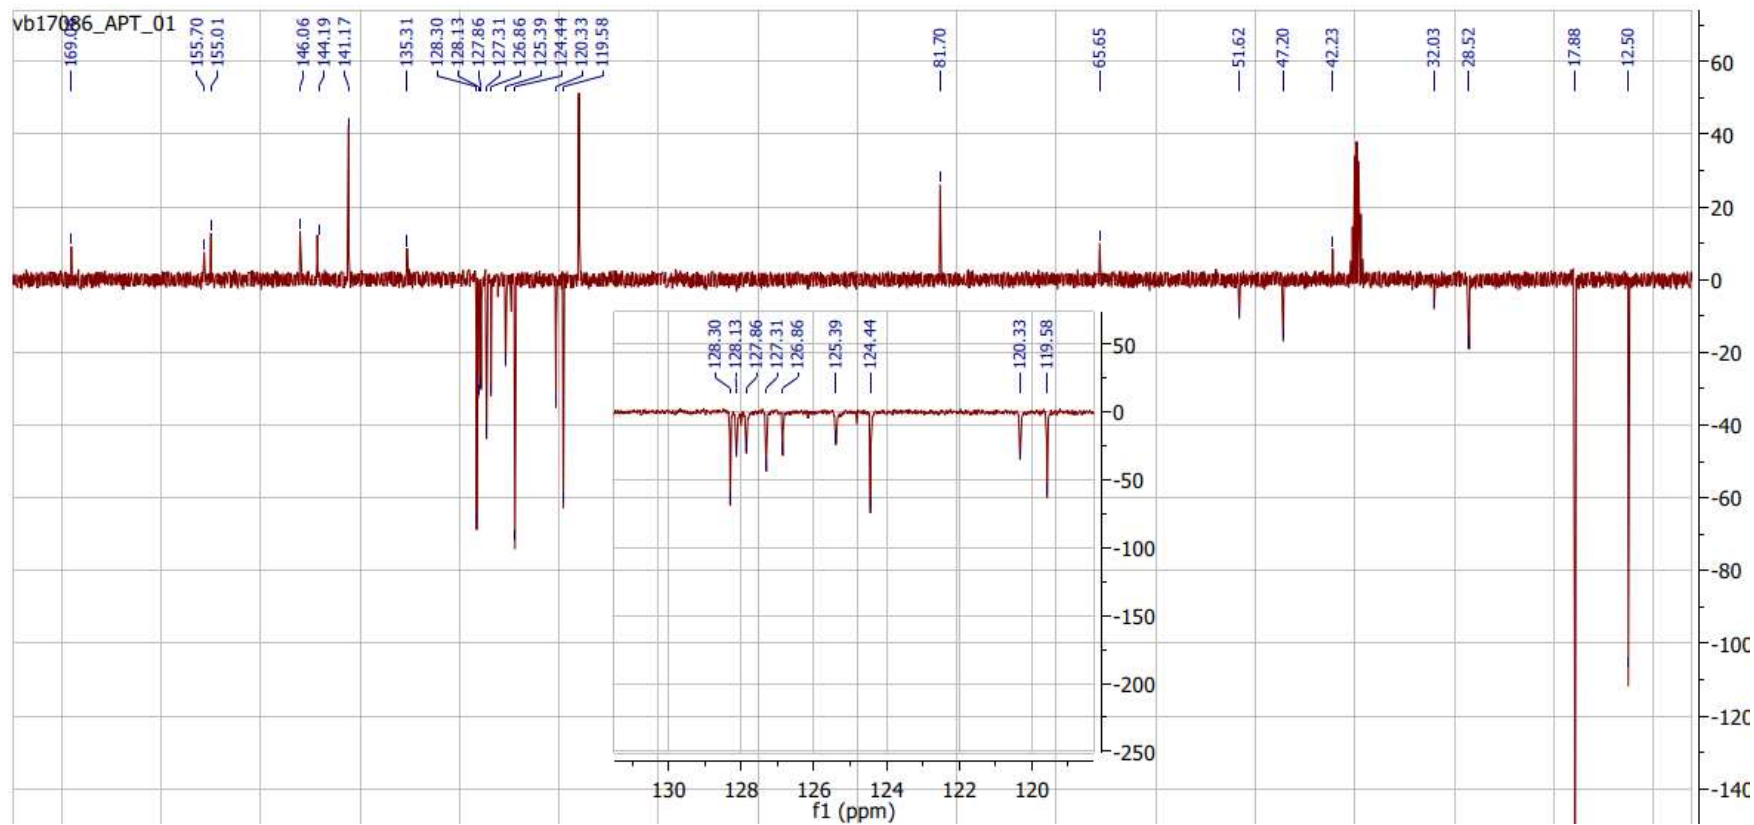

[D<sub>6</sub>]DMSO (40.5 ppm); <sup>13</sup>C-NMR and APT (101 MHz)

**Figures S6a-e.** NMR spectra of compound **3** in  $[D_3]MeCN$ :  $^1H$  (400 MHz),  $^{13}C\{^1H\}$  (101 MHz), APT (CH/CH<sub>3</sub> +, C<sub>q</sub>/CH<sub>2</sub> -),  $^1H$ - $^1H$ -, and  $^1H$ - $^{13}C$ -(HSQC) COSY.

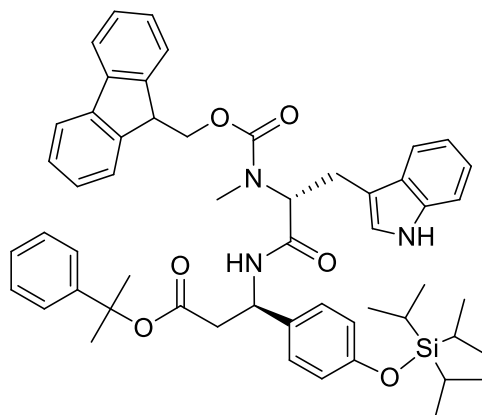

<sup>1</sup>H NMR (400 MHz, Acetonitrile-*d*<sub>3</sub>) δ 9.05 (d, *J* = 10.6 Hz, 1H), 7.79 (dd, *J* = 24.1, 7.9 Hz, 2H), 7.61 – 7.57 (m, 1H), 7.54 – 6.76 (m, 18H), 5.30 – 5.16 (m, 1H), 5.02 – 4.85 (m, 1H), 4.36 (s, 1H), 4.17 (d, *J* = 8.2 Hz, 1H), 3.93 (d, *J* = 12.1 Hz, 0H), 3.78 (s, 1H), 3.34 (d, *J* = 11.8 Hz, 1H), 3.09 – 2.94 (m, 1H), 2.84 – 2.76 (m, 1H), 2.74 (s, 3H), 1.65 – 1.50 (m, 6H), 1.31 – 1.15 (m, 3H), 1.09 (d, *J* = 7.3 Hz, 16H).

vb17089-2\_PROTON\_01

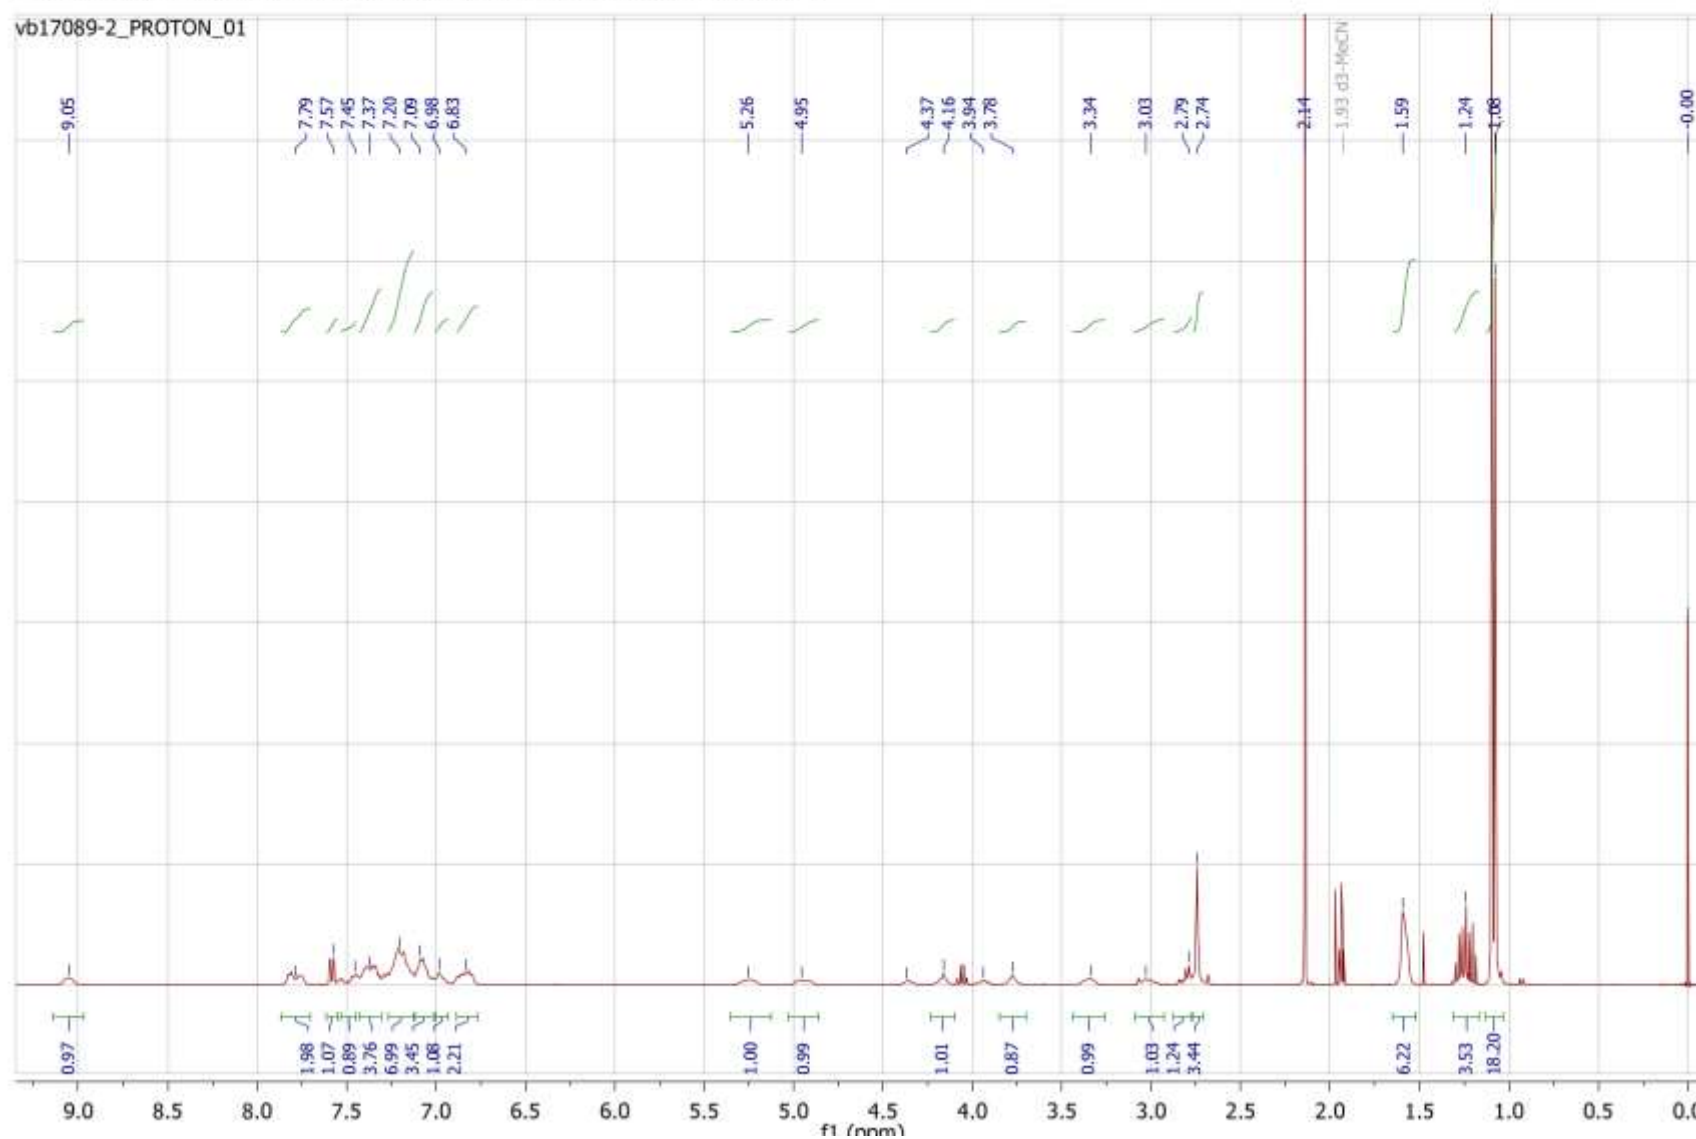

vb17089-2\_CARBON\_01

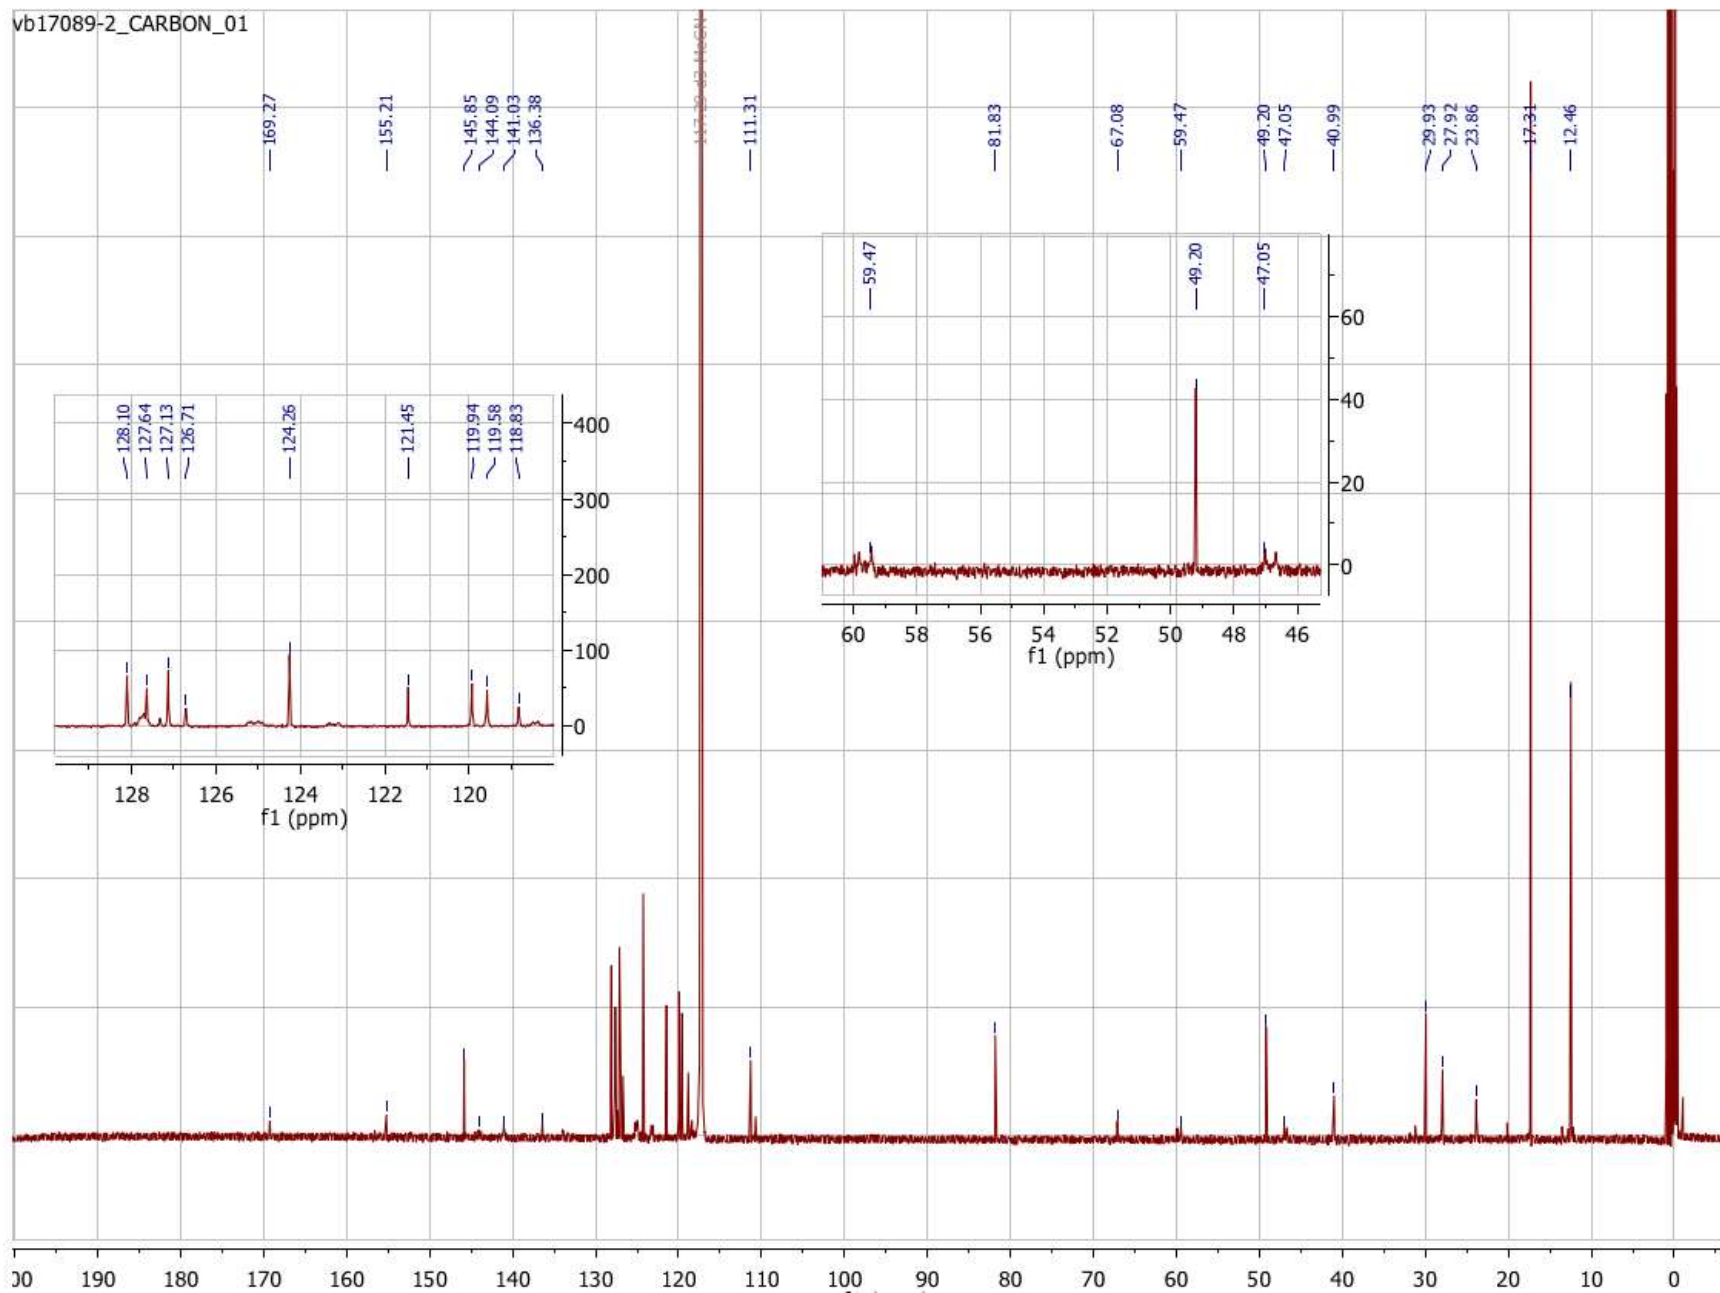

vb17089-2\_APT\_01

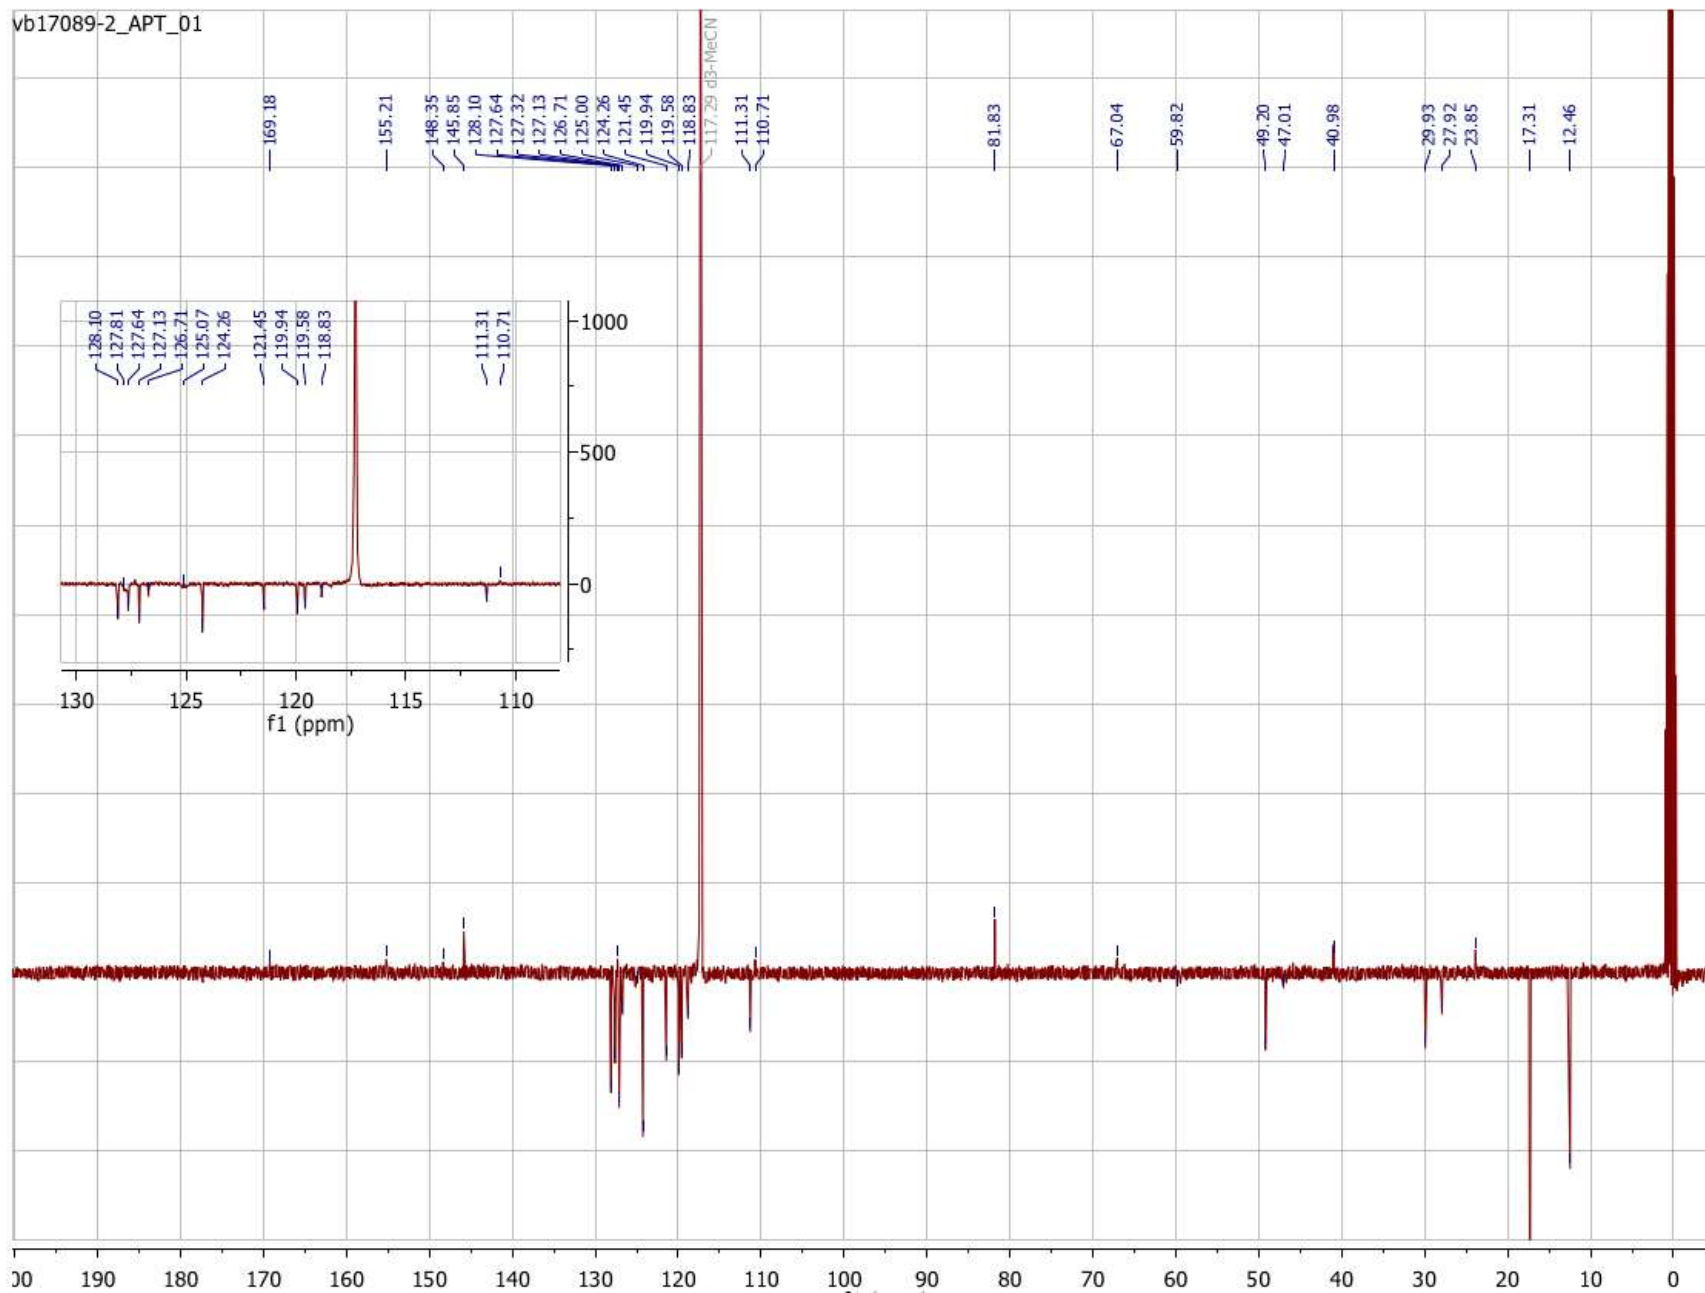

vb17089-2\_gCOSY\_01

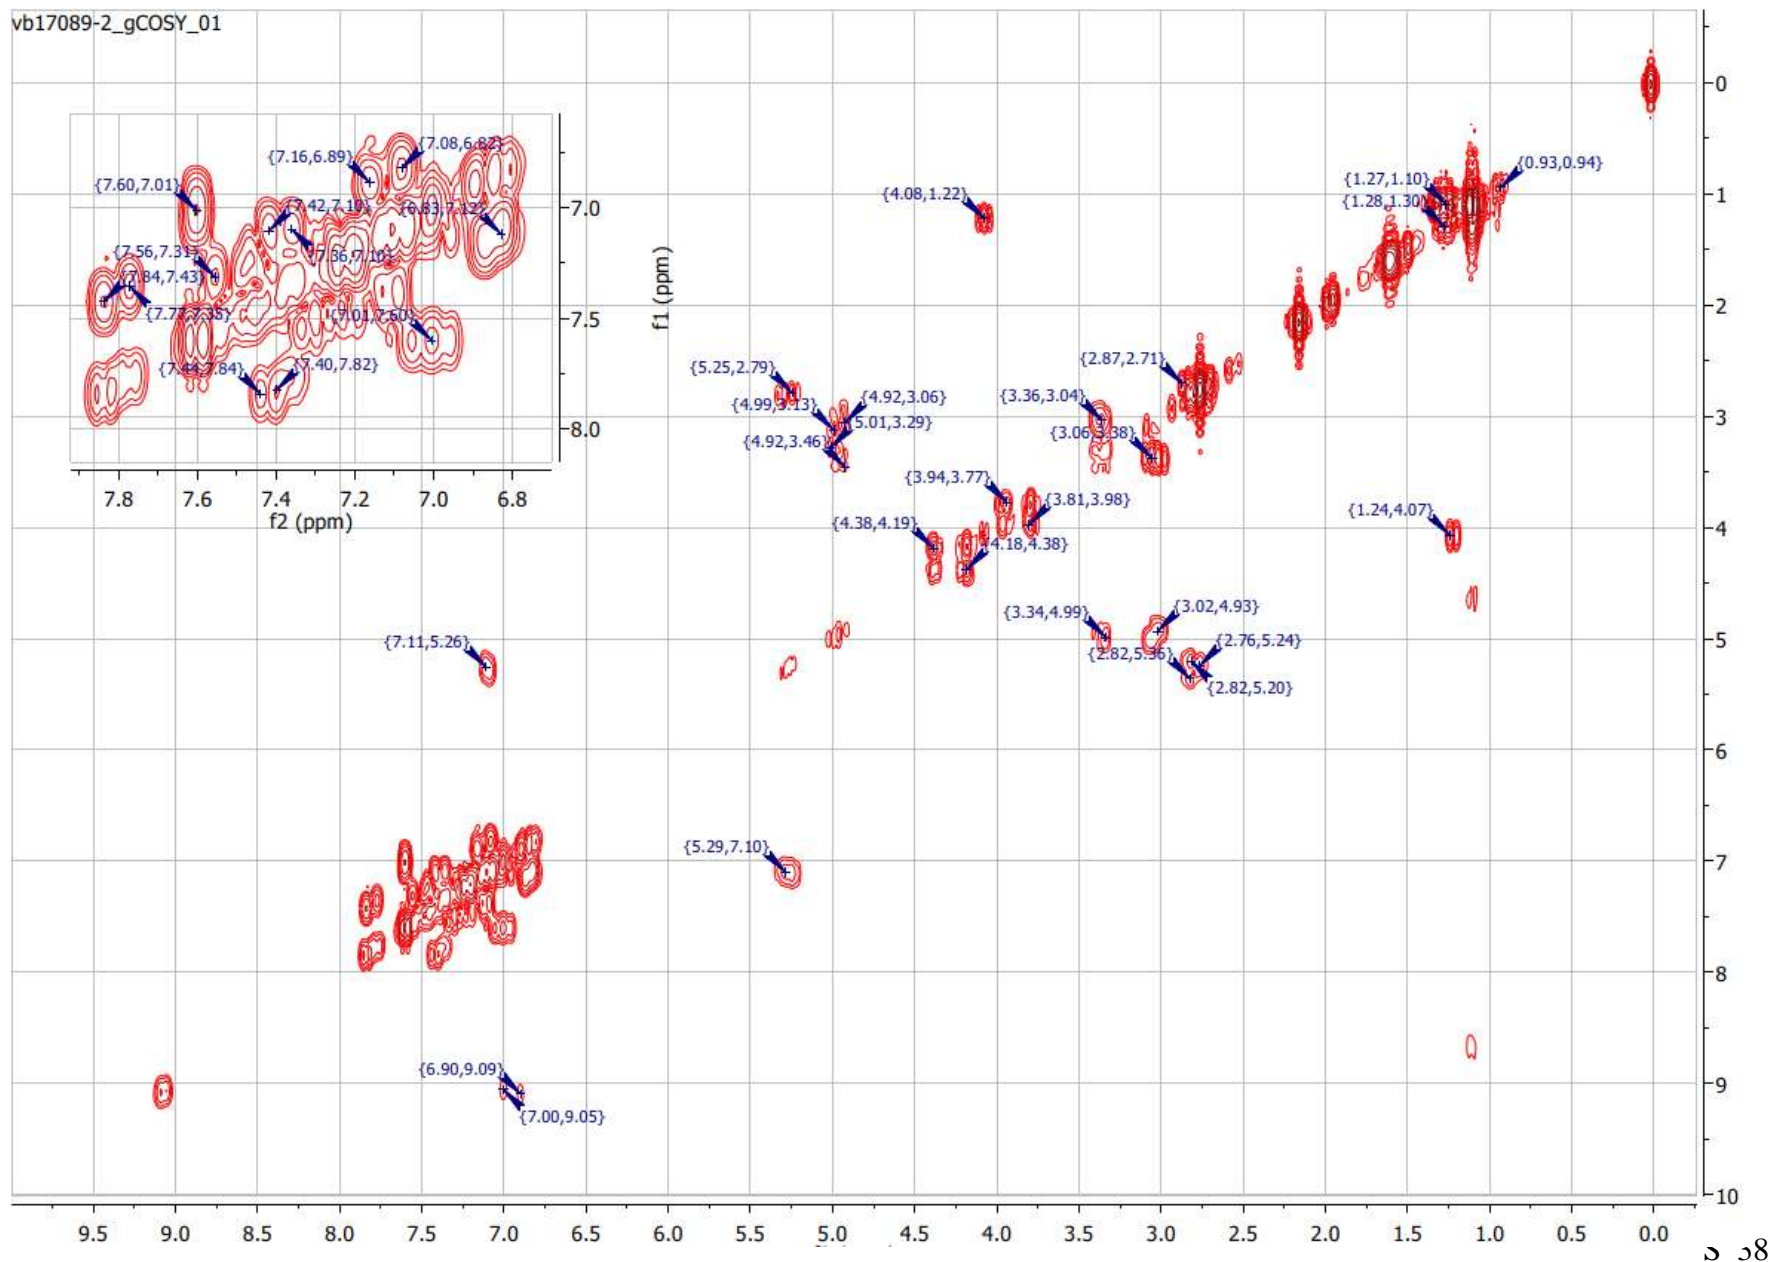

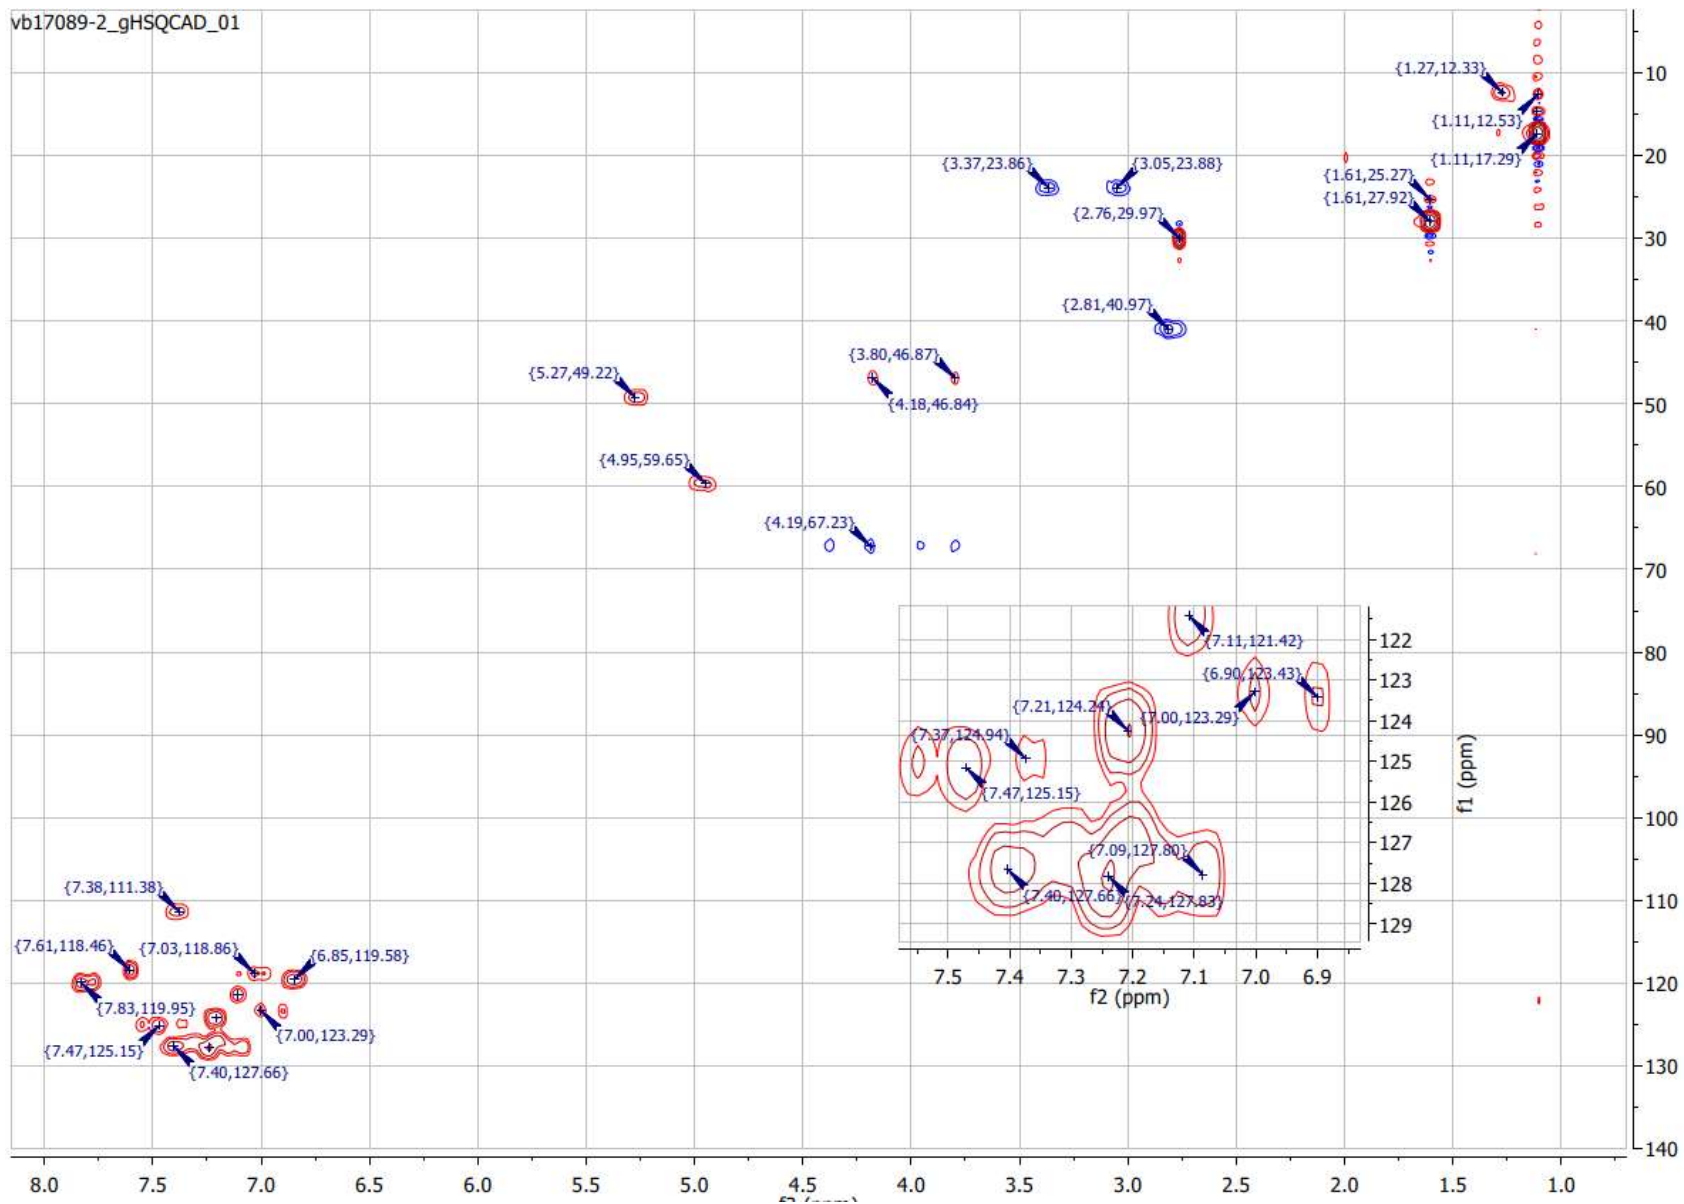

**Figures S7a-e.** NMR spectra of compound **4** in CDCl<sub>3</sub>: <sup>1</sup>H (400 MHz), <sup>13</sup>C{<sup>1</sup>H} (101 MHz), APT (CH/CH<sub>3</sub> +, C<sub>q</sub>/CH<sub>2</sub> -), <sup>1</sup>H-<sup>1</sup>H-, and <sup>1</sup>H-

<sup>13</sup>C- (HSQC) COSY.

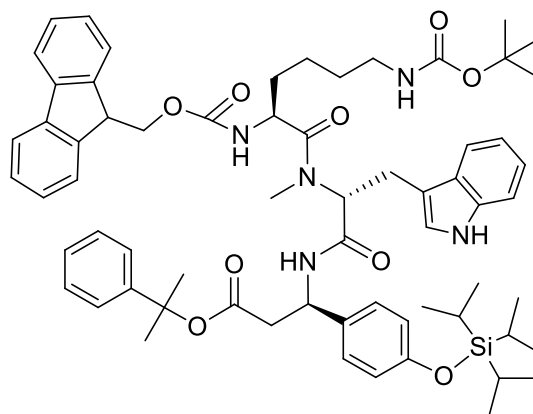



$^1\text{H NMR}$  (400 MHz, Chloroform- $d$ )  $\delta$  9.62 (s, 1H), 7.74 (d,  $J=7.5$  Hz, 2H), 7.58 (d,  $J=7.7$  Hz, 1H), 7.51 (dd,  $J=7.5, 5.2$  Hz, 2H), 7.36 (ddd,  $J=19.7, 9.8, 5.3$  Hz, 3H), 7.30–7.02 (m, 12H), 6.94 (s, 1H), 6.83–6.70 (m, 2H), 5.65 (dd,  $J=12.2, 4.6$  Hz, 1H), 5.53 (d,  $J=6.6$  Hz, 1H), 5.37 (q,  $J=7.4$  Hz, 1H), 4.64 (s, 1H), 4.35 (dd,  $J=11.0, 7.1$  Hz, 2H), 4.23 (dd,  $J=10.5, 6.9$  Hz, 1H), 4.19–4.09 (m, 1H), 3.37 (dd,  $J=16.2, 4.6$  Hz, 1H), 3.24 (dd,  $J=16.1, 12.3$  Hz, 1H), 3.00–2.85 (m, 1H), 2.81 (dd,  $J=21.6, 6.8$  Hz, 1H), 2.71 (s, 3H), 1.81 (s, 1H), 1.64 (s, 3H), 1.62 (s, 4H), 1.52 (s, 9H), 1.47–1.32 (m, 1H), 1.30–1.15 (m, 5H), 1.07 (d,  $J=7.3$  Hz, 19H), 0.95–0.70 (m, 2H).

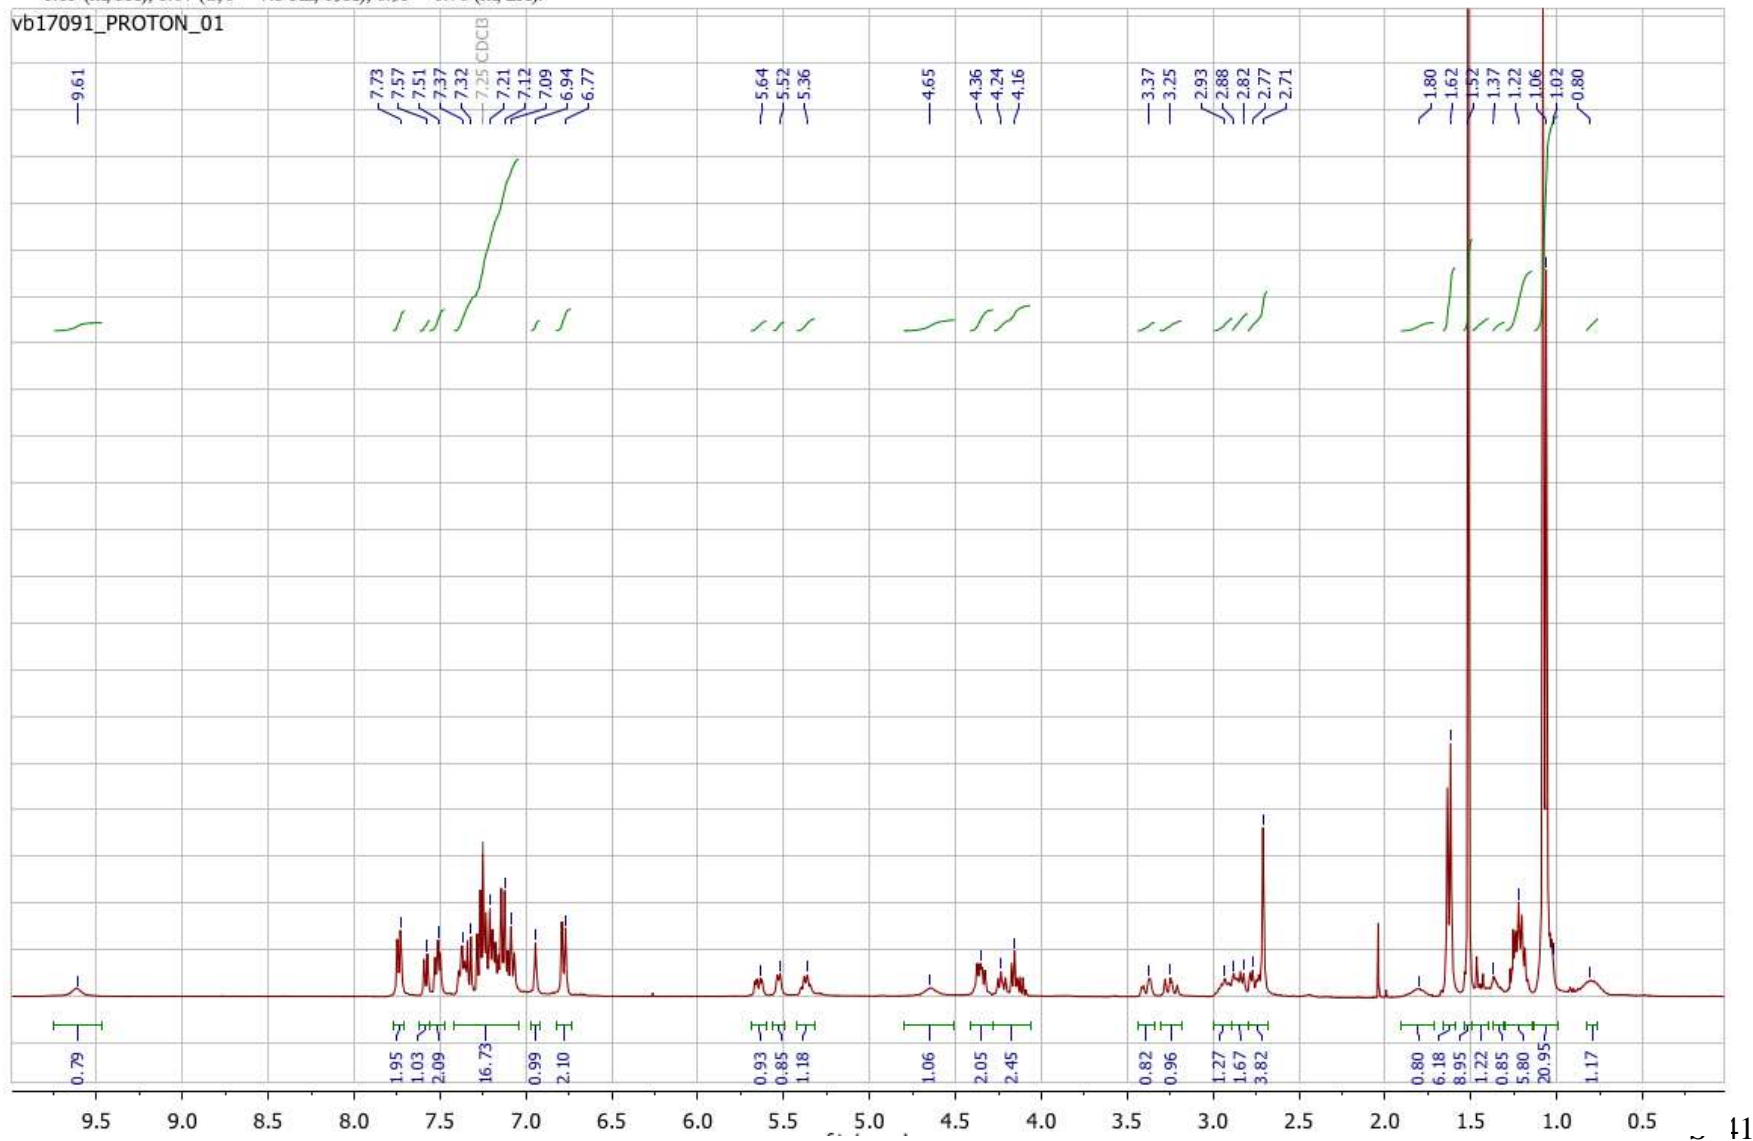

vt17091\_CARBON\_01

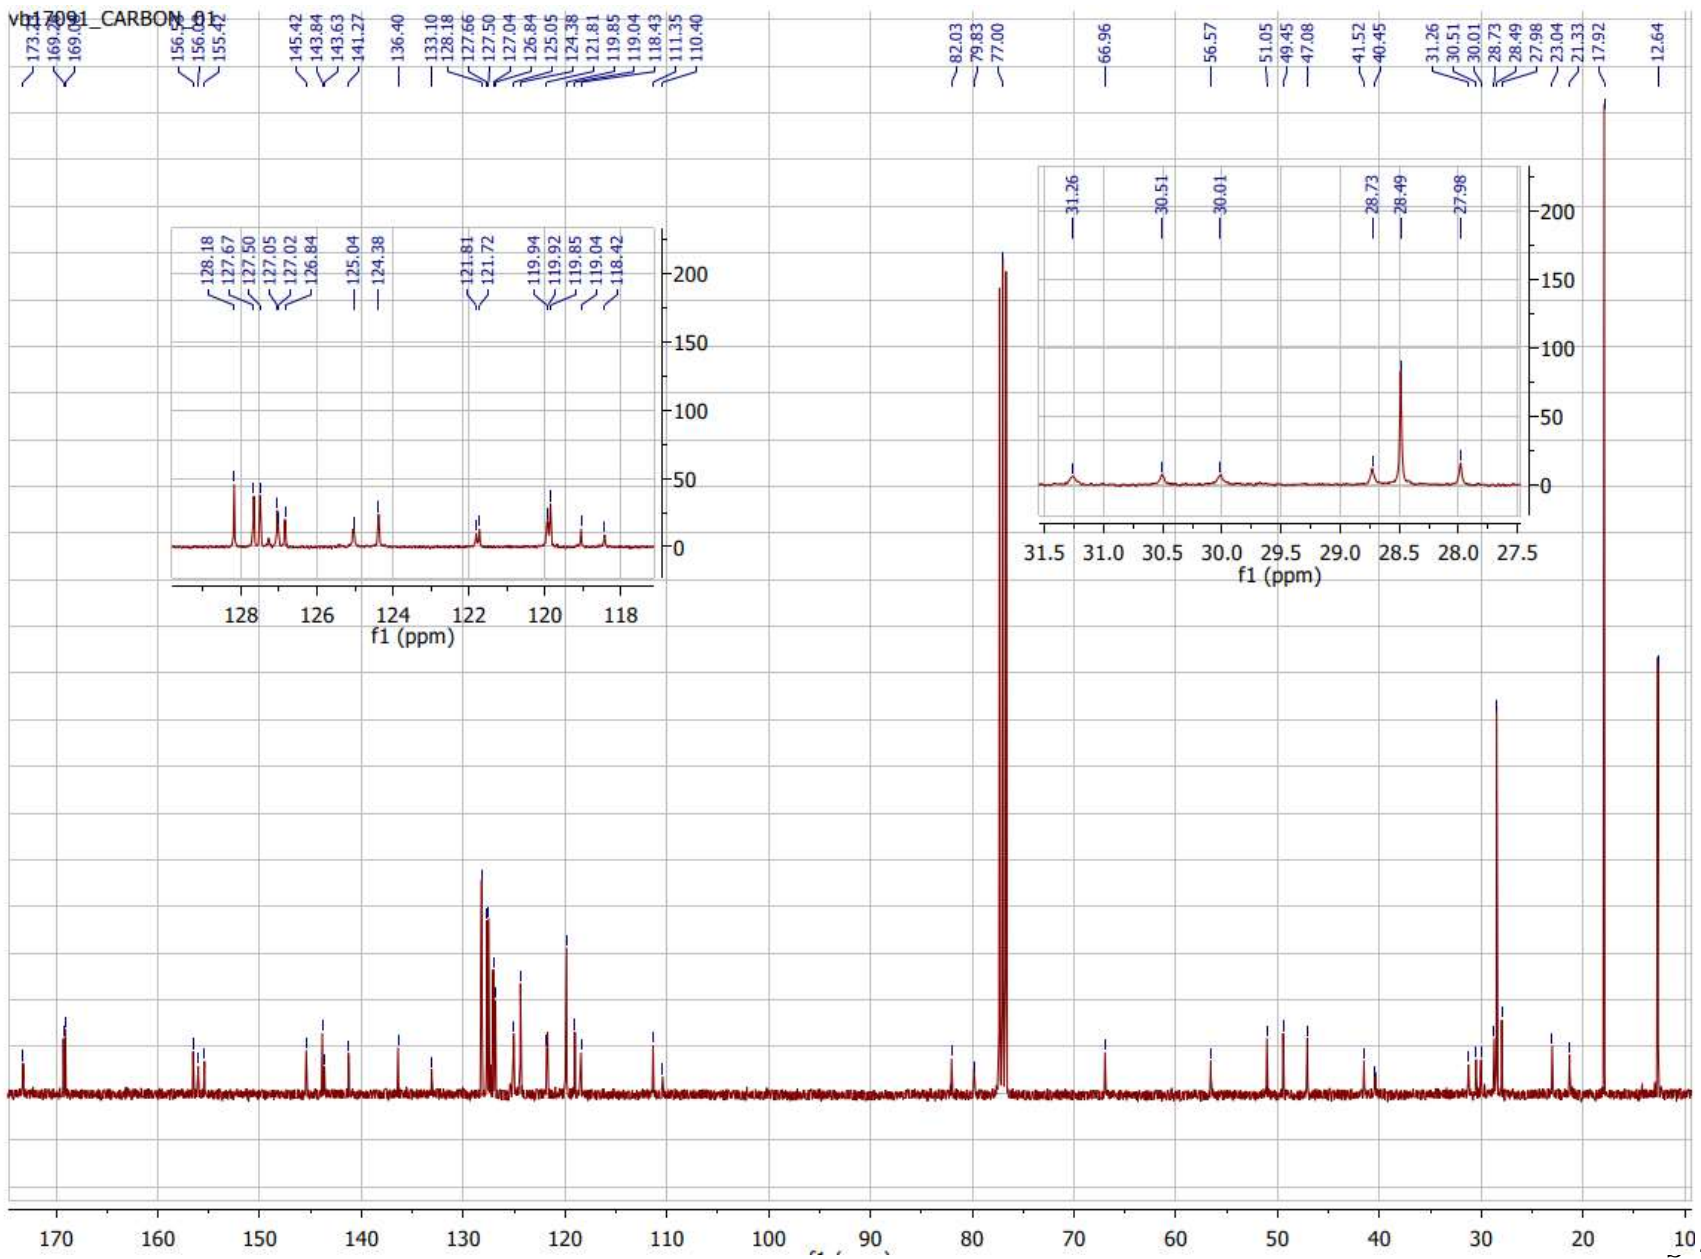

vb17091\_APT\_01

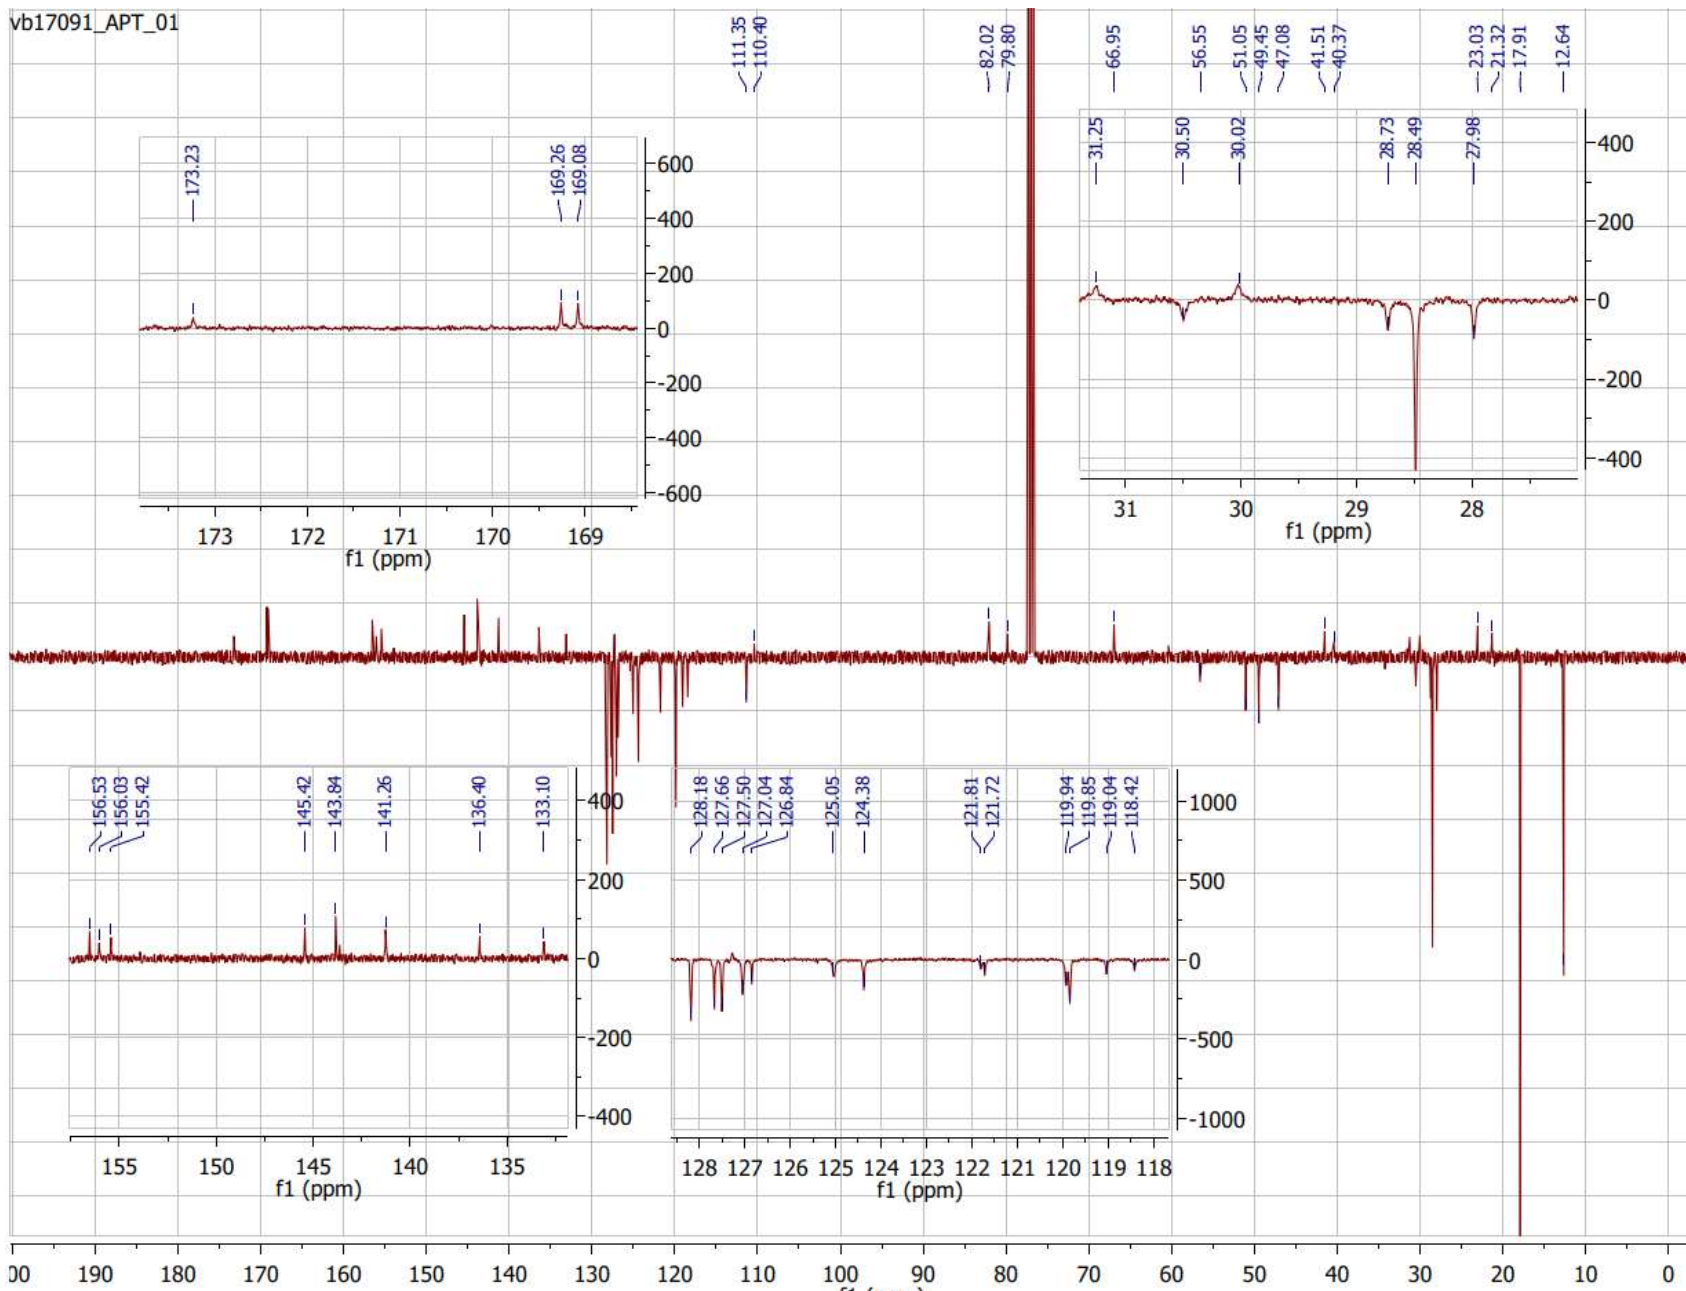

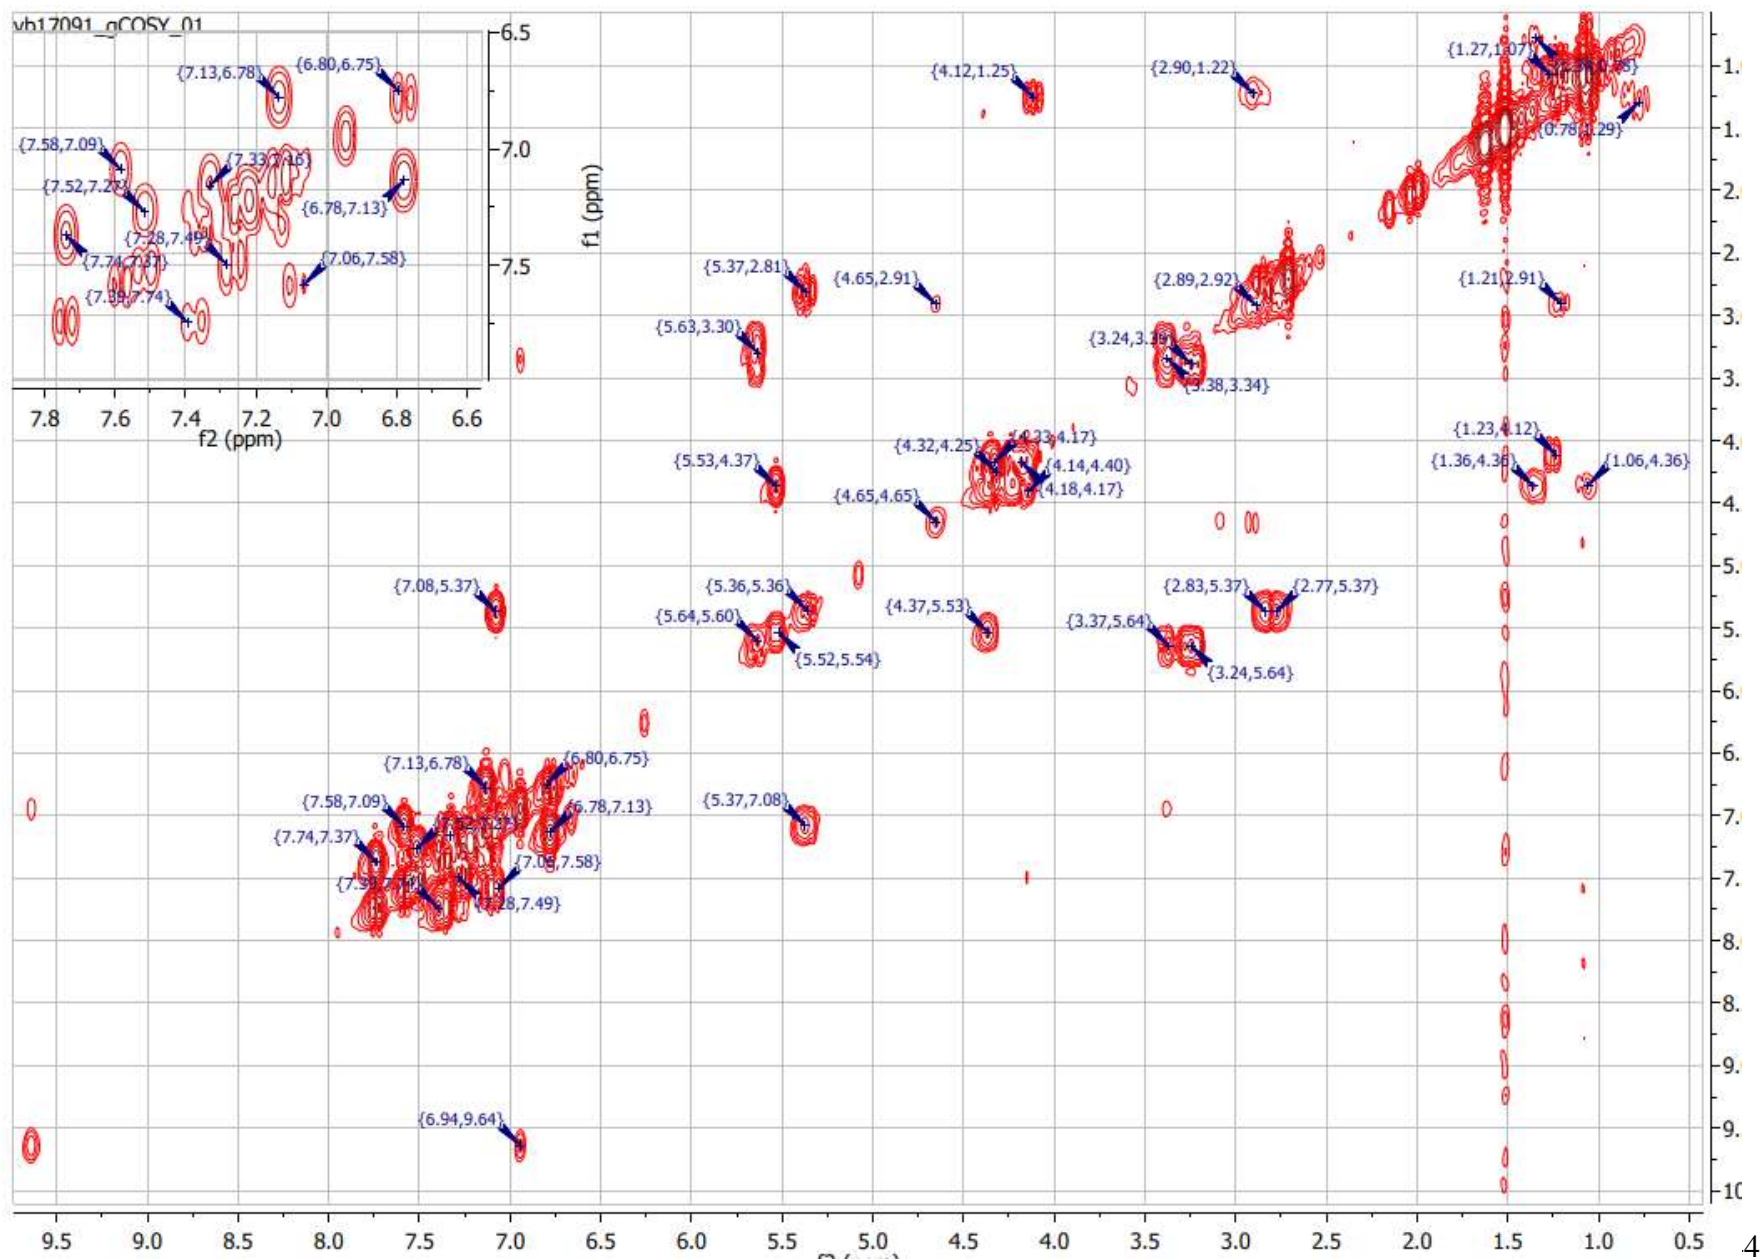

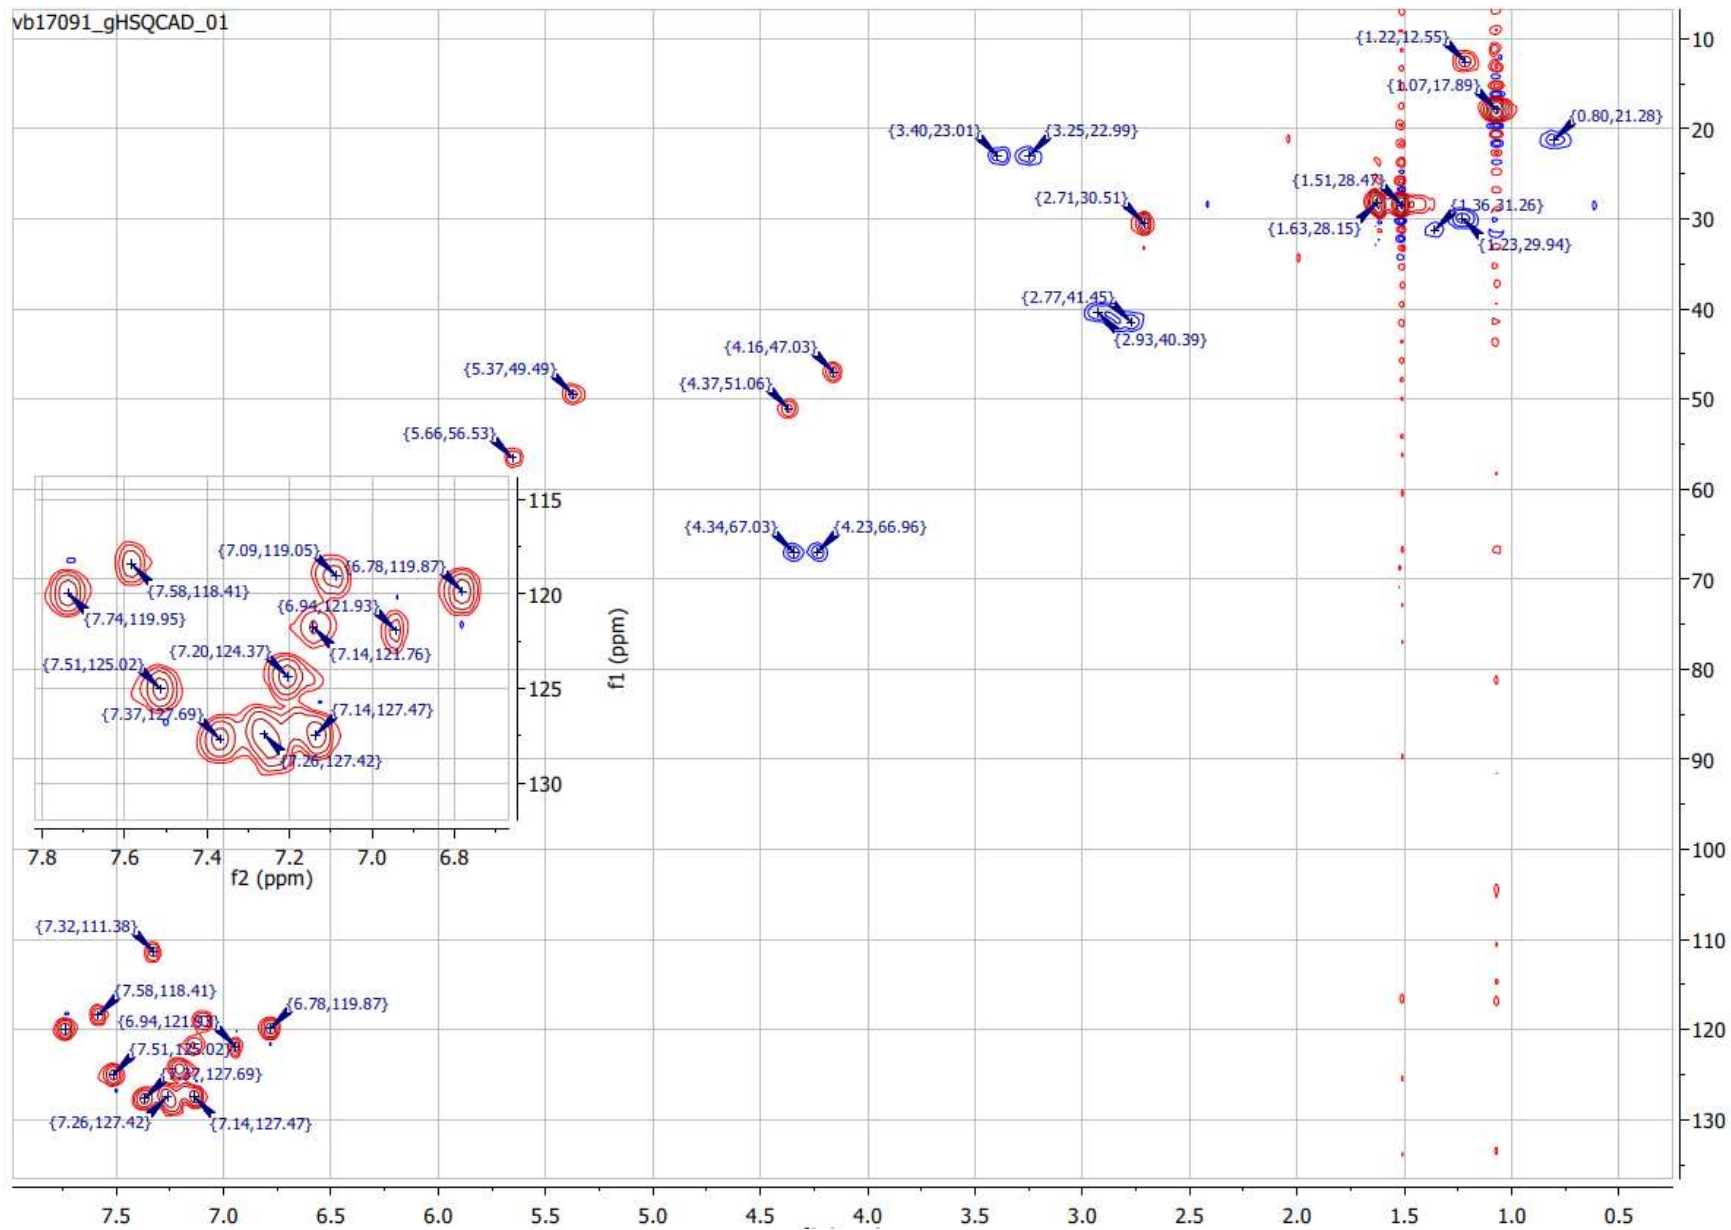

**Figures S8a-e.** NMR spectra of compound **5**-C(CH<sub>3</sub>)<sub>2</sub>C<sub>6</sub>H<sub>5</sub>-H in CDCl<sub>3</sub>: <sup>1</sup>H (600 MHz), <sup>13</sup>C{<sup>1</sup>H} (126 MHz),

APT (CH/CH<sub>3</sub> +, C<sub>q</sub>/CH<sub>2</sub> -), <sup>1</sup>H-<sup>1</sup>H-, and <sup>1</sup>H-<sup>13</sup>C- (HSQC) COSY.

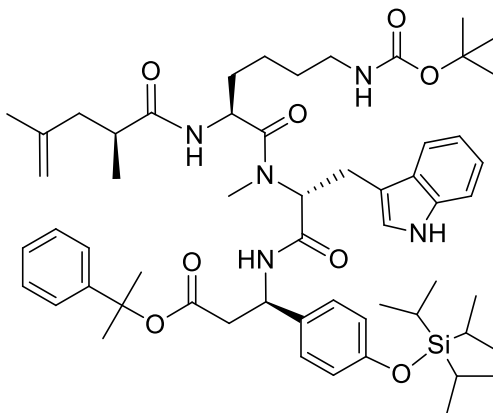

vb17096\_6h.1.fid  
VB17096 cdd3  
Below / MPI10200 / mw

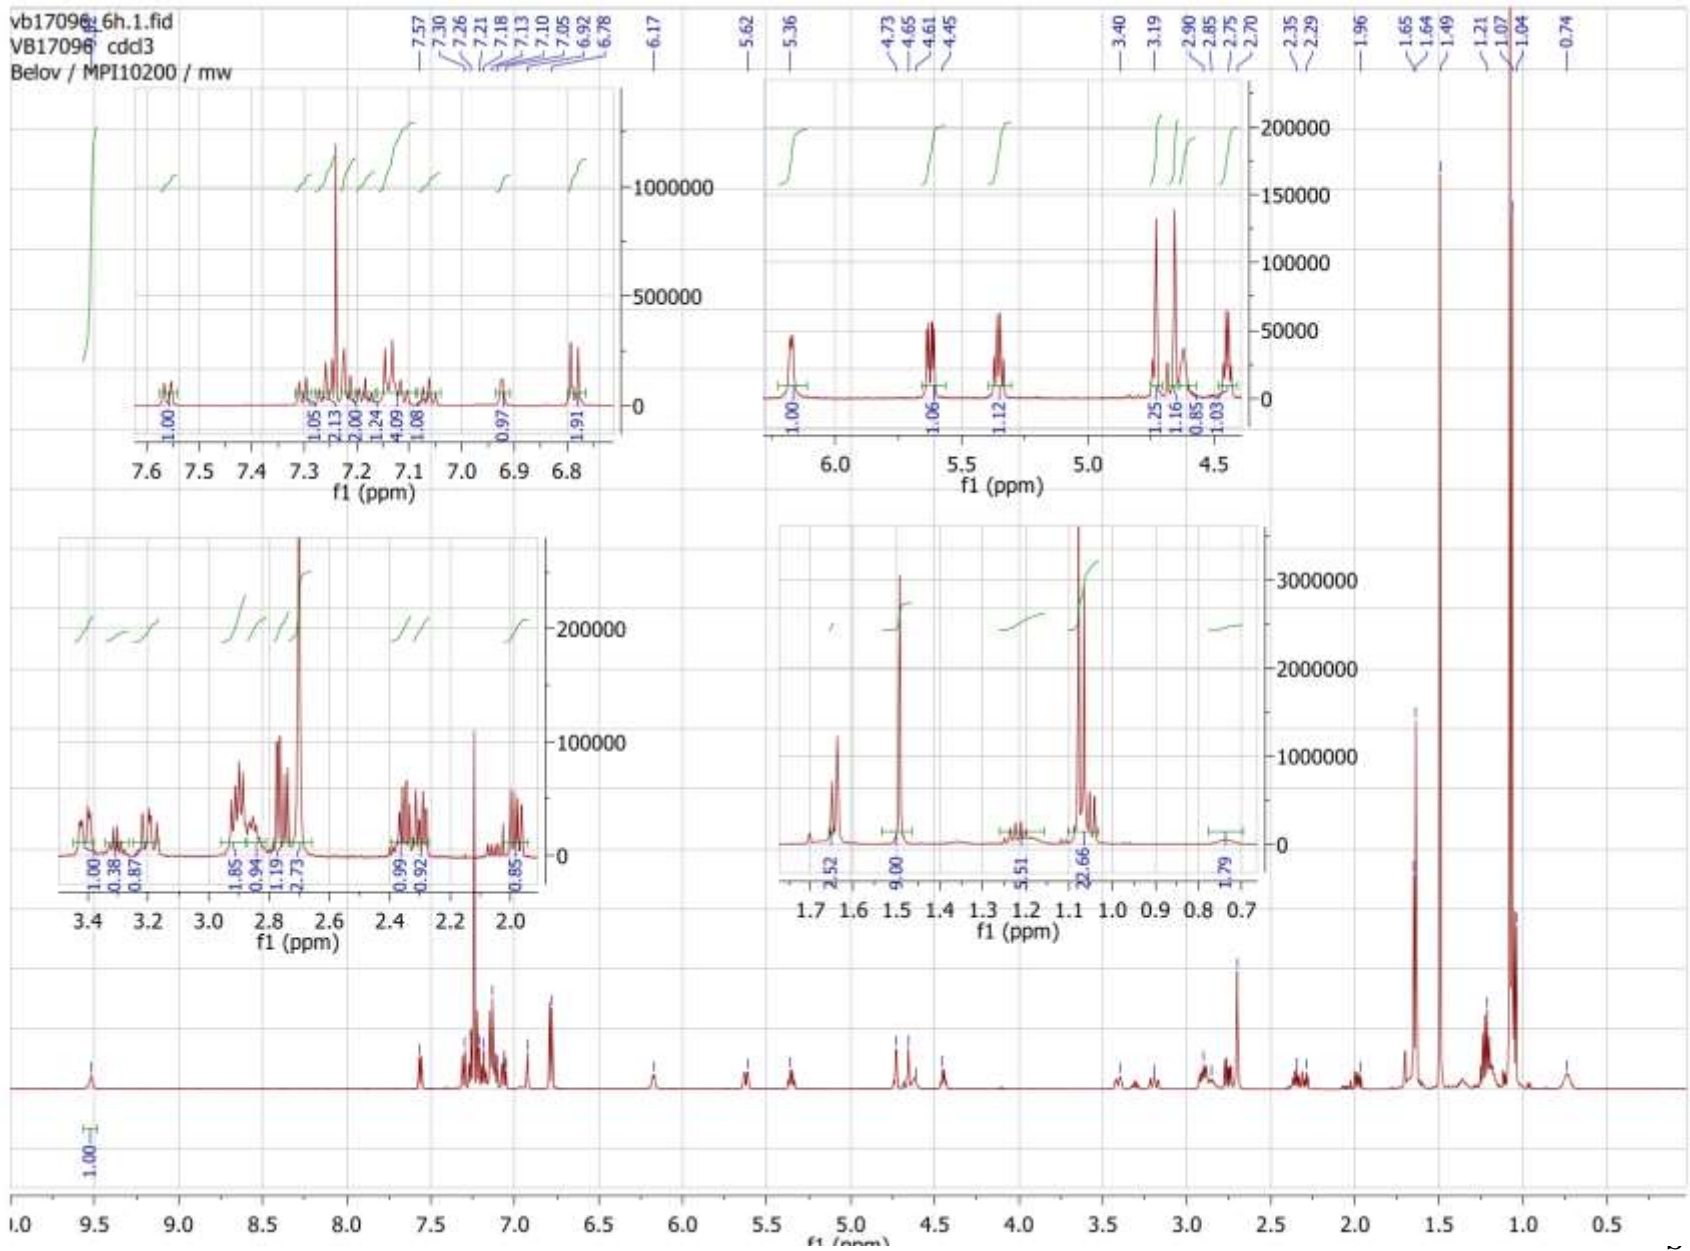

vb17096\_6c.1.fid  
VB17096 cdcl3  
Below / MPI10200 / mw

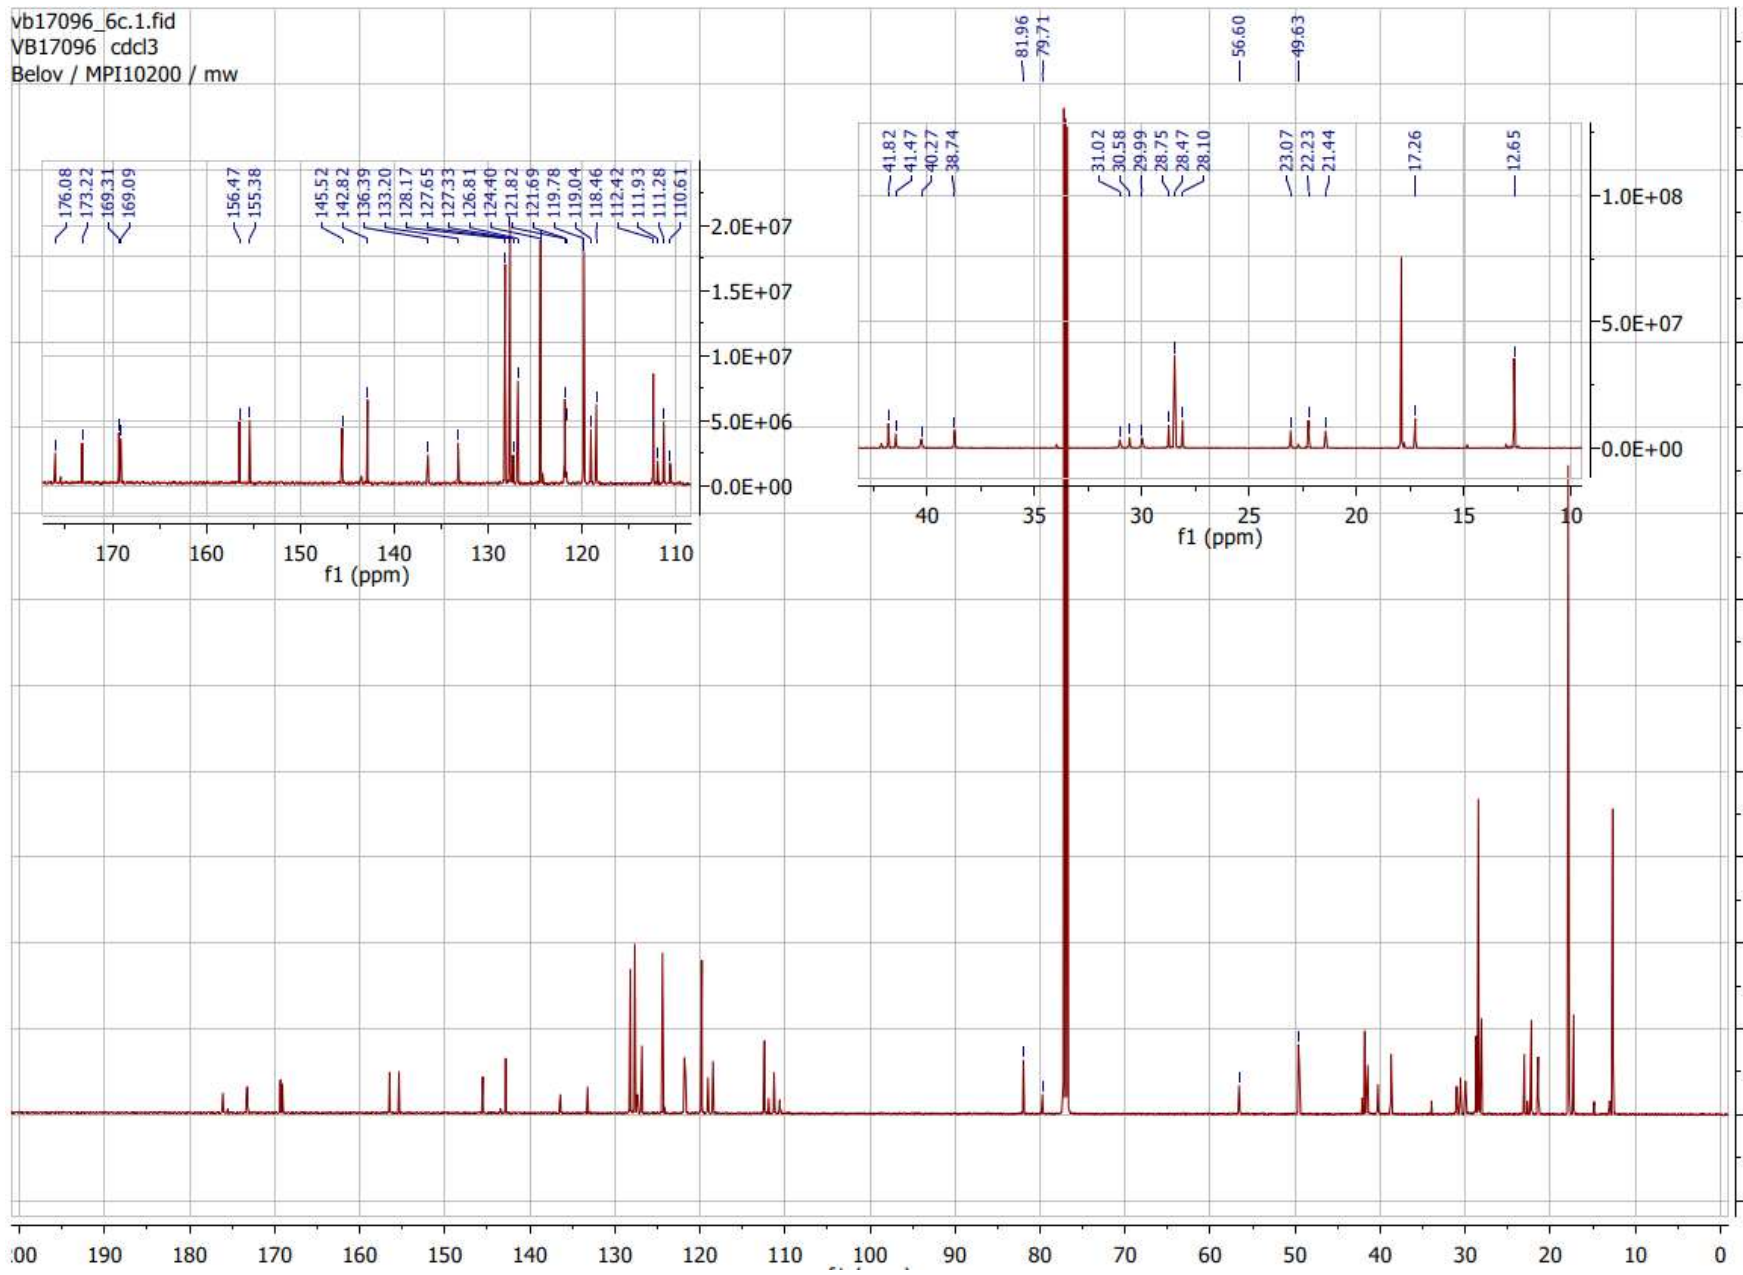



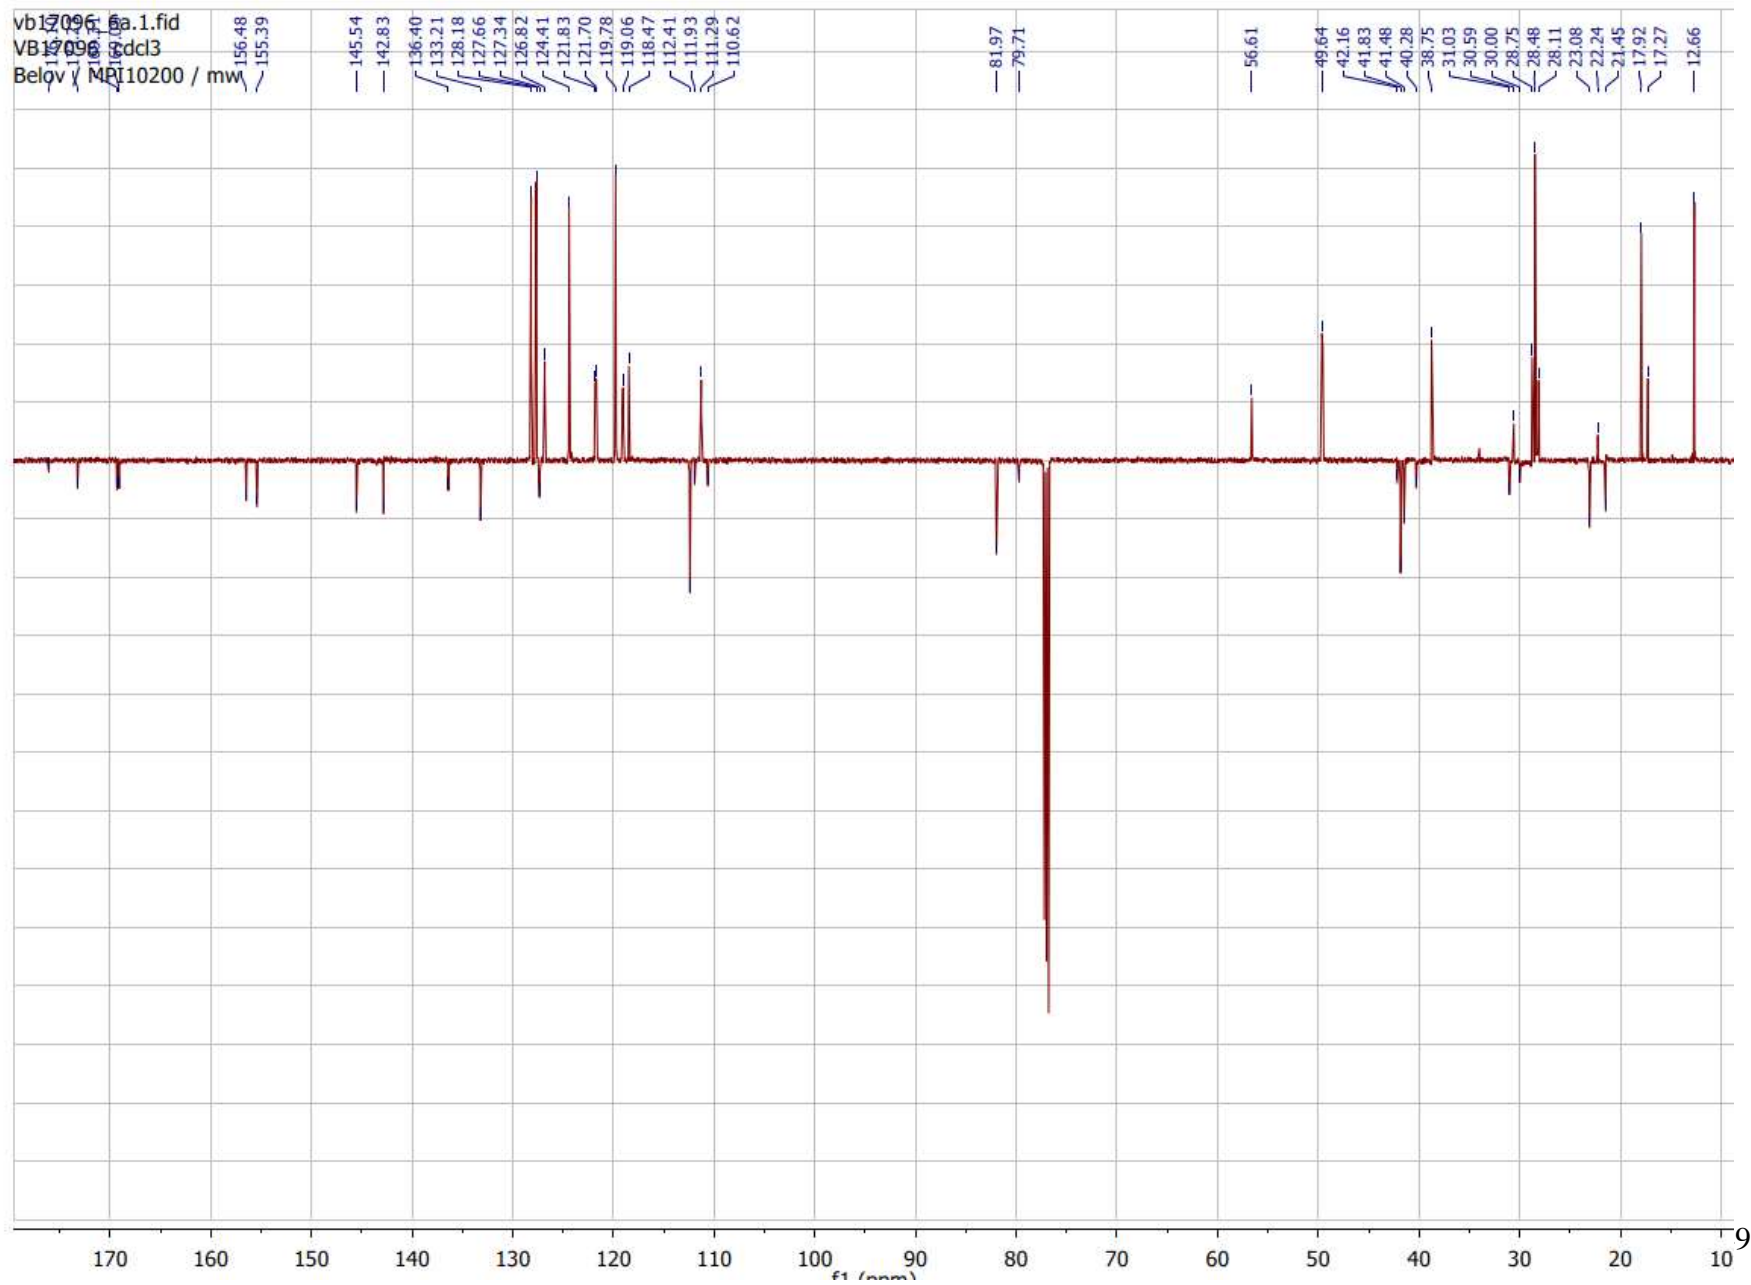

vb17096\_6h-cosy.1.ser  
VB17096 cdcl3  
Belov / MPI10200 / mw

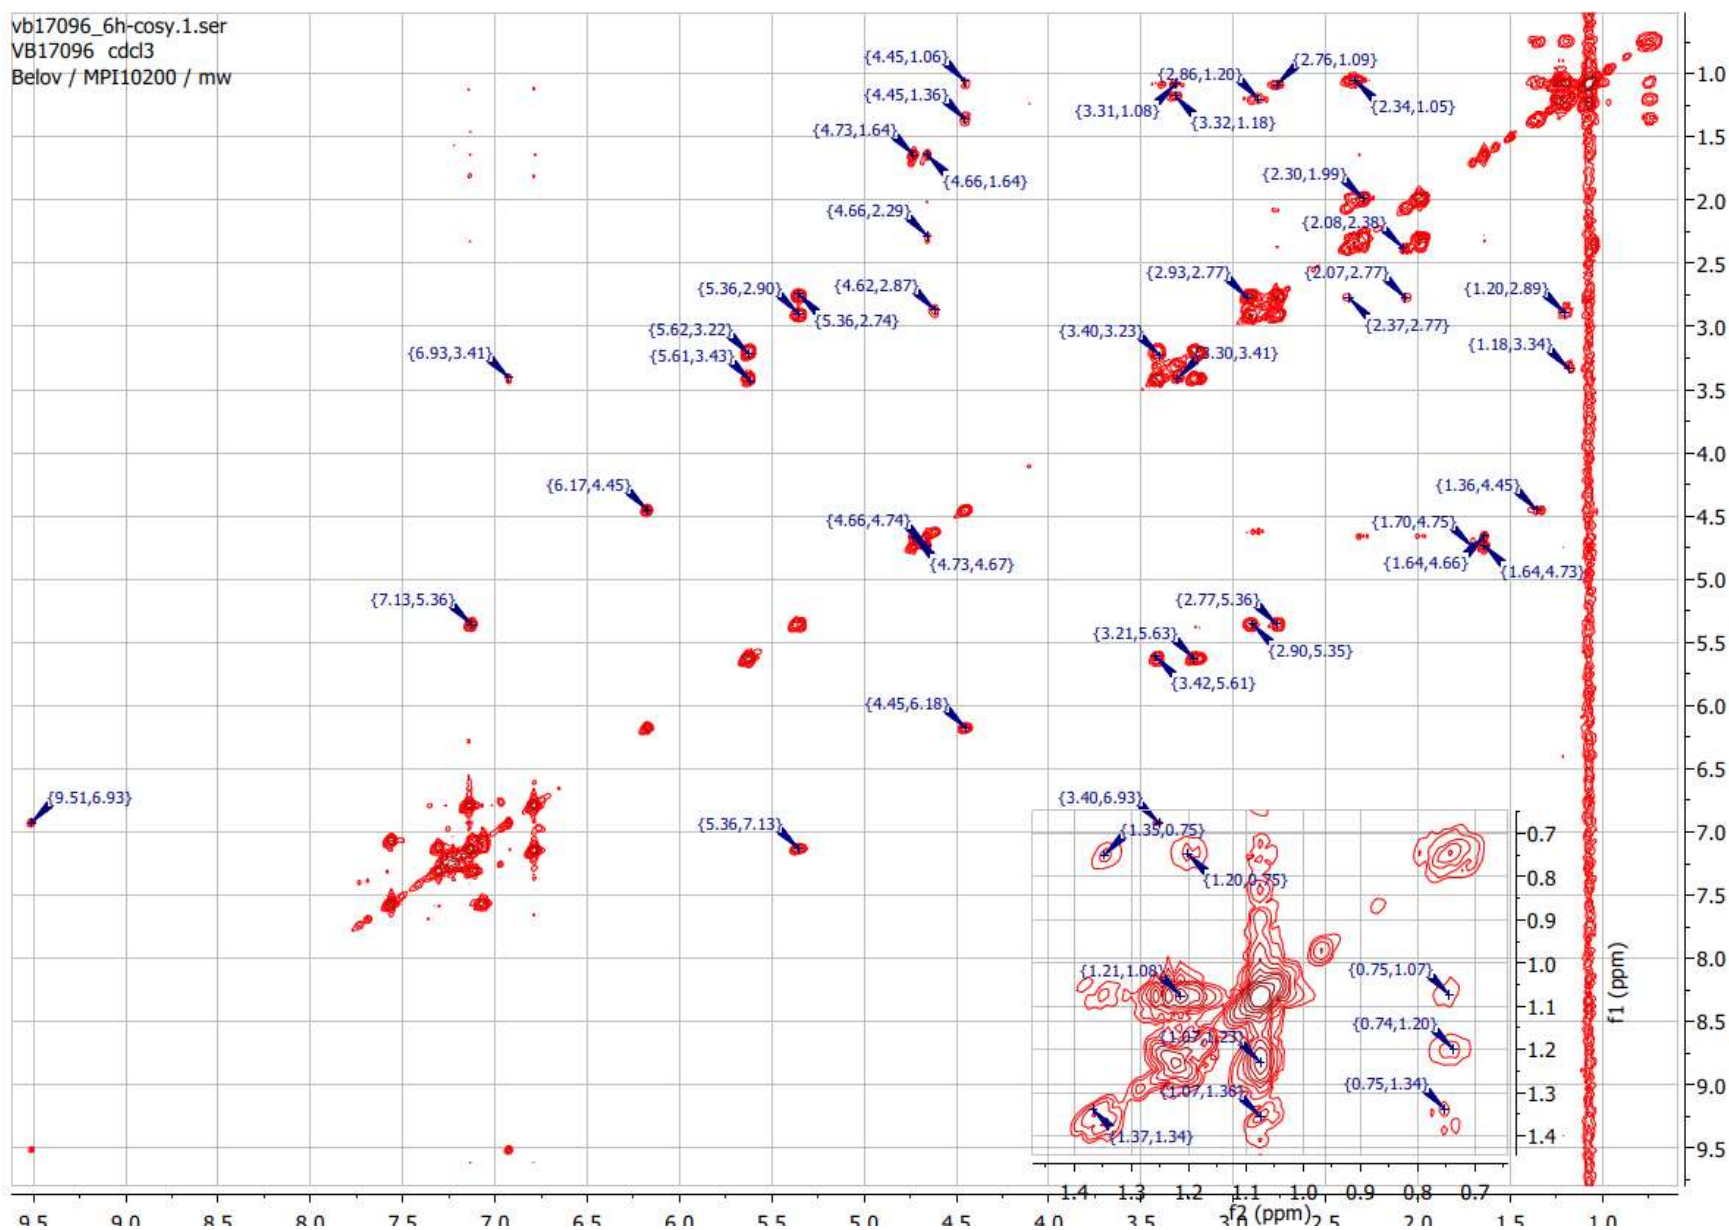

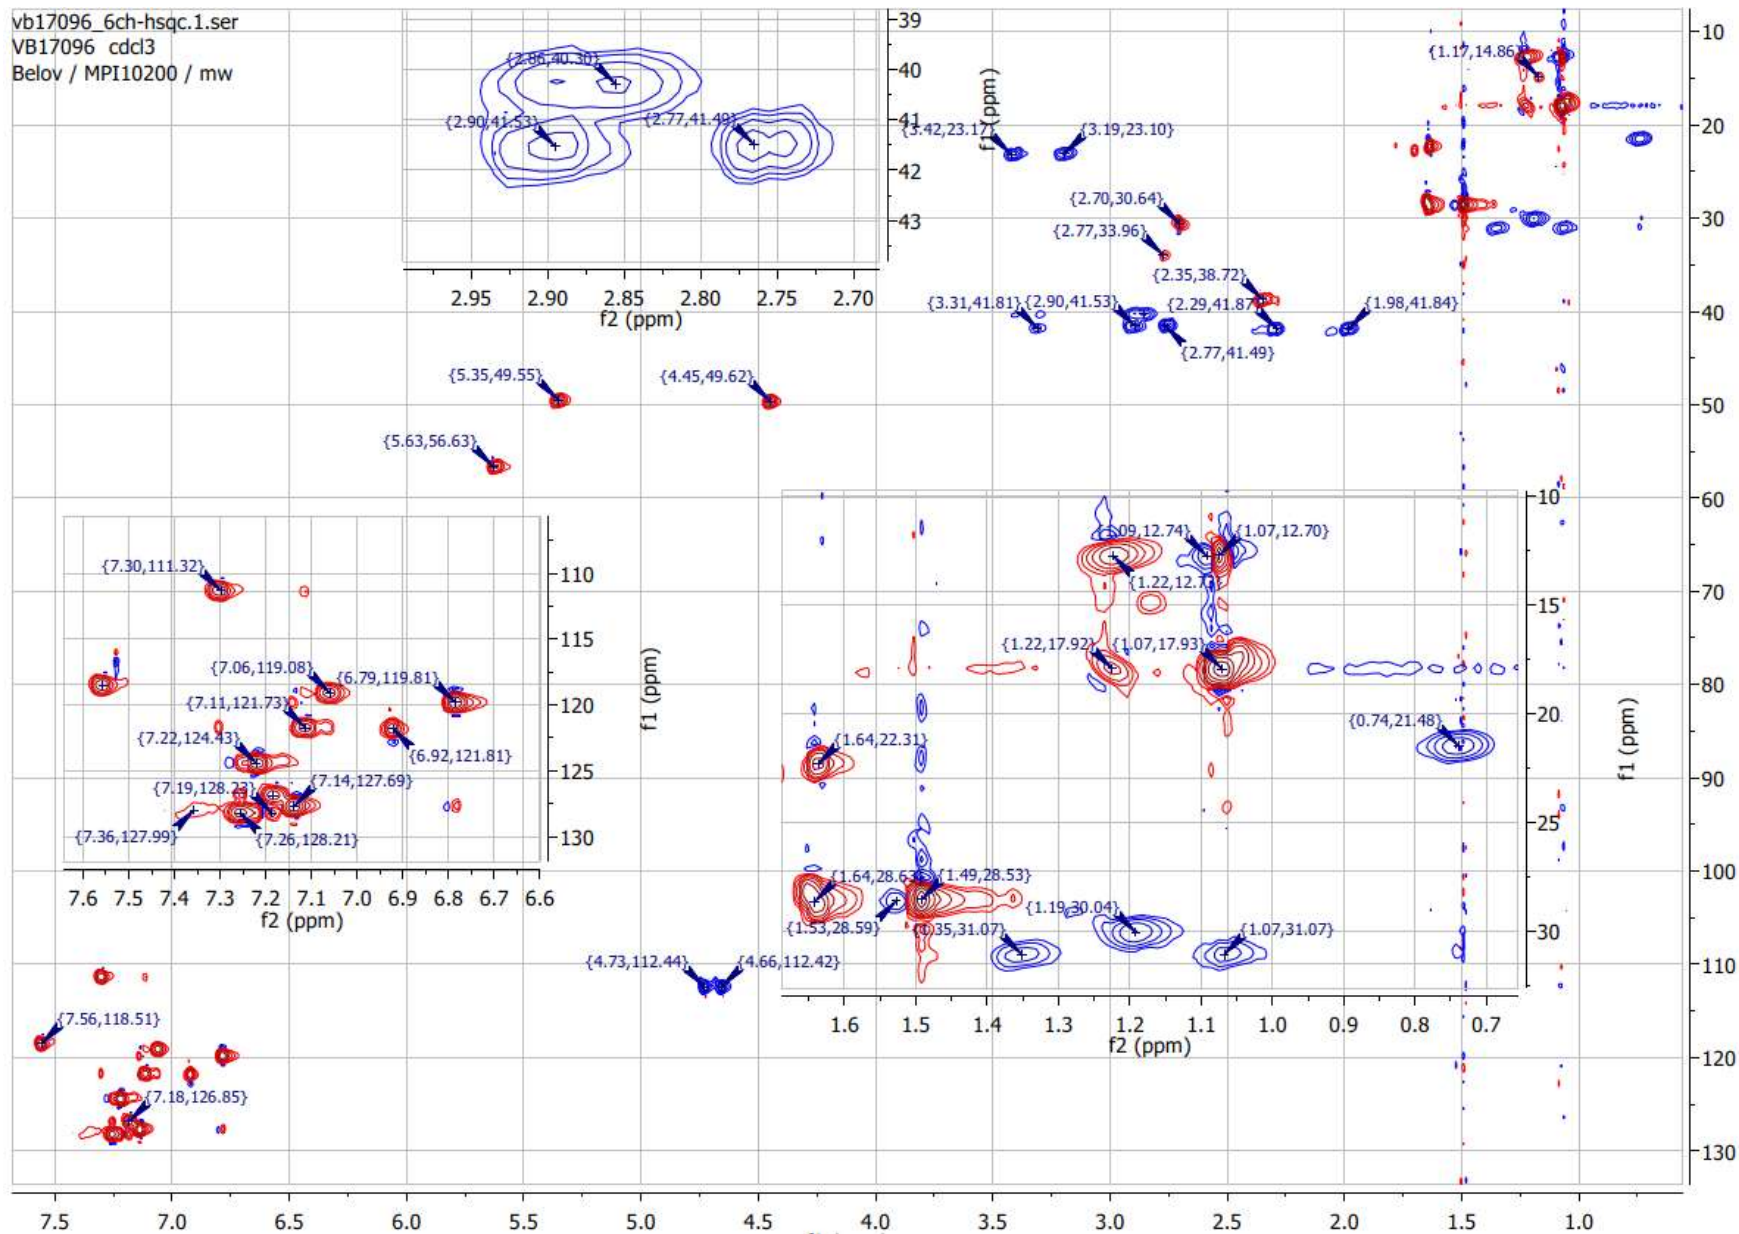

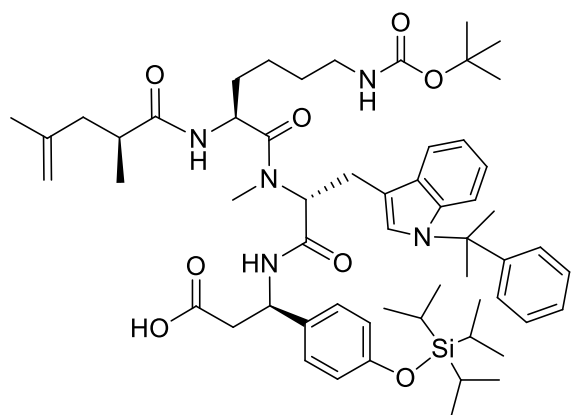

**Figures S9a-e.** NMR spectra of compound **5**-H-C(CH<sub>3</sub>)<sub>2</sub>C<sub>6</sub>H<sub>5</sub> in CDCl<sub>3</sub>: <sup>1</sup>H (600 MHz), <sup>13</sup>C{<sup>1</sup>H} (126 MHz), APT CH/CH<sub>3</sub>+, C<sub>q</sub>/CH<sub>2</sub> -),

<sup>1</sup>H-<sup>1</sup>H-, and <sup>1</sup>H-<sup>13</sup>C- (HSQC) COSY.

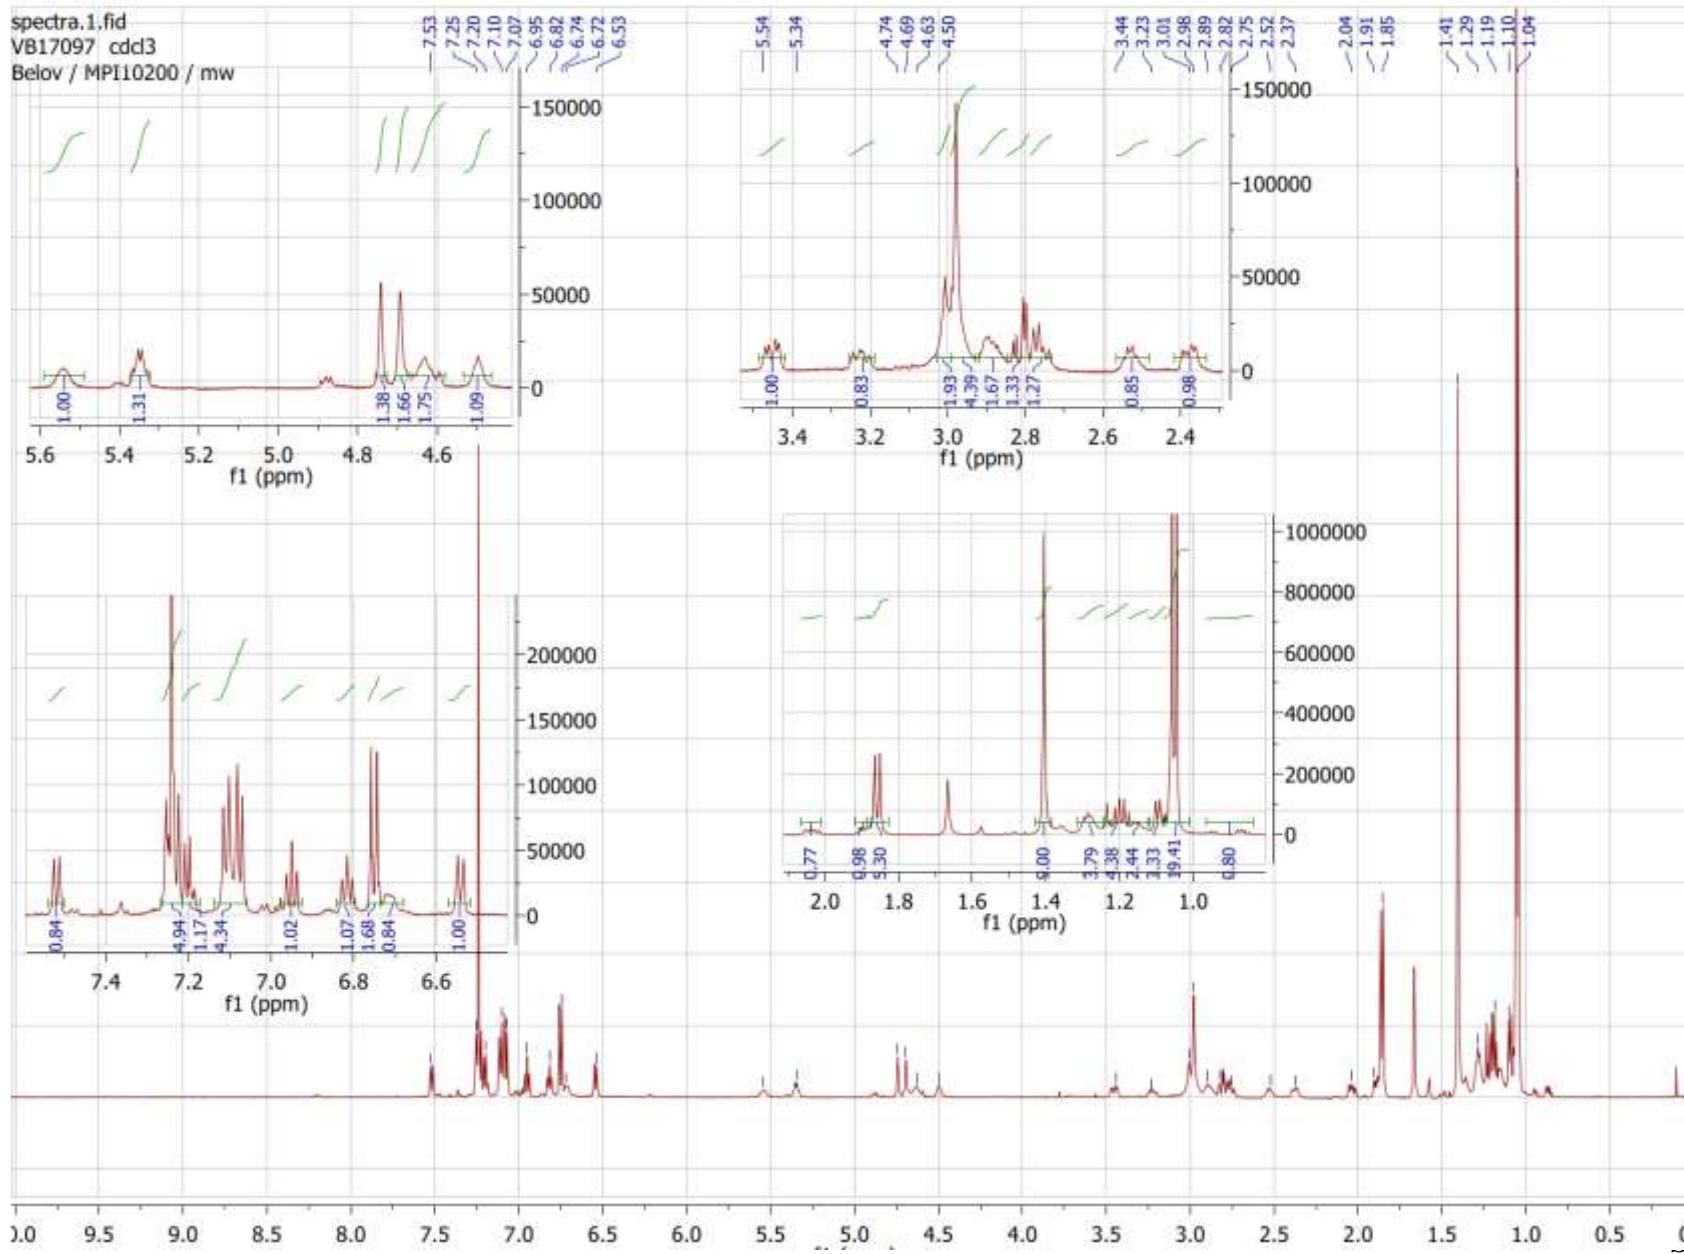

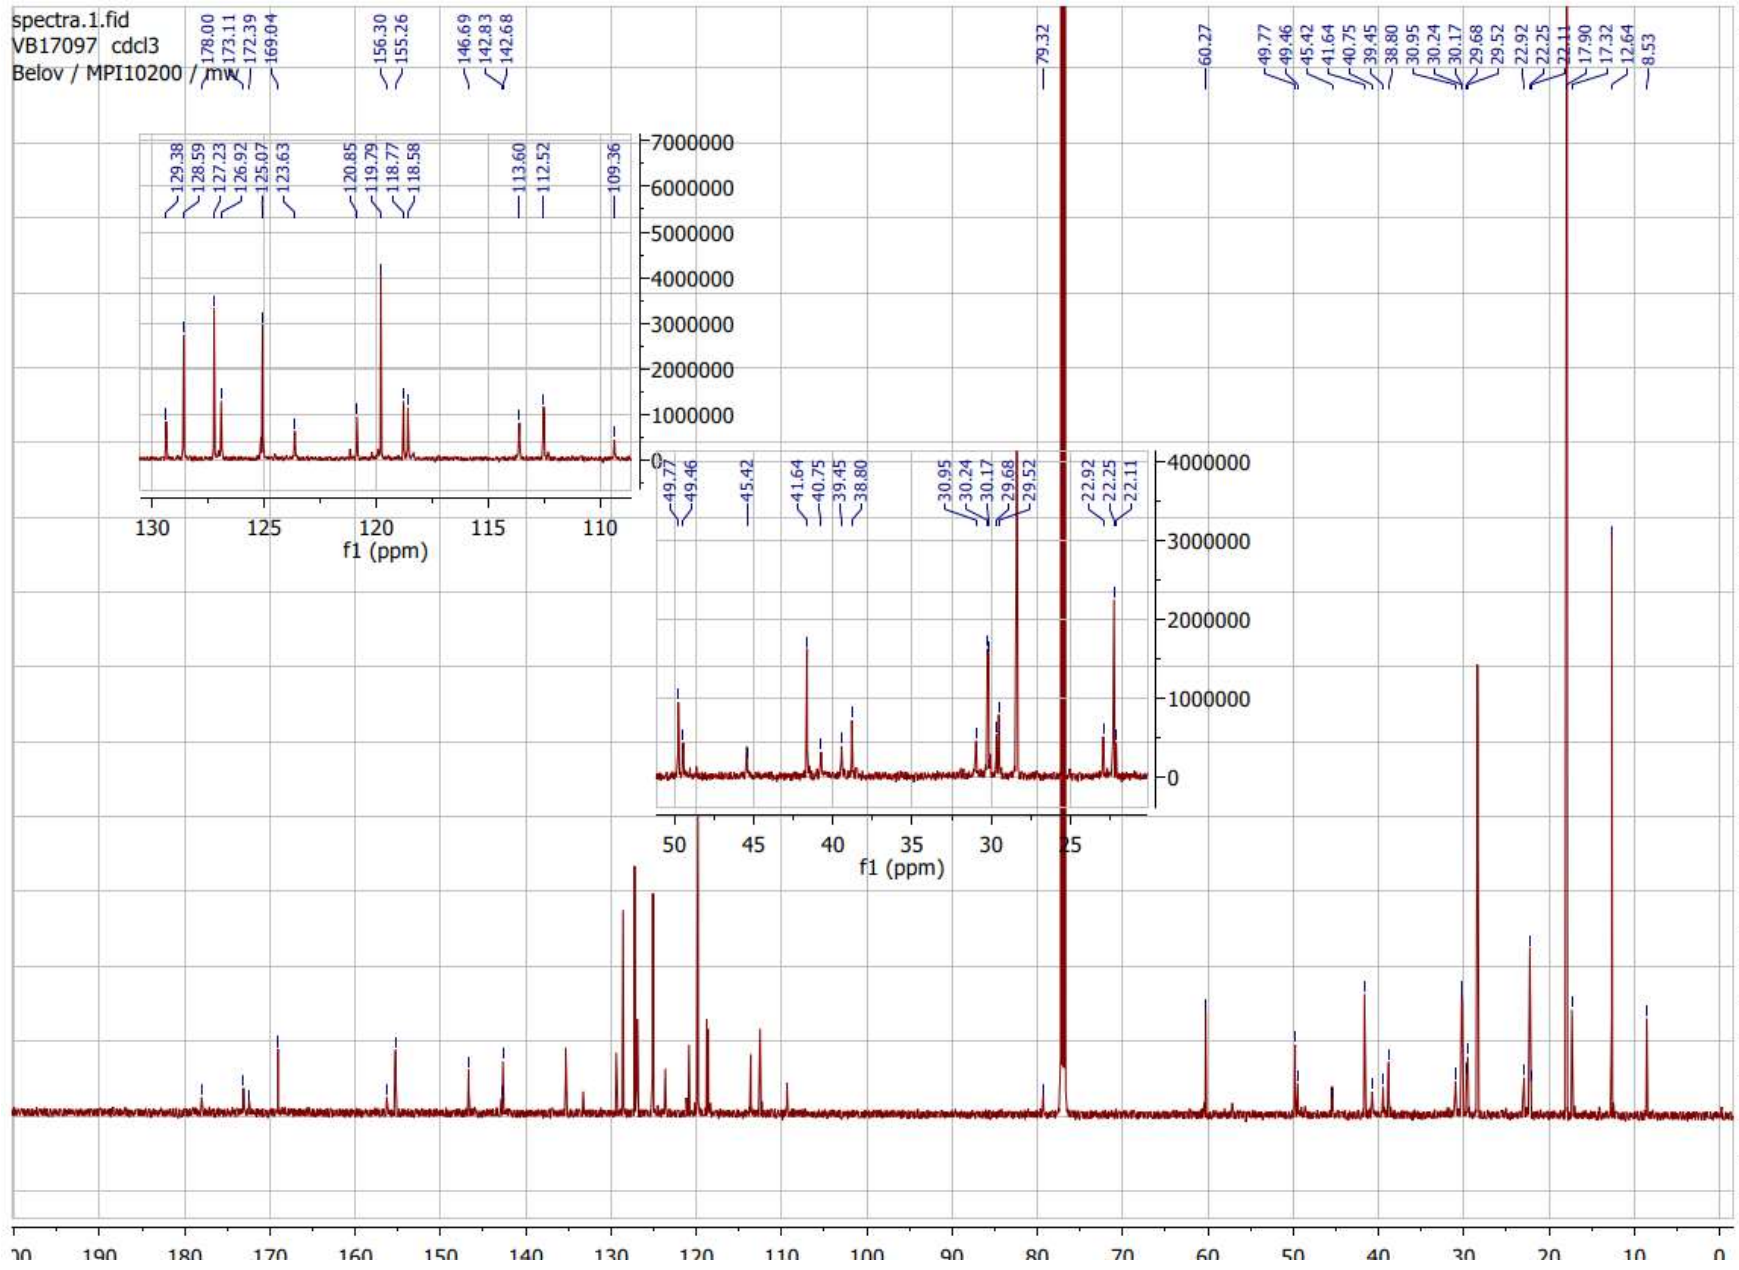

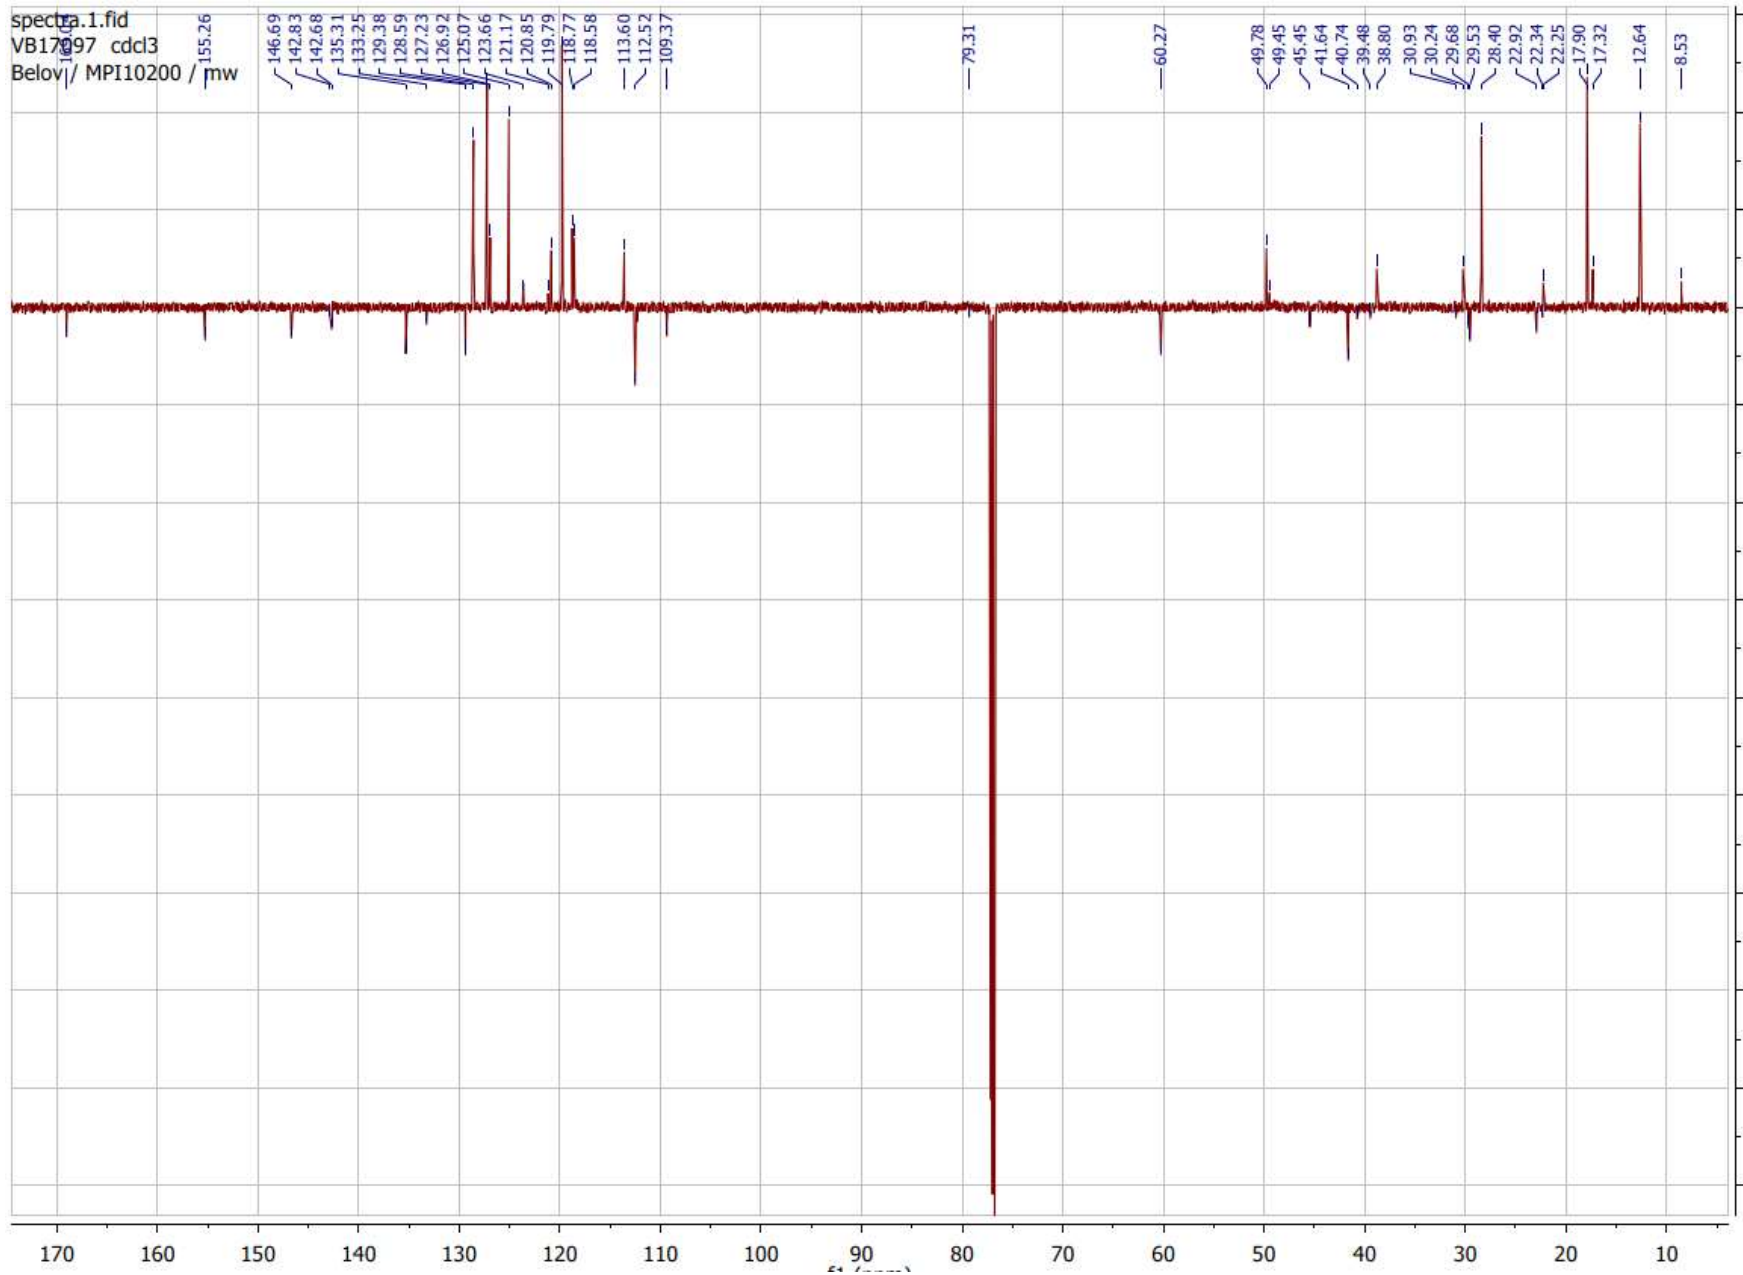

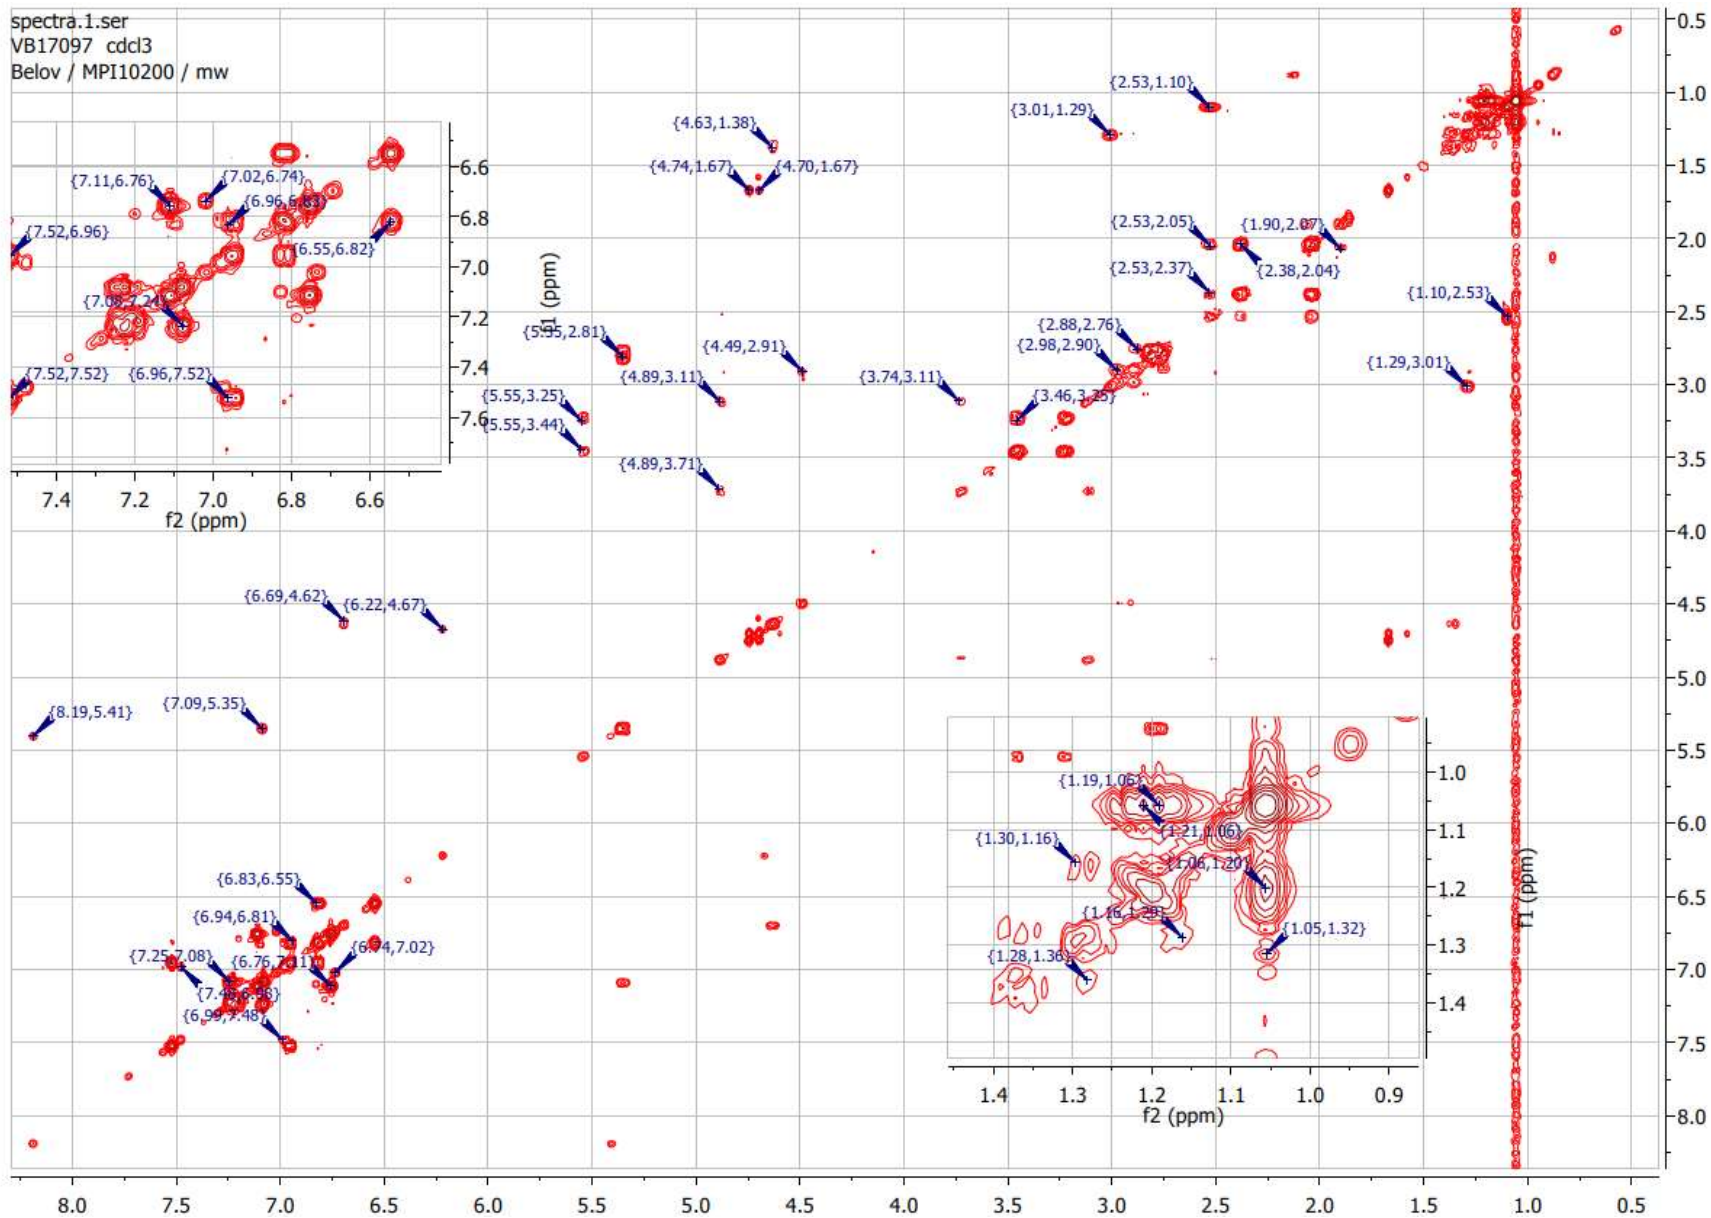



spectra.1.ser  
VB17097 cdcl3  
Below / MPI10200 / mw

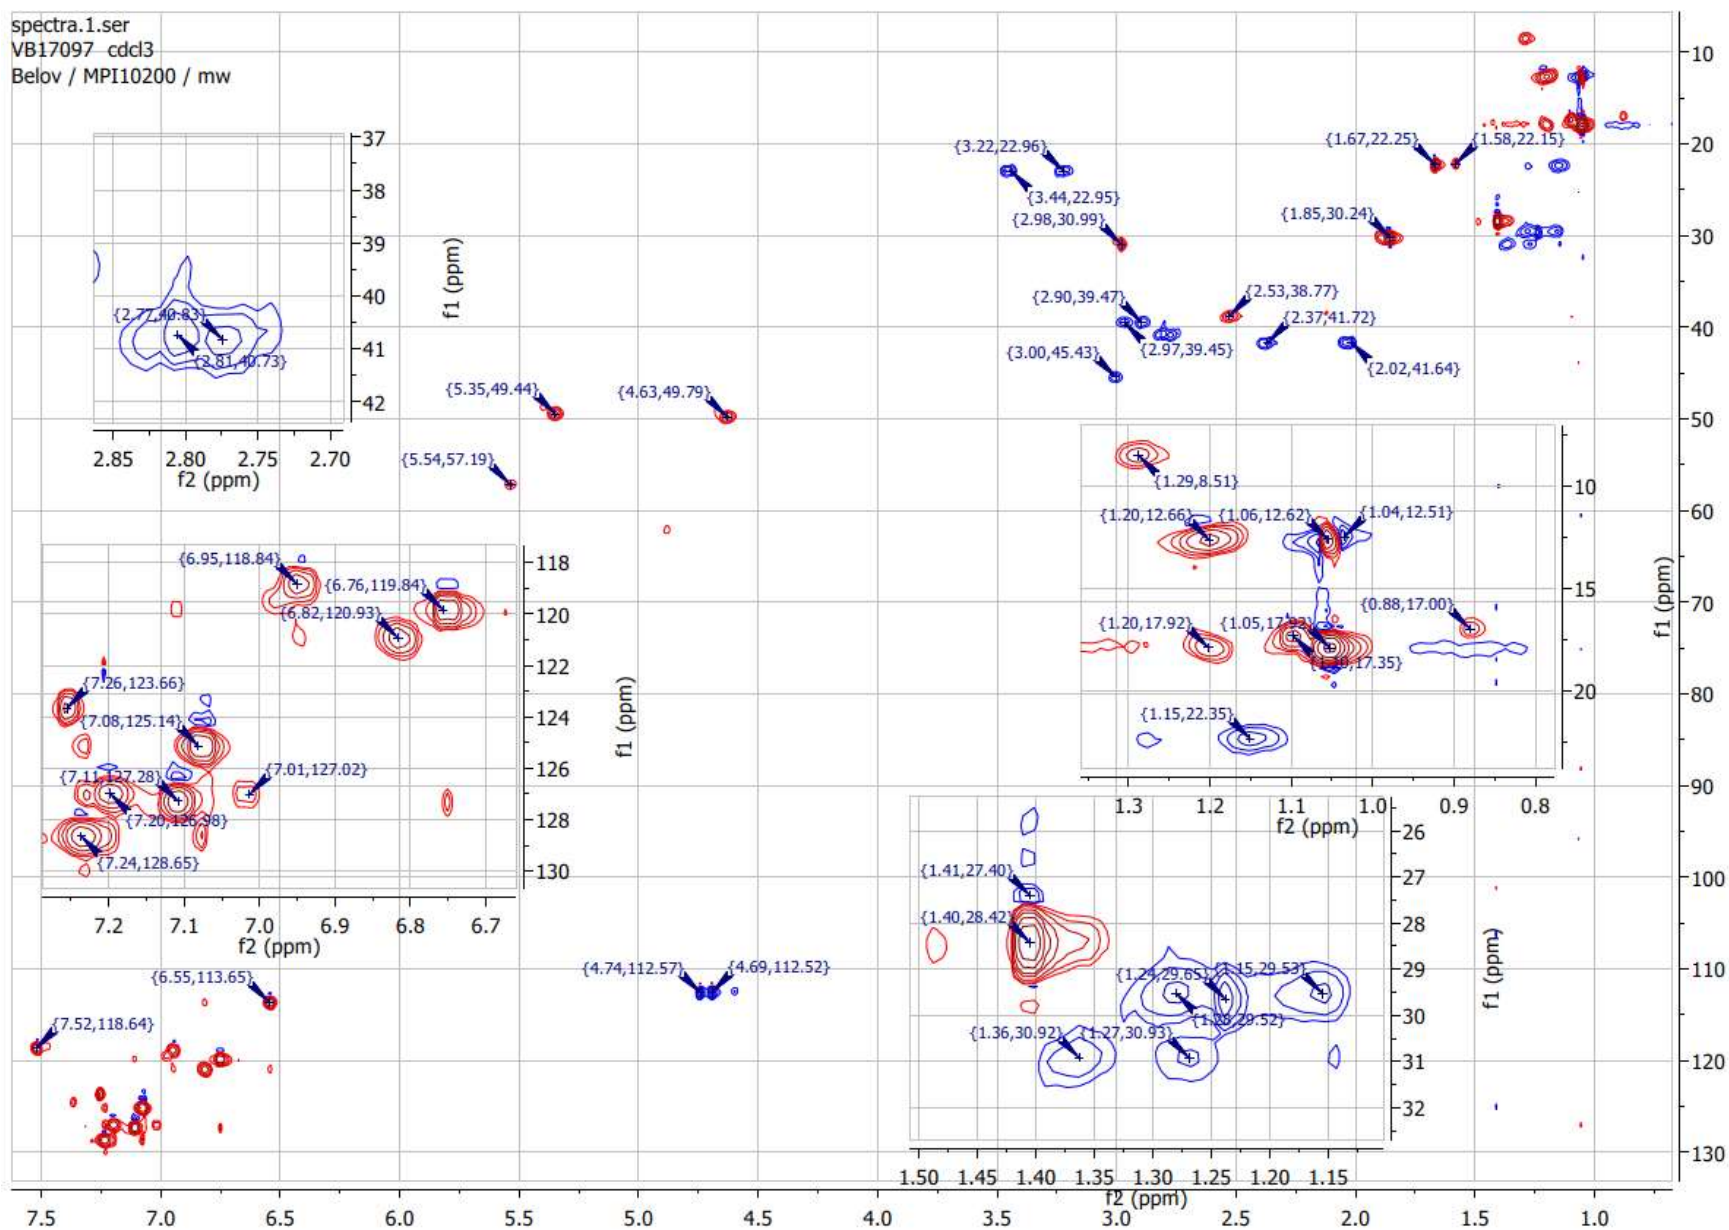

**Figures S10a-d.** NMR spectra of compound **6** in CD<sub>2</sub>Cl<sub>2</sub>: <sup>1</sup>H (500 MHz), <sup>13</sup>C{<sup>1</sup>H} (126 MHz), <sup>1</sup>H-<sup>1</sup>H, and <sup>1</sup>H-<sup>13</sup>C COSY.

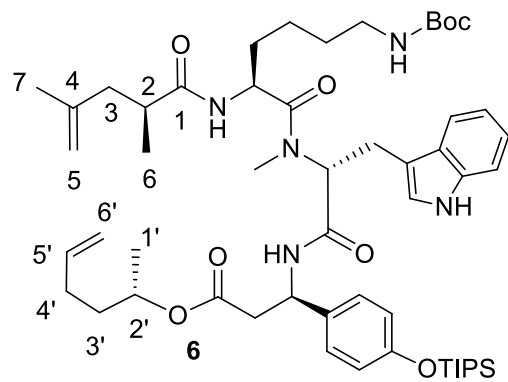

cf278\_11\_5h.1.fid  
1H: CF278-11 cd2d2  
Seikowski / MPI 10200 / rs

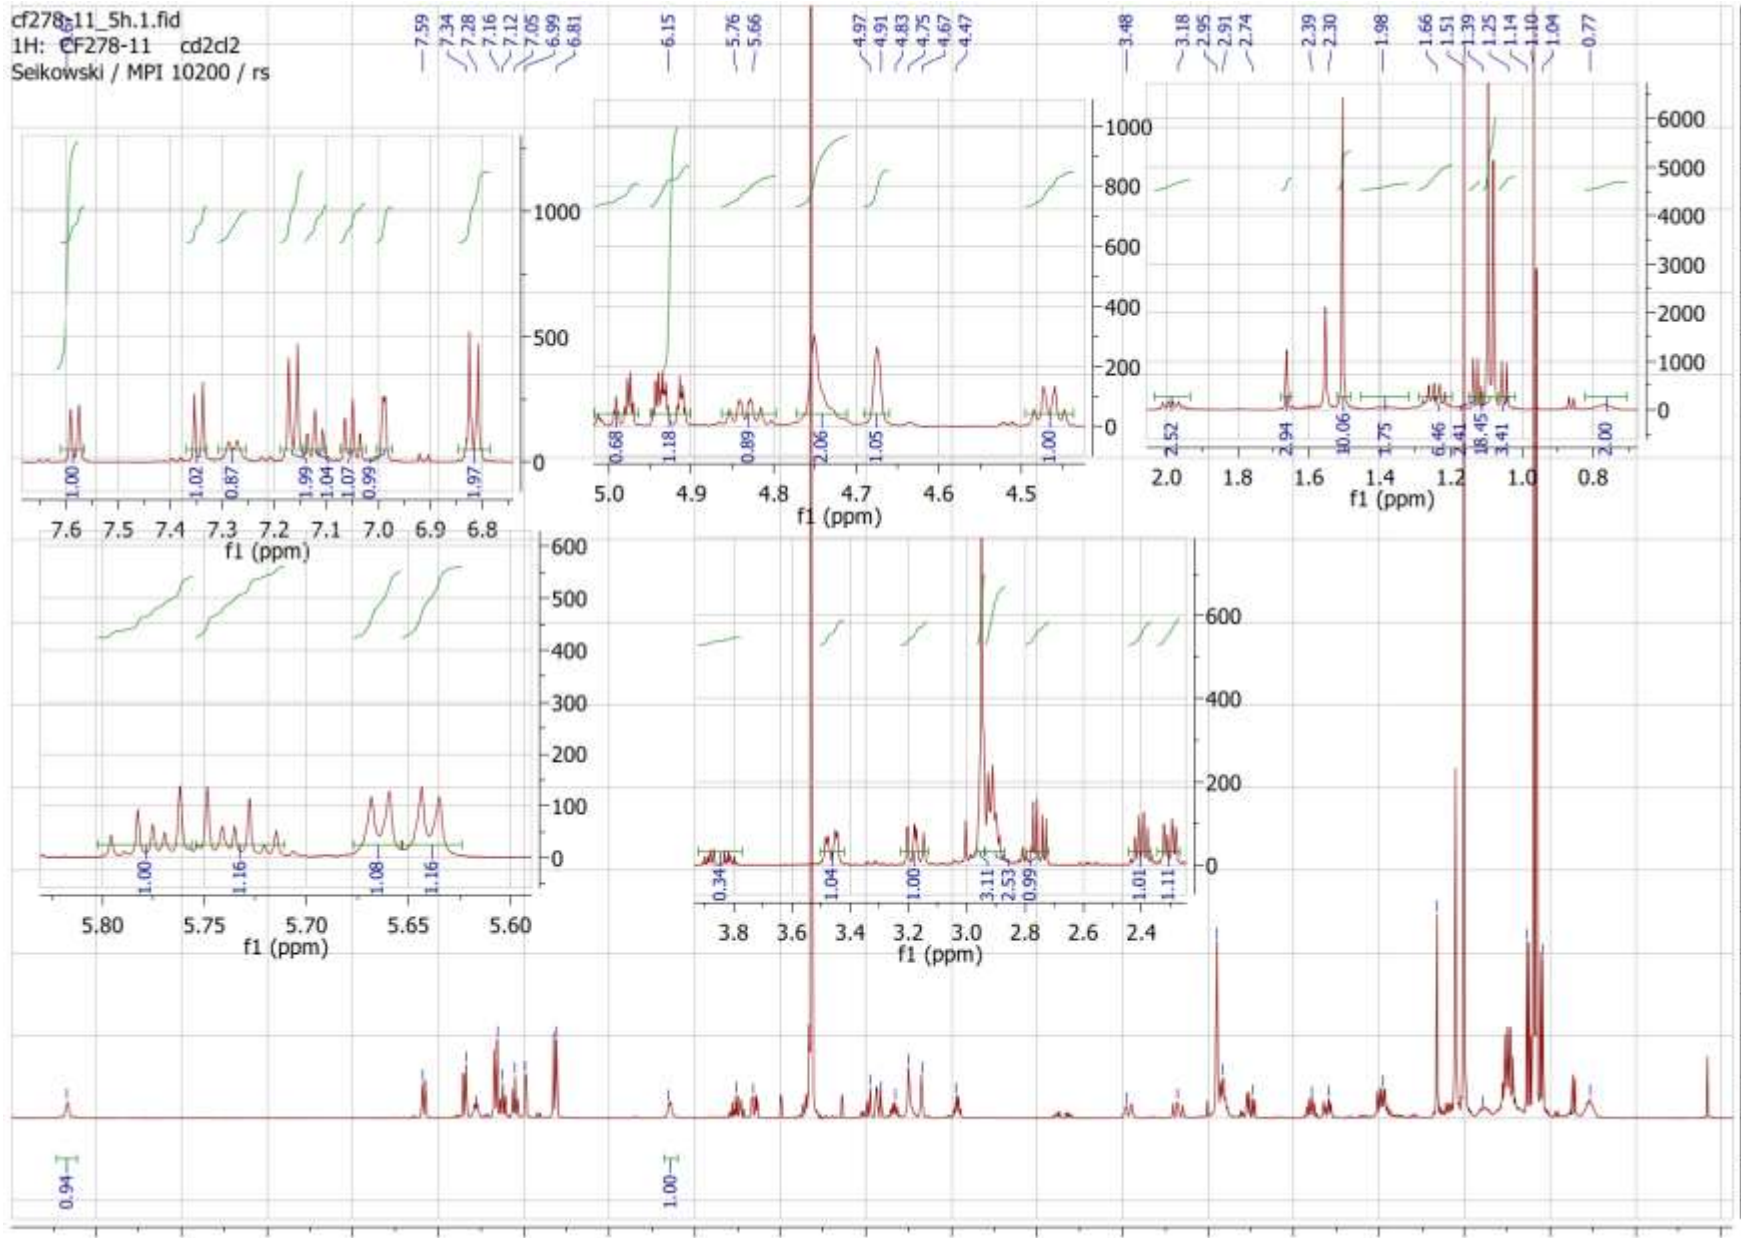

cf278-11\_5c.1.fid  
CF278-11 cd2c2  
Below / 10200 MPI

176.58  
173.43  
170.70  
169.28

156.85  
155.63

143.40

138.26  
136.79  
133.97

127.83  
127.59

122.37  
121.83

119.97  
119.10  
118.72

114.77  
112.39  
111.60  
111.04

79.77

70.88

56.95

50.05  
49.68

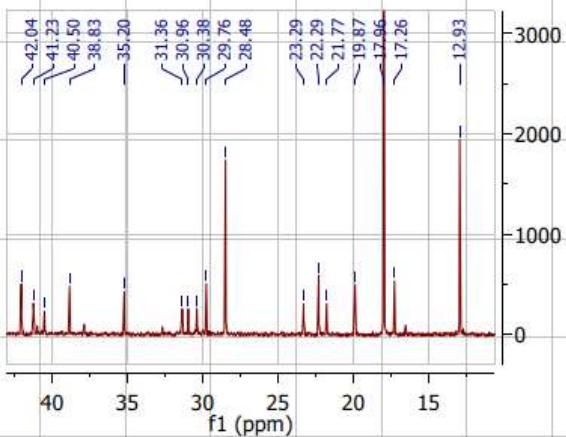

10 190 180 170 160 150 140 130 120 110 100 90 80 70 60 50 40 30 20 10 0 (0)

f1 (ppm)

cf278-11\_5cosy.1.ser  
CF278-11 cd2cl2  
Below / MPI 10200 / CS

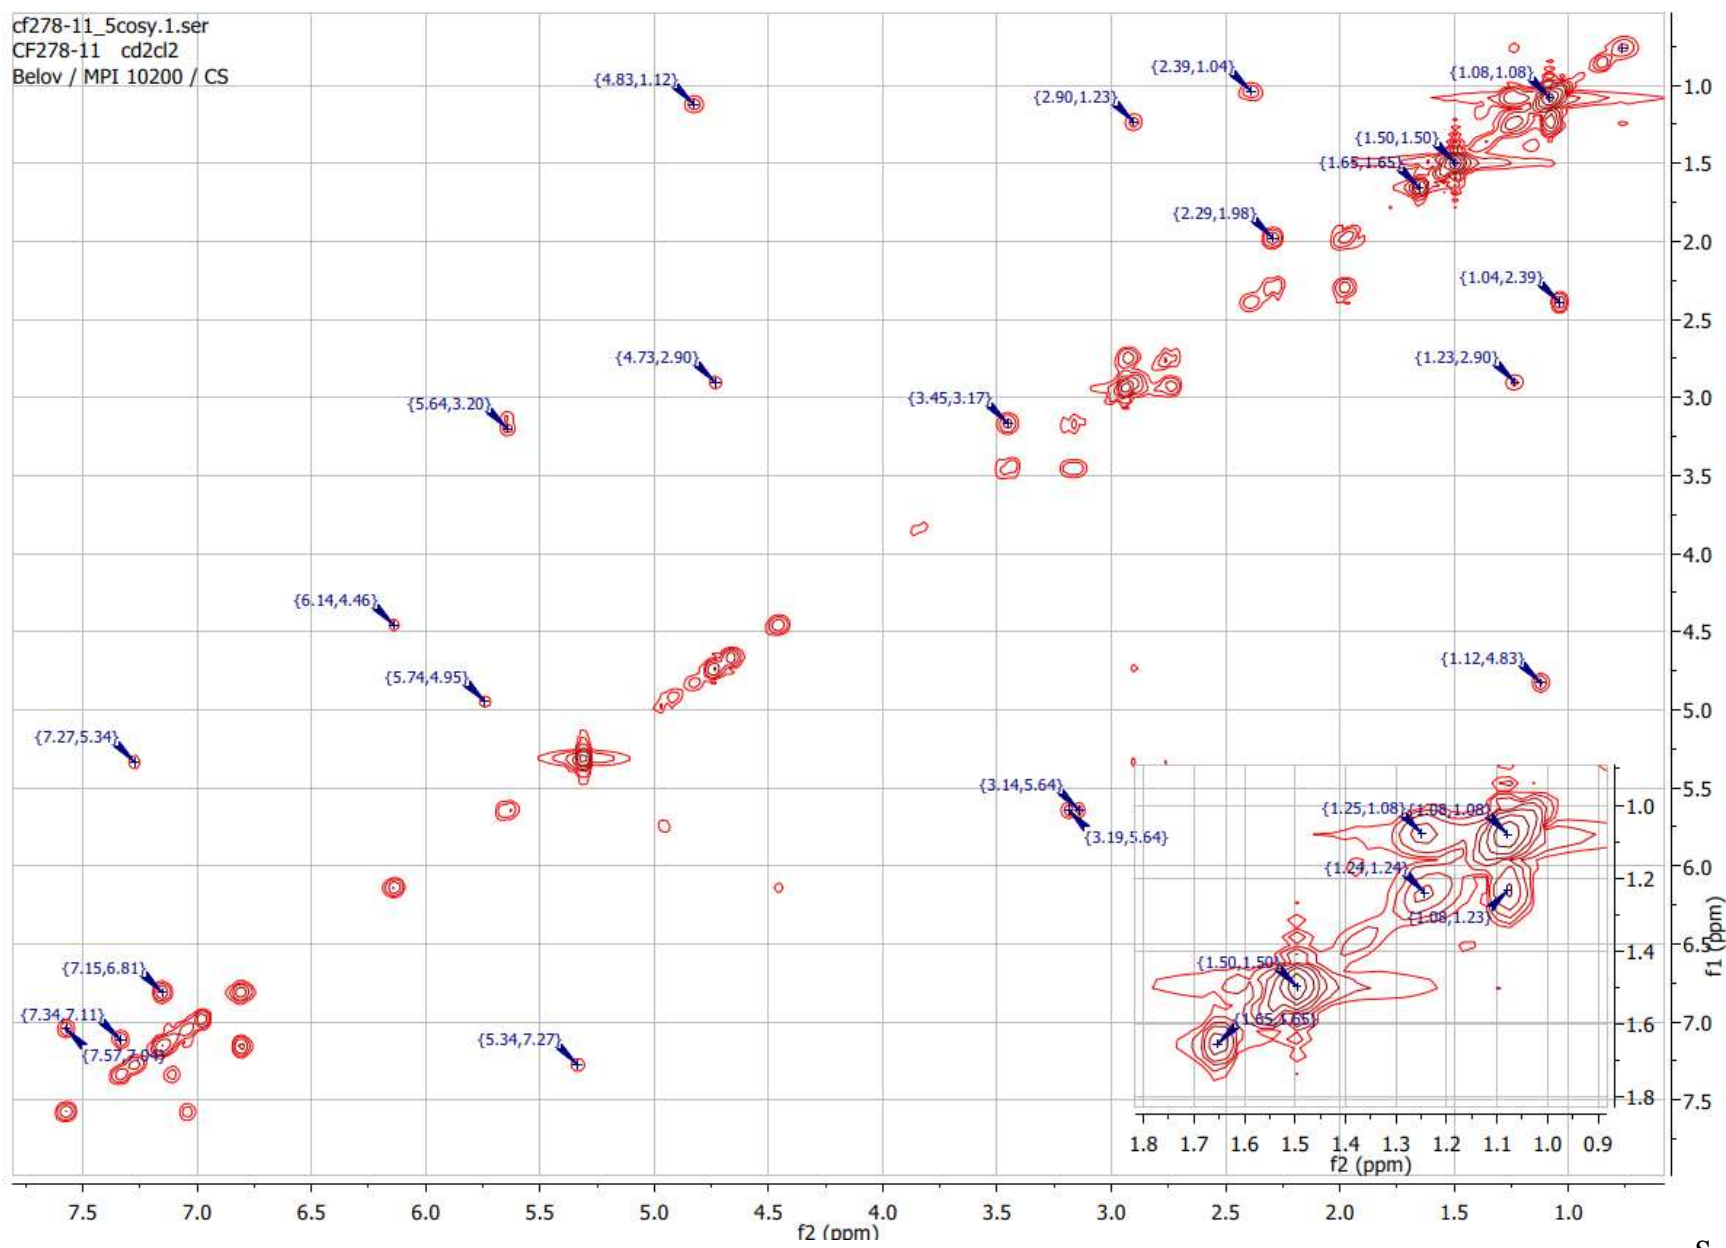

cf278-11\_5hsqc.1.ser  
CF278-11 cd2cd2  
Below / MPI 10200 / CS

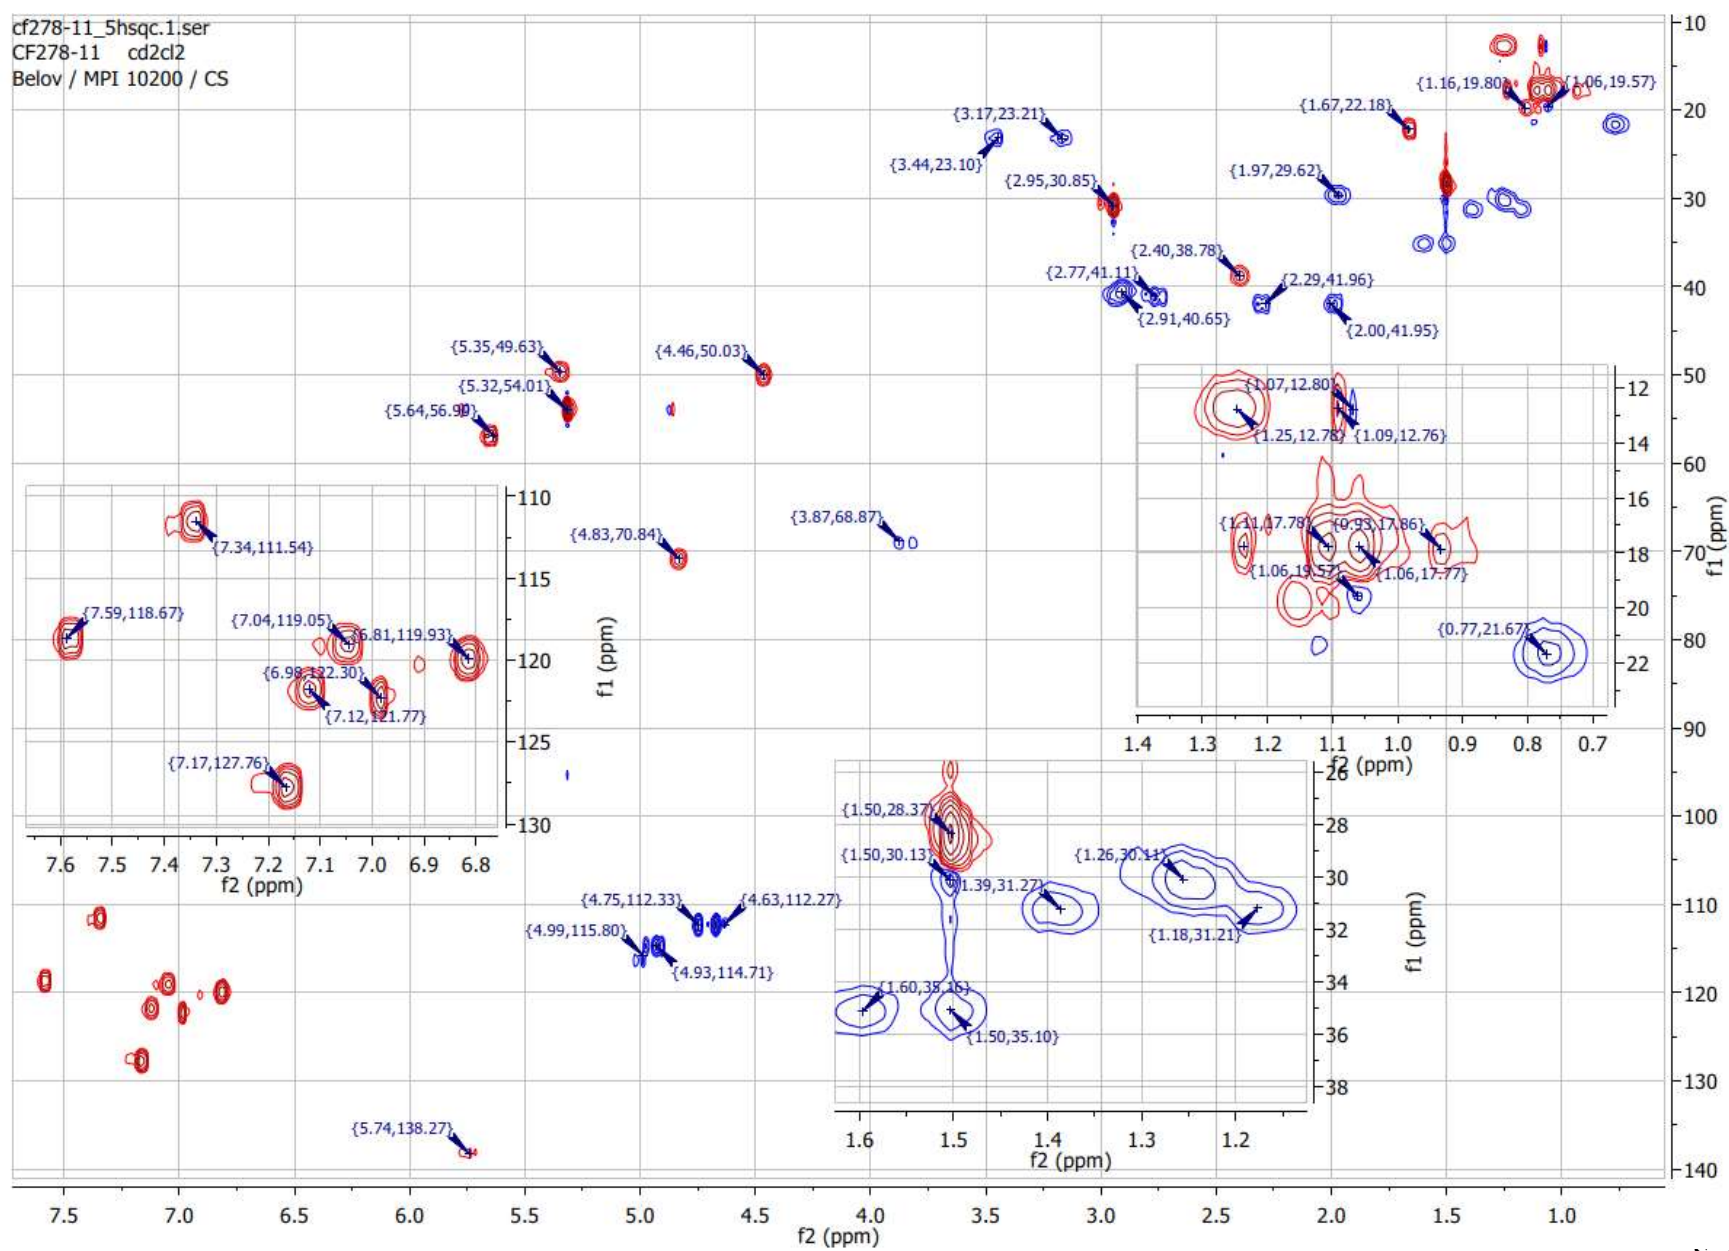

**Figures S11a-e.** NMR spectra of compound 7-TIPS in CDCl<sub>3</sub>: <sup>1</sup>H (400 MHz), <sup>13</sup>C{<sup>1</sup>H} (101 MHz), DEPT, <sup>1</sup>H-<sup>1</sup>H, and <sup>1</sup>H-<sup>13</sup>C (HSQC)

COSY.

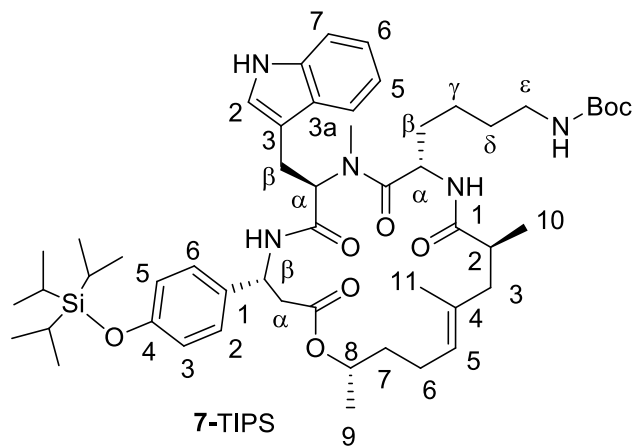

cf-278-12-ansatz3-fr20-27\_PROTON\_01

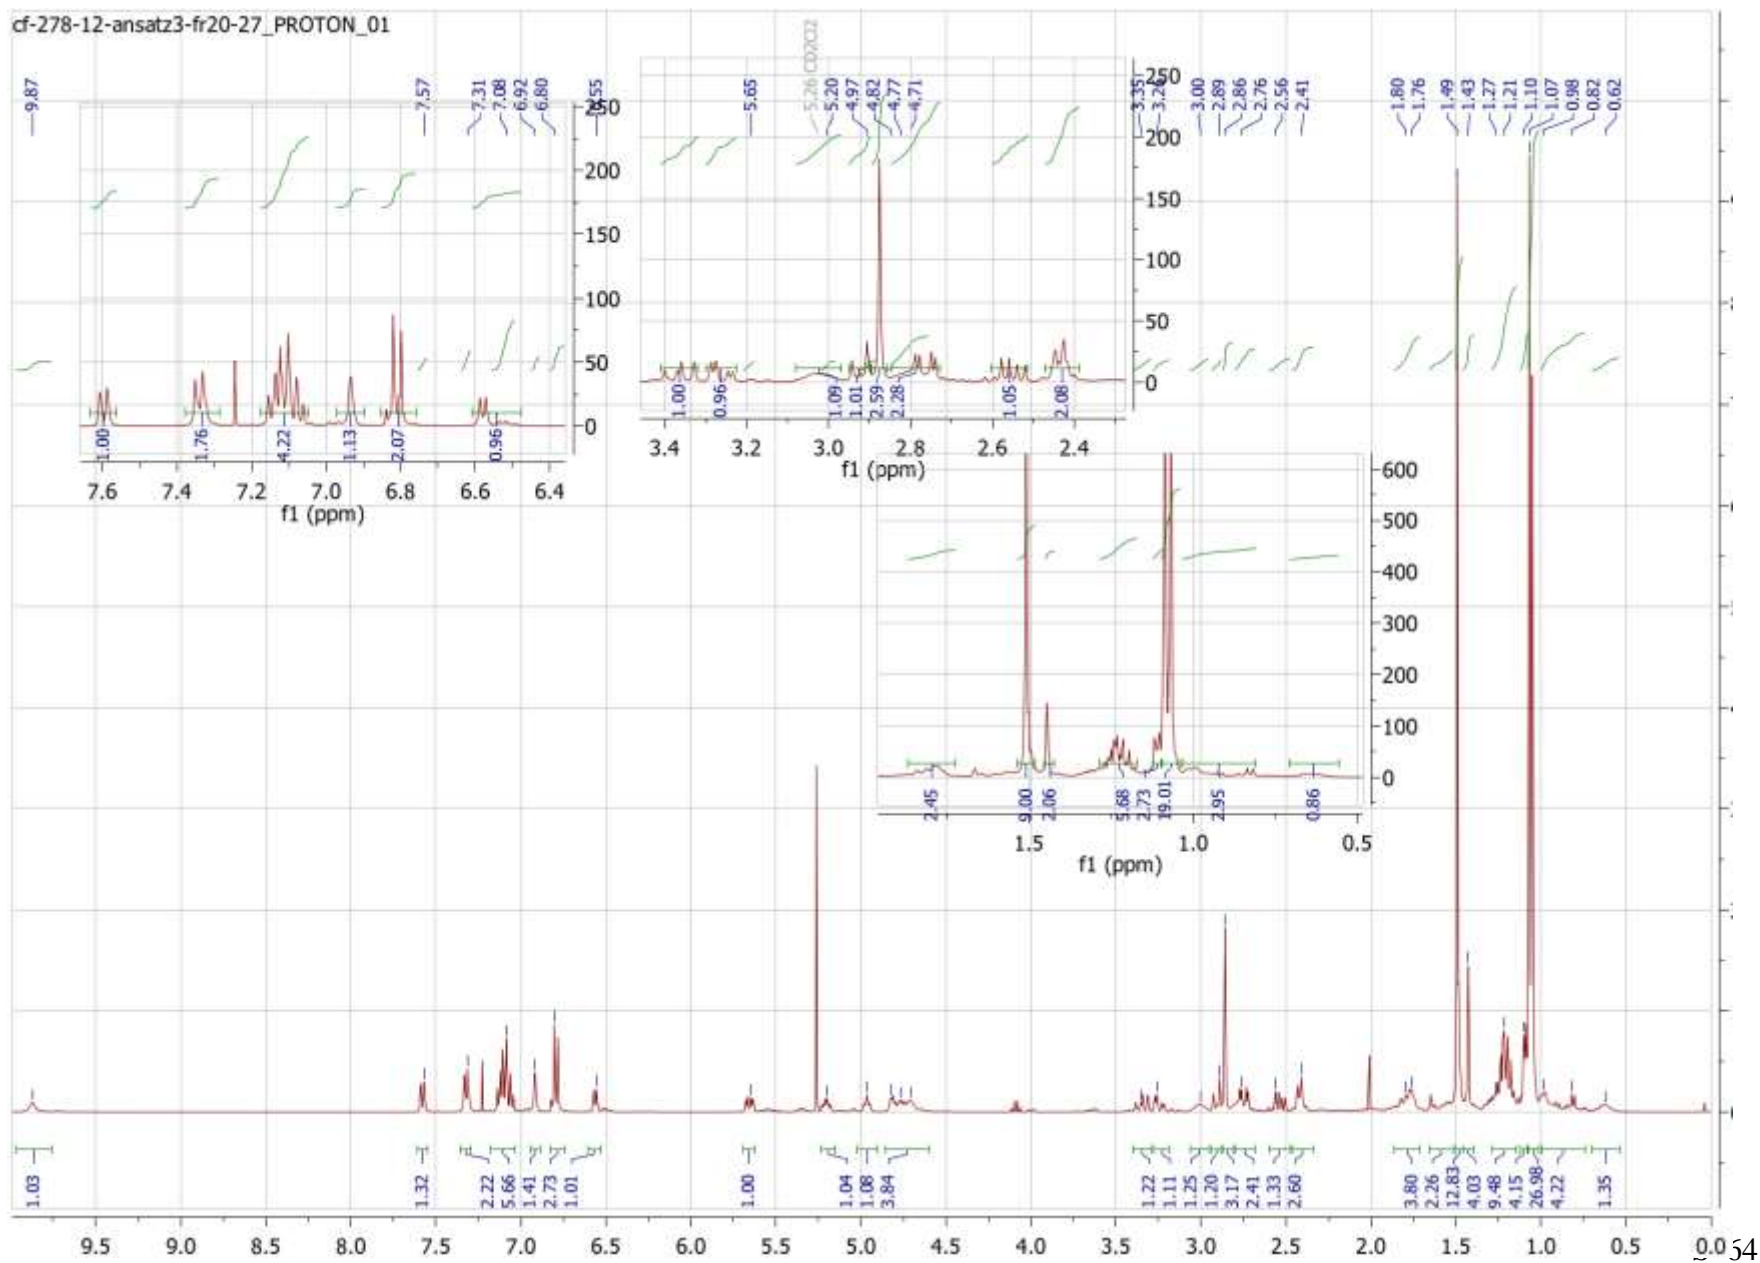



cf-278-12-ansatz3-fr20-27 CARBON\_01

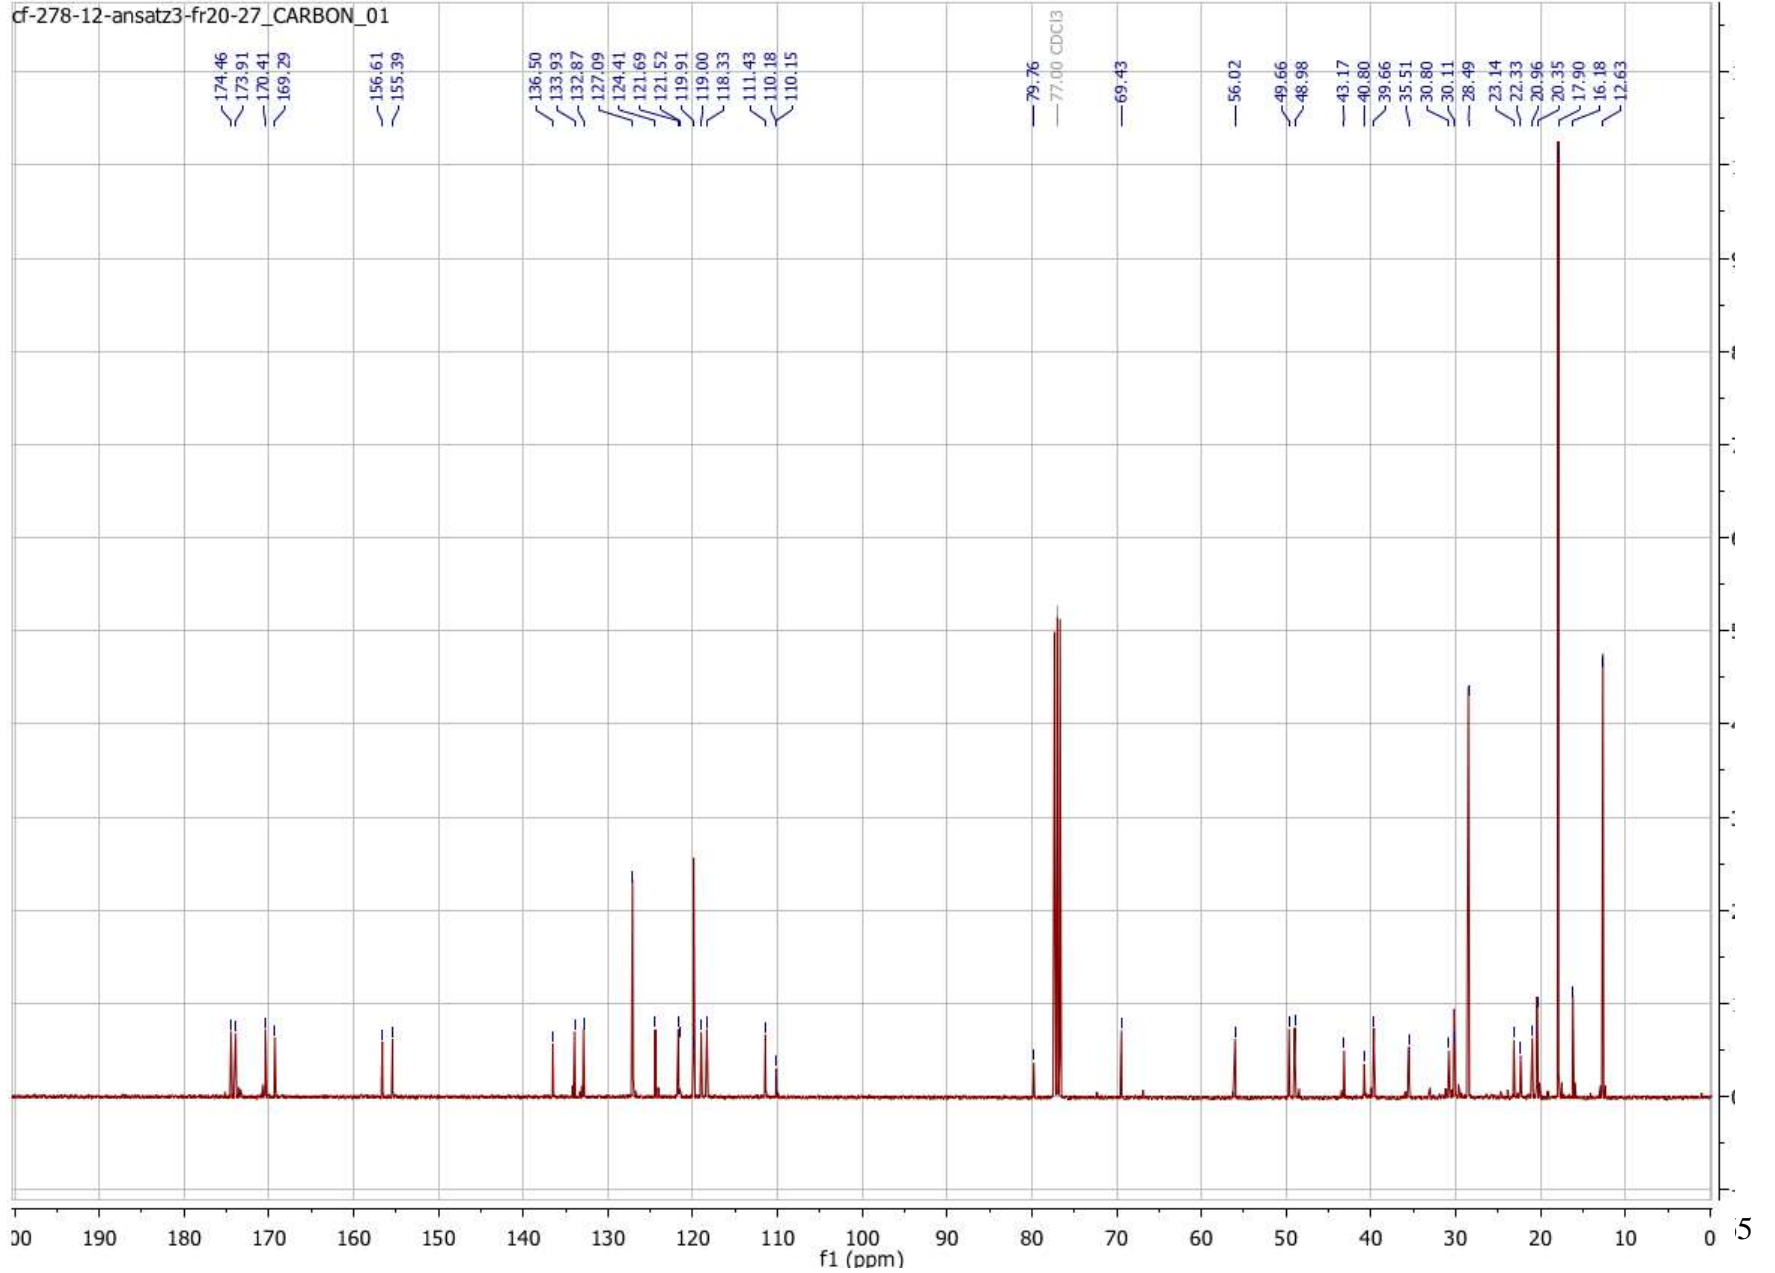

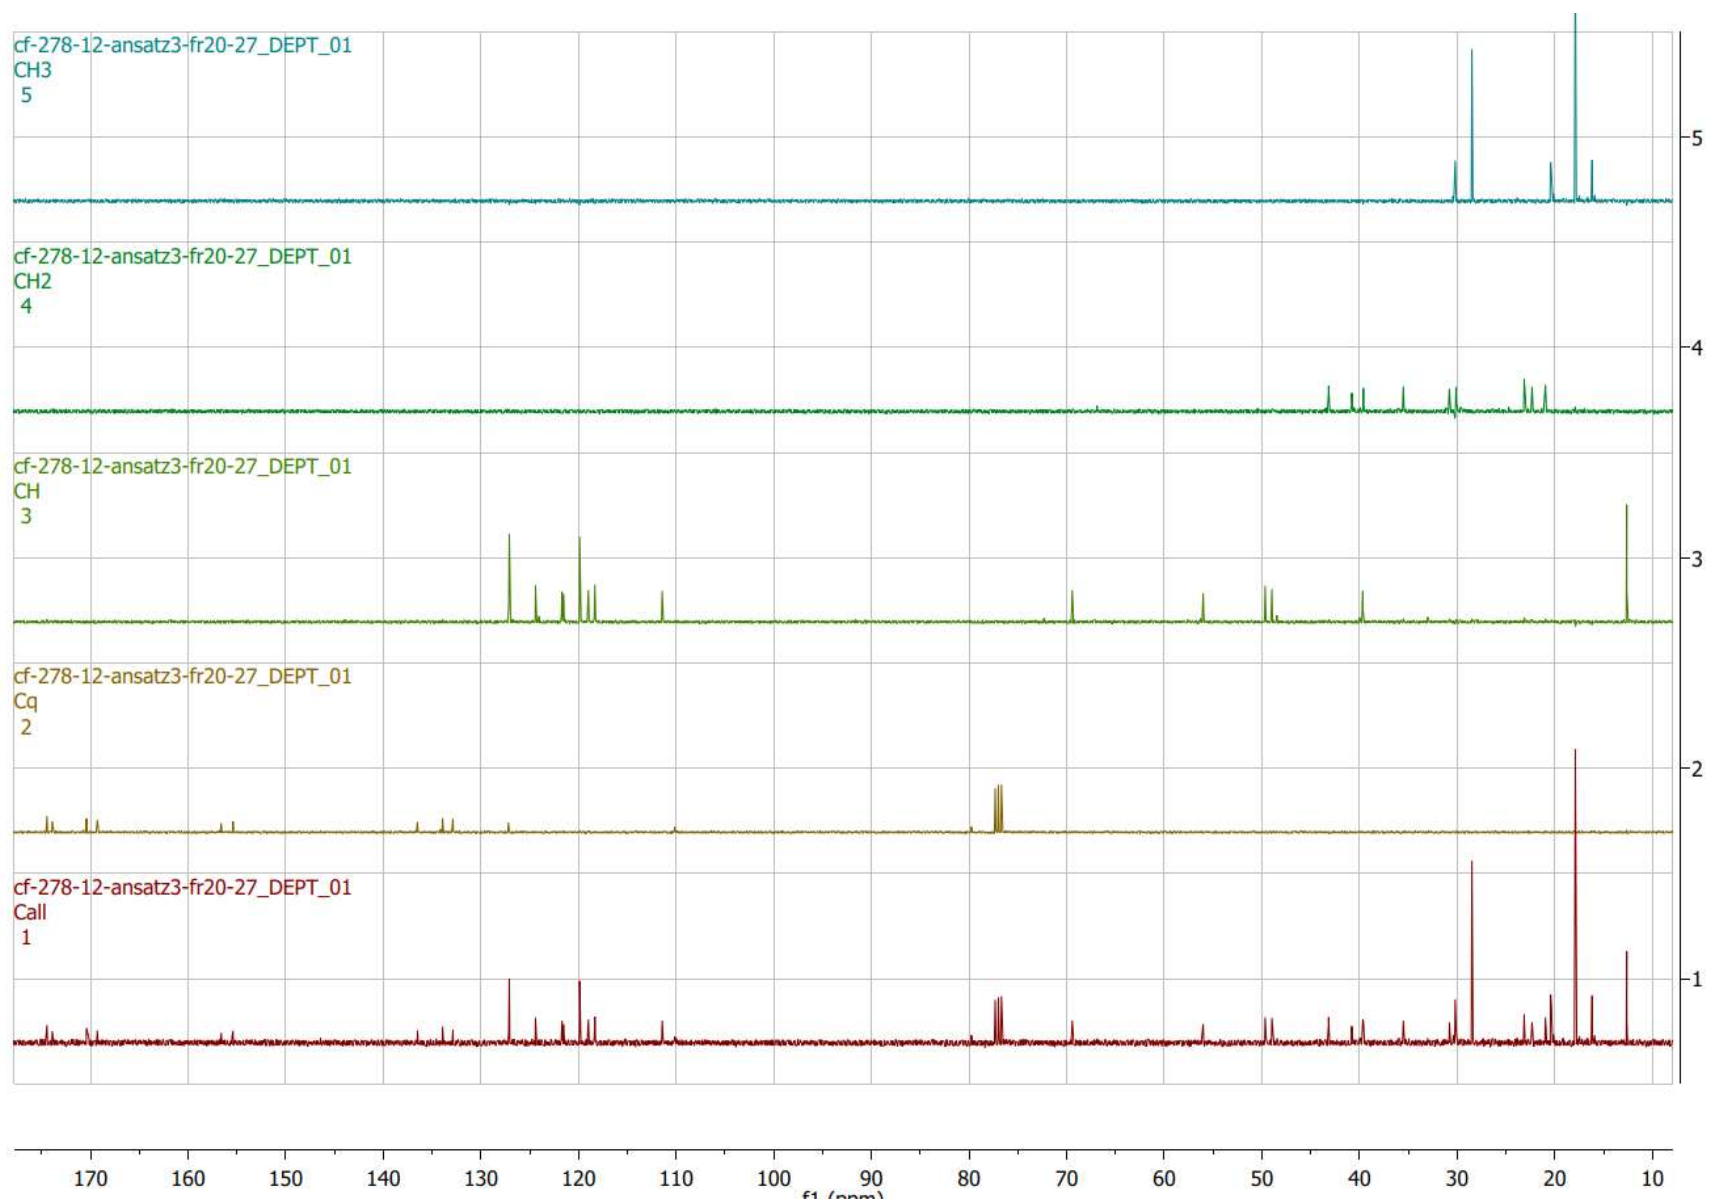





Figures S12a,b.  $^1\text{H}$  (600 MHz) and  $^{13}\text{C}\{^1\text{H}\}$  NMR (125 MHz) spectra of compound 7-H in  $\text{CDCl}_3$ .

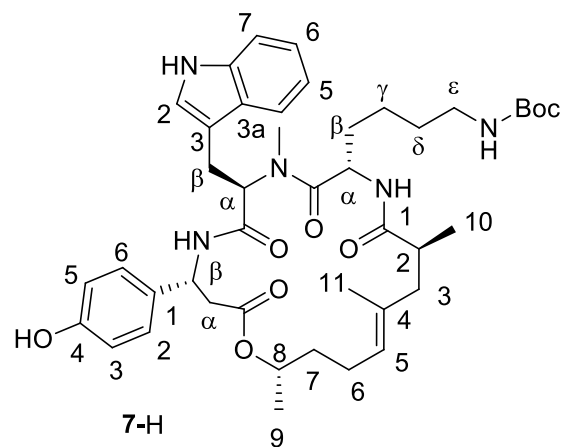

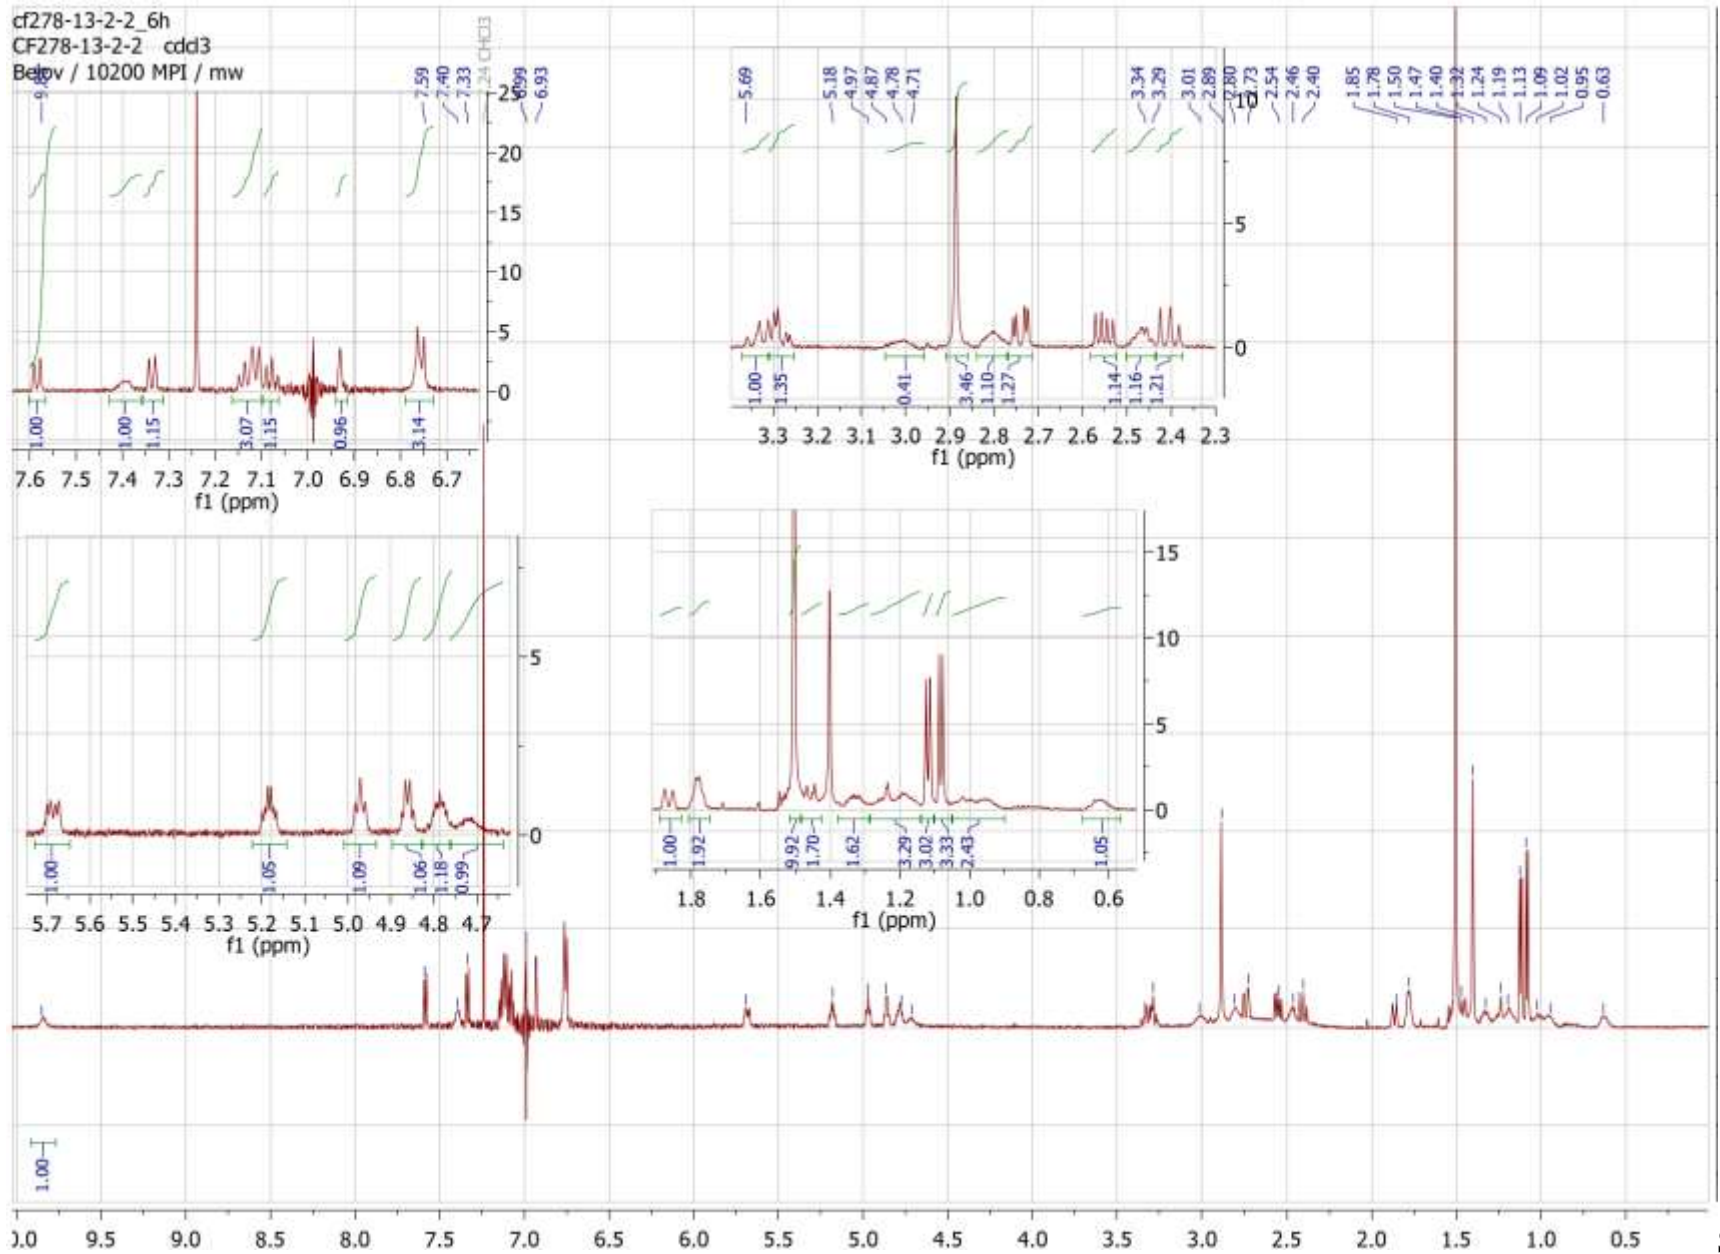

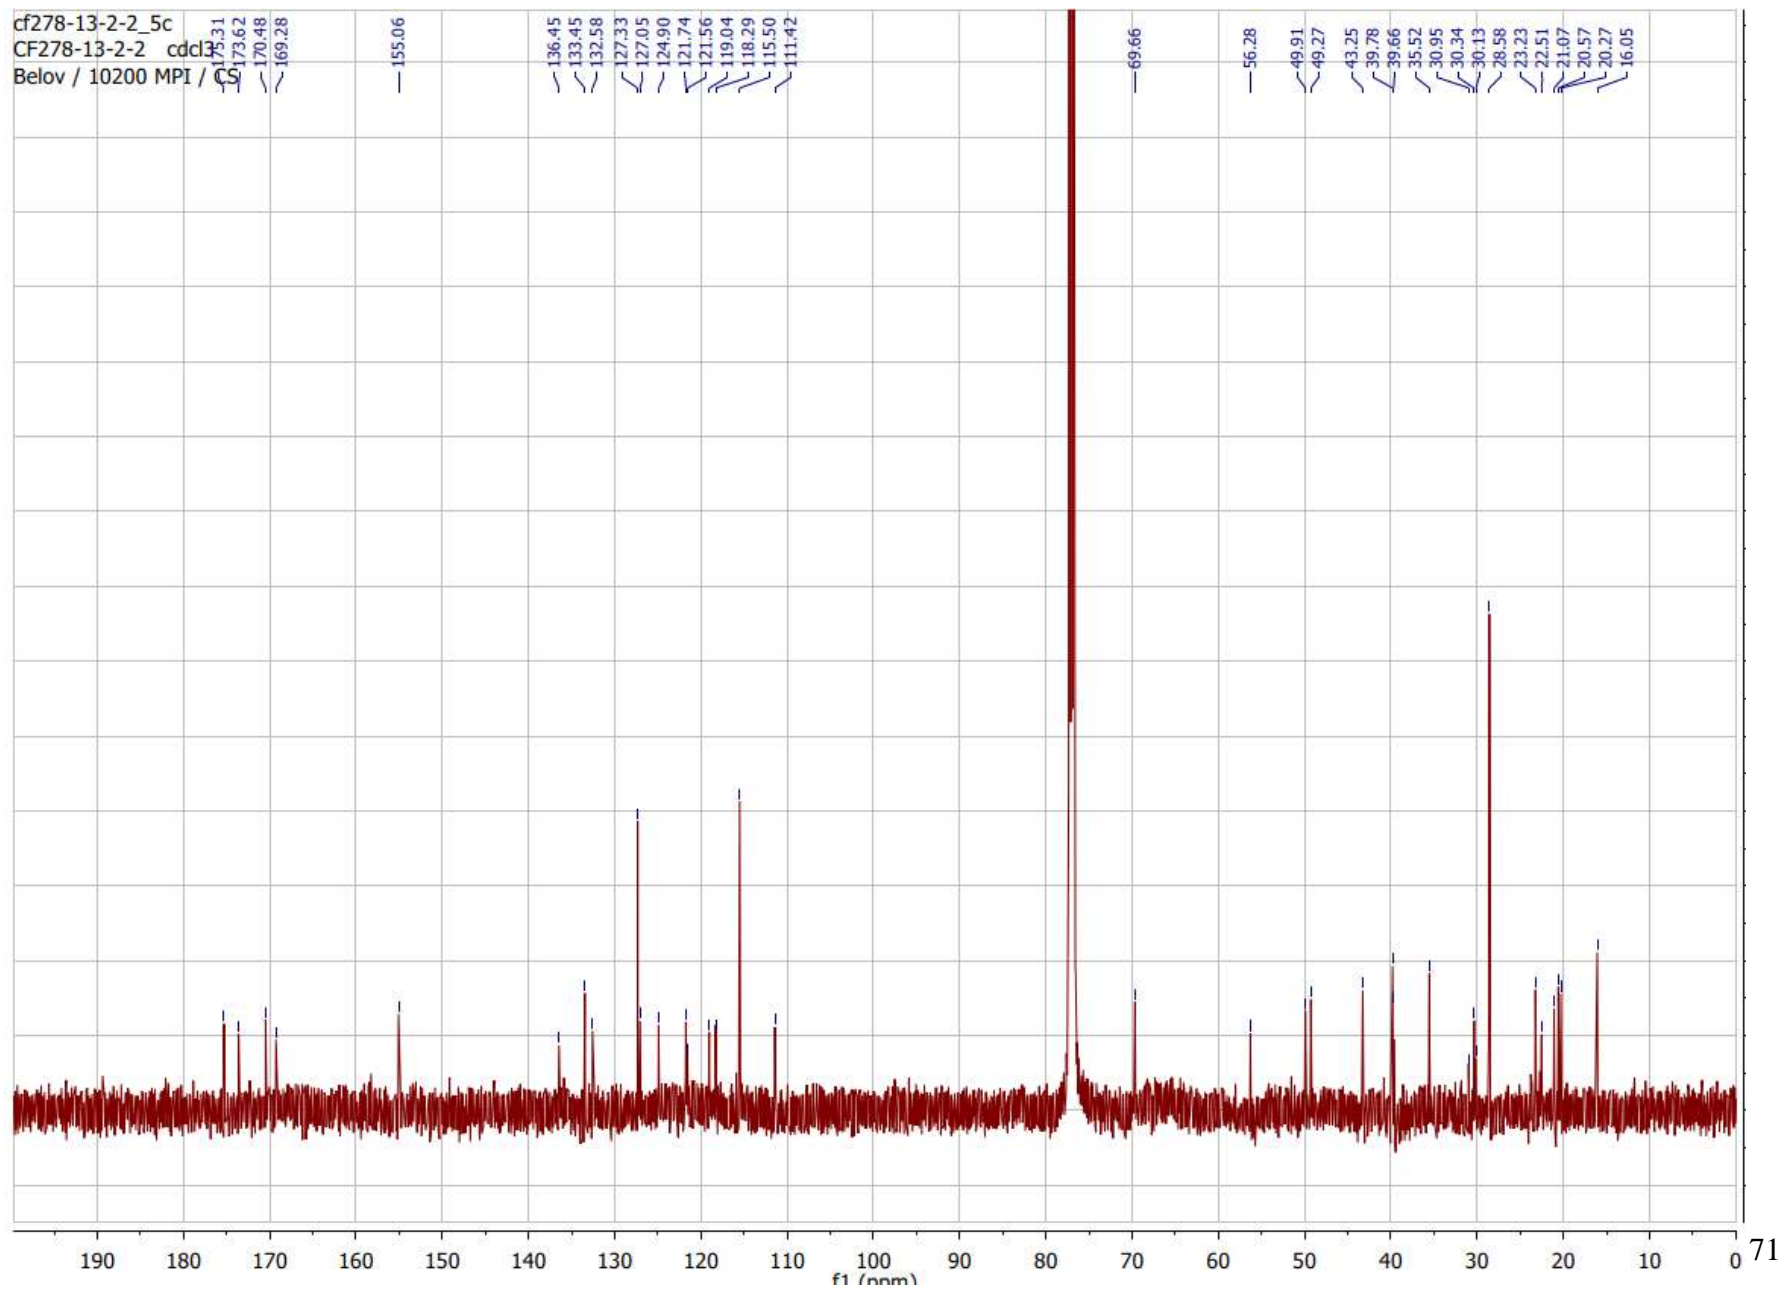

**Figures S13a-d.**  $^1\text{H}$  (400 MHz),  $^{13}\text{C}\{^1\text{H}\}$  NMR (101 MHz), APT (101 MHz),  $^1\text{H}$ - $^1\text{H}$  (600 MHz) and  $^1\text{H}$ - $^{13}\text{C}$ - (HSQC, 400 MHz) spectra of compound **8-H** in  $\text{CDCl}_3$ .

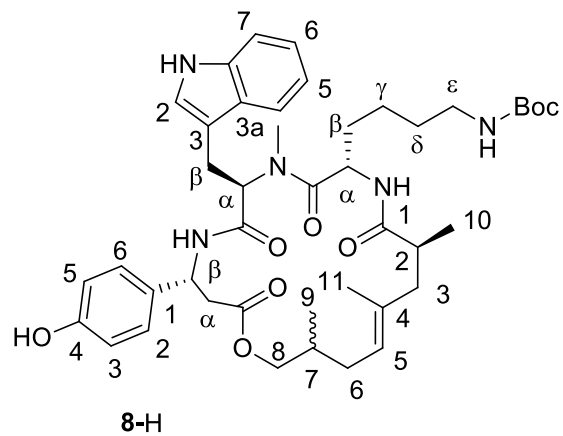



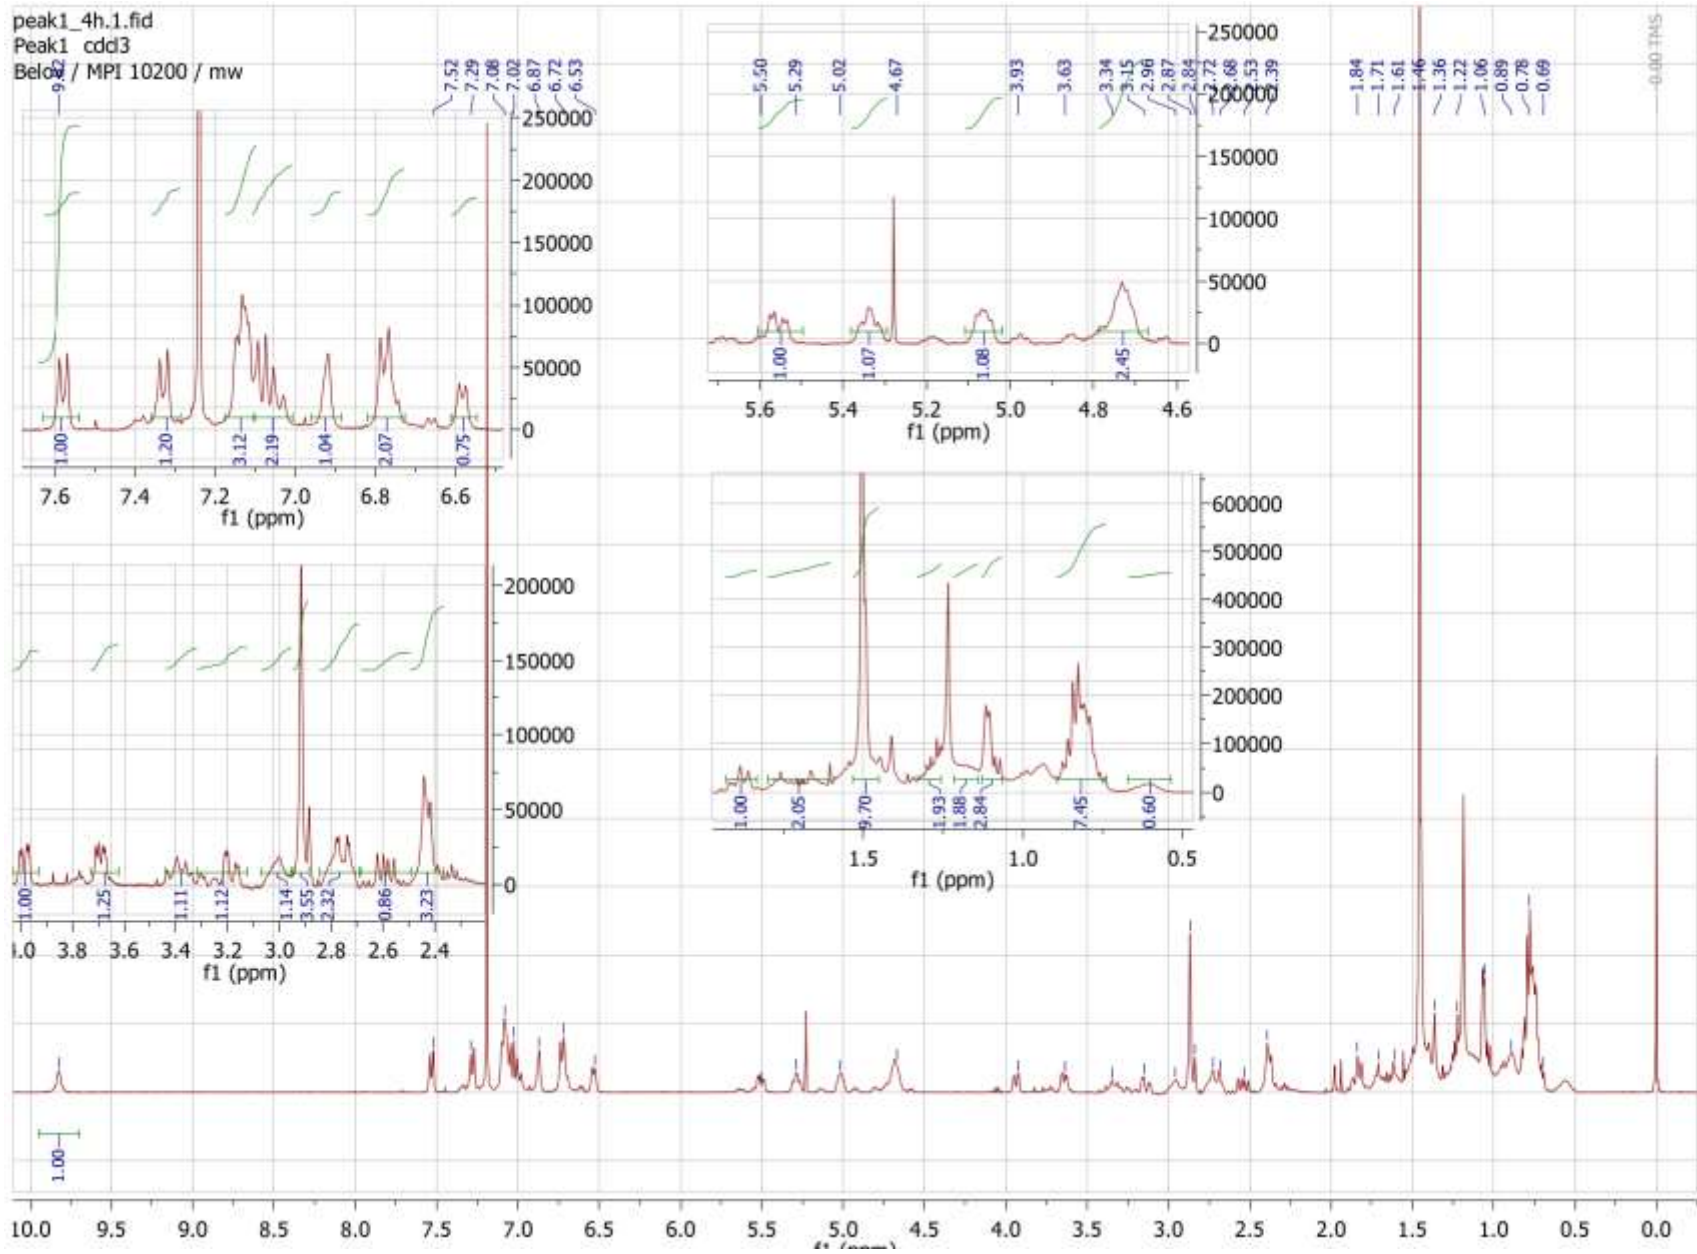

<sup>1</sup>H NMR (400 MHz, Chloroform-*d*) δ 7.58 (d, *J* = 7.8 Hz, 1H), 7.33 (d, *J* = 8.0 Hz, 2H), 7.22 – 6.99 (m, 6H), 6.93 (s, 1H), 6.79 (d, *J* = 8.4 Hz, 3H), 6.60 (d, *J* = 6.7 Hz, 1H), 5.55 (dd, *J* = 12.2, 4.4 Hz, 1H), 5.38 – 5.31 (m, 1H), 5.06 (d, *J* = 9.5 Hz, 1H), 4.73 (s, 3H), 3.99 (dd, *J* = 10.6, 3.5 Hz, 1H), 3.70 (dd, *J* = 10.6, 4.2 Hz, 1H), 3.39 (d, *J* = 13.6 Hz, 1H), 3.18 (dd, *J* = 16.4, 4.5 Hz, 1H), 3.01 (s, 1H), 2.92 (s, 3H), 2.88 (s, 1H), 2.82 – 2.71 (m, 3H), 2.59 (dd, *J* = 16.3, 9.5 Hz, 1H), 2.49 – 2.39 (m, 3H), 1.88 (d, *J* = 10.0 Hz, 9H), 1.50 (d, *J* = 5.1 Hz, 16H), 1.42 (s, 2H), 1.24 (d, *J* = 2.2 Hz, 3H), 1.13 – 1.07 (m, 5H), 0.94 (s, 3H), 0.84 (d, *J* = 6.7 Hz, 3H), 0.76 (d, *J* = 6.2 Hz, 1H).

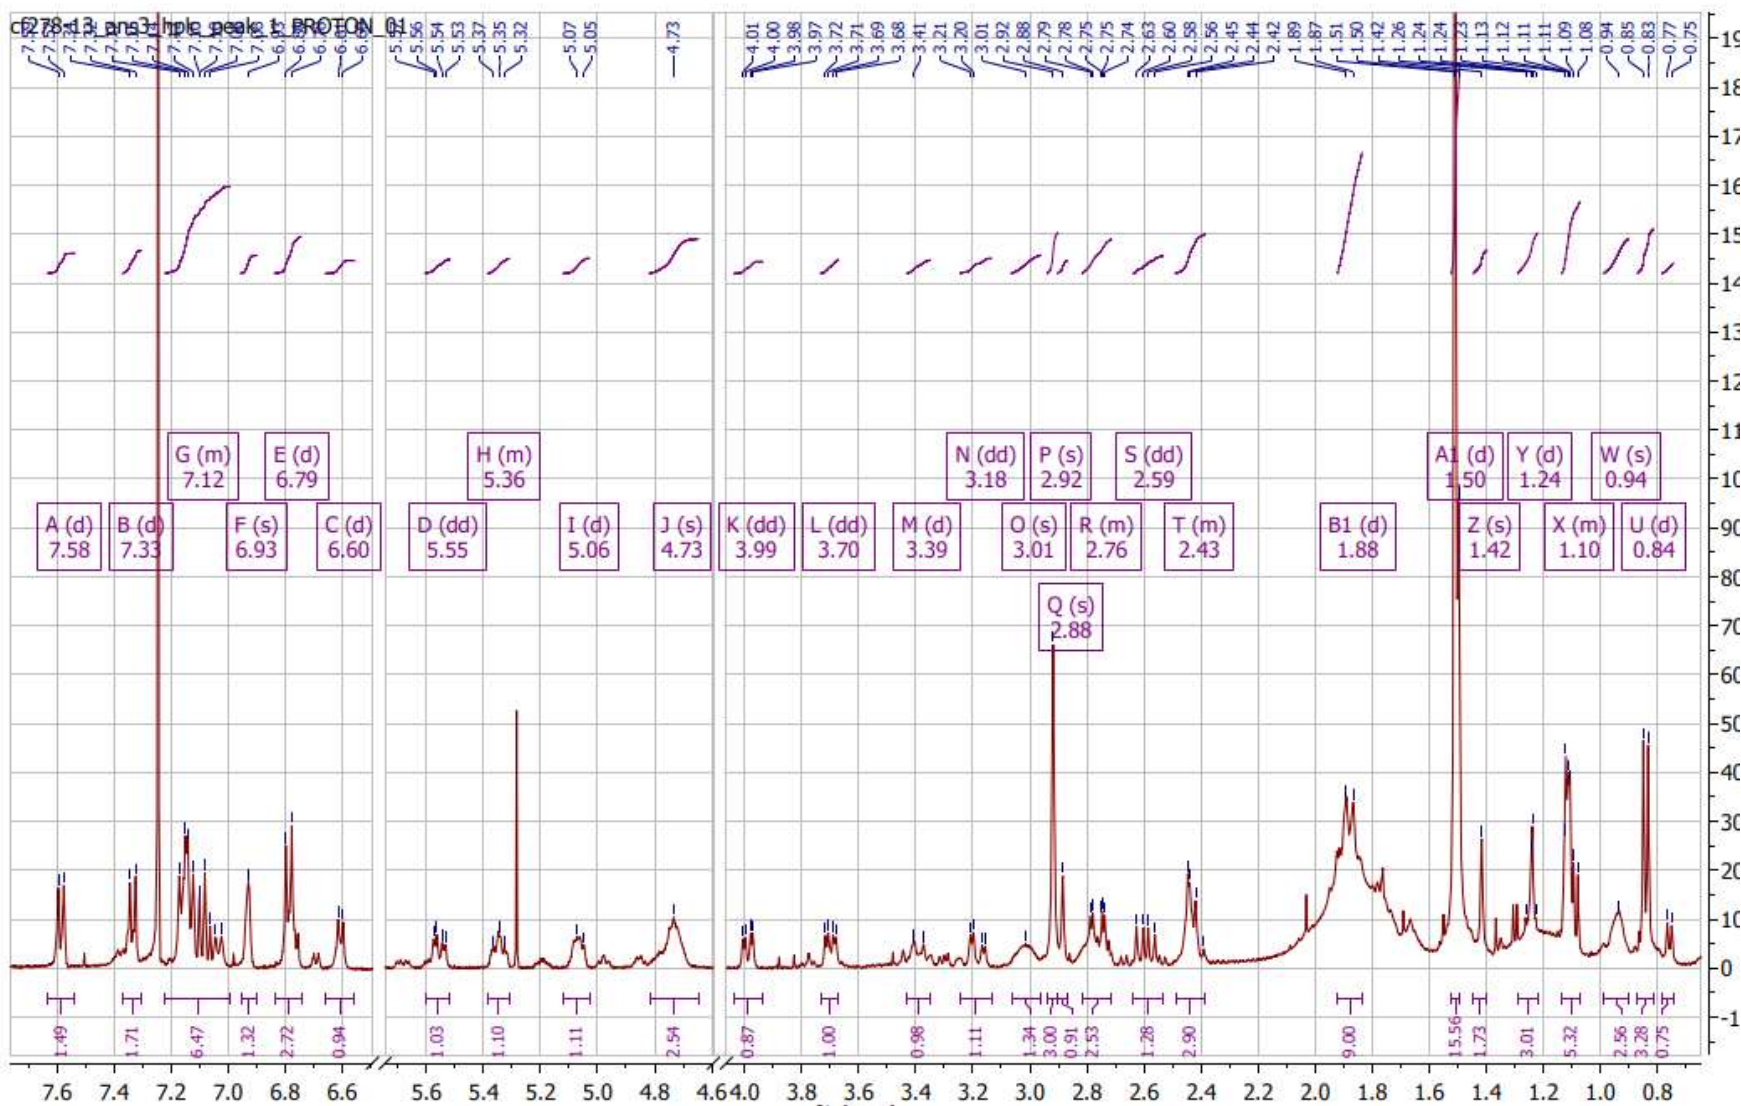

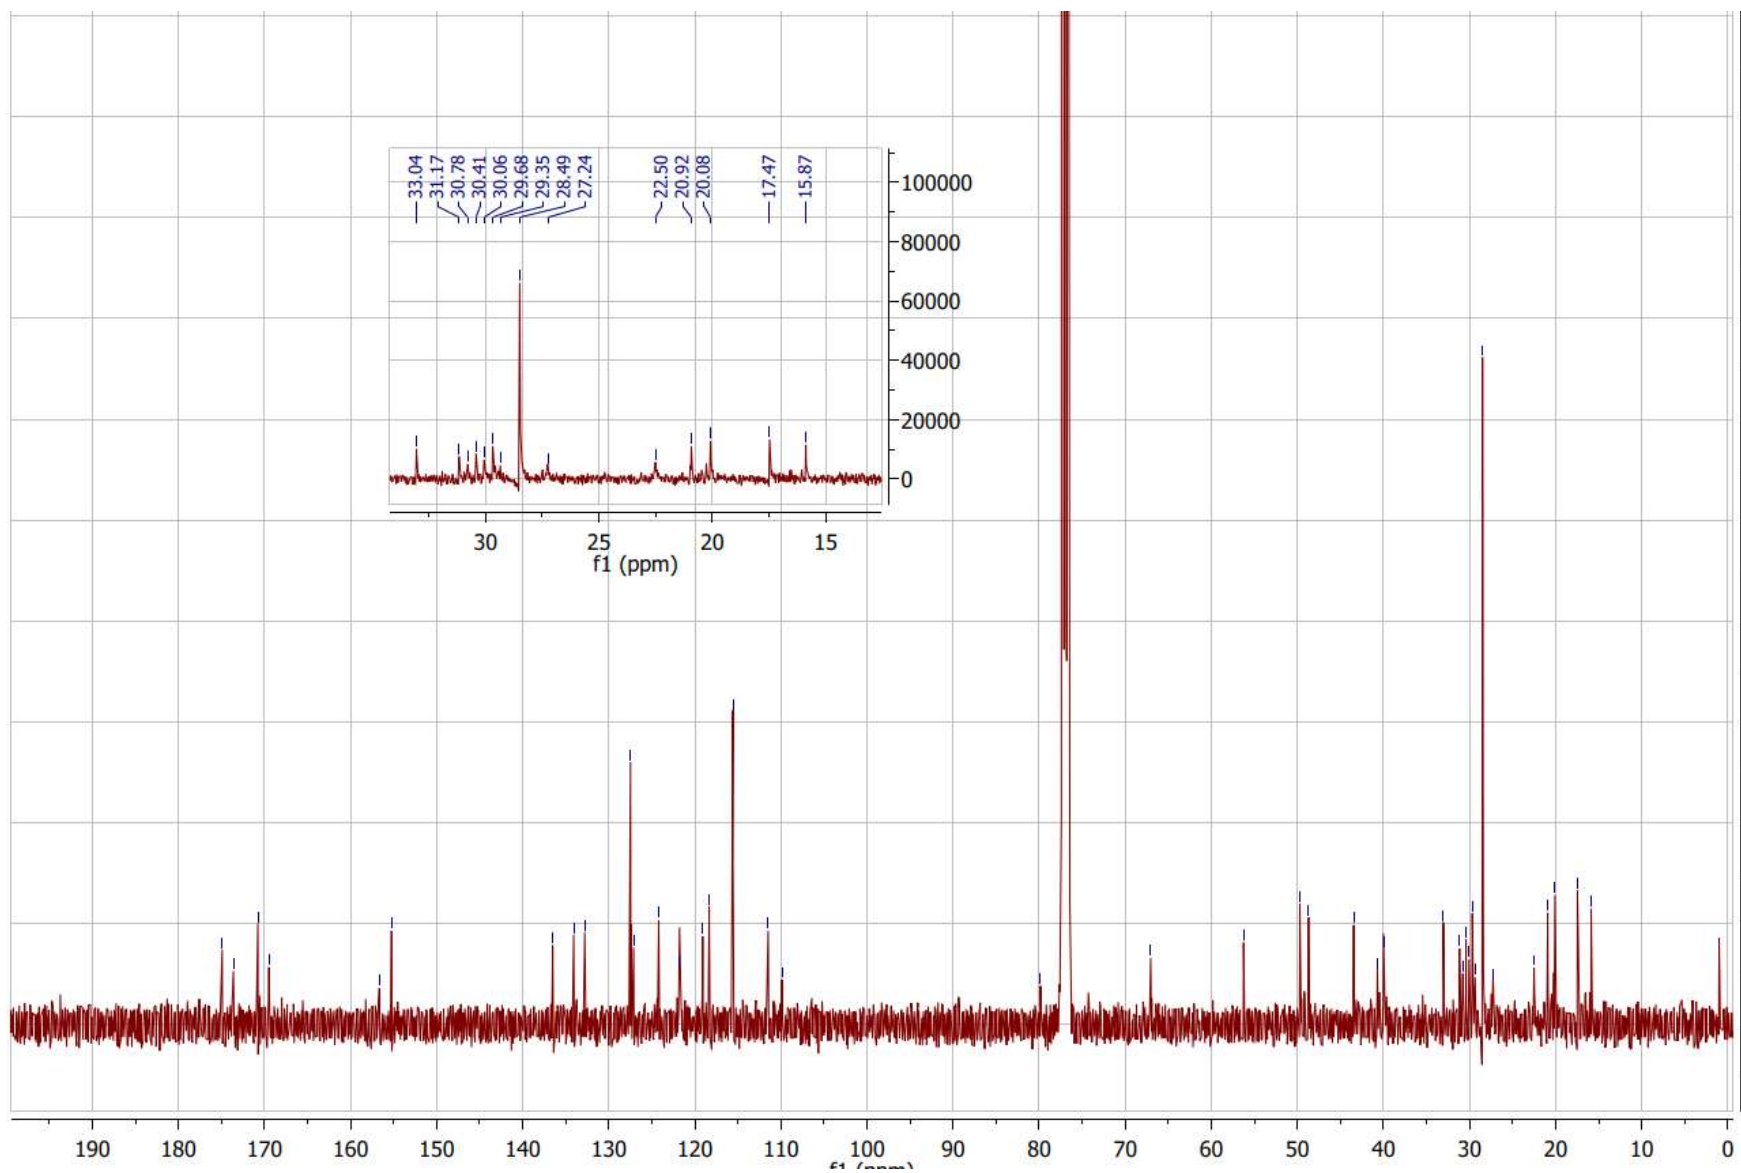

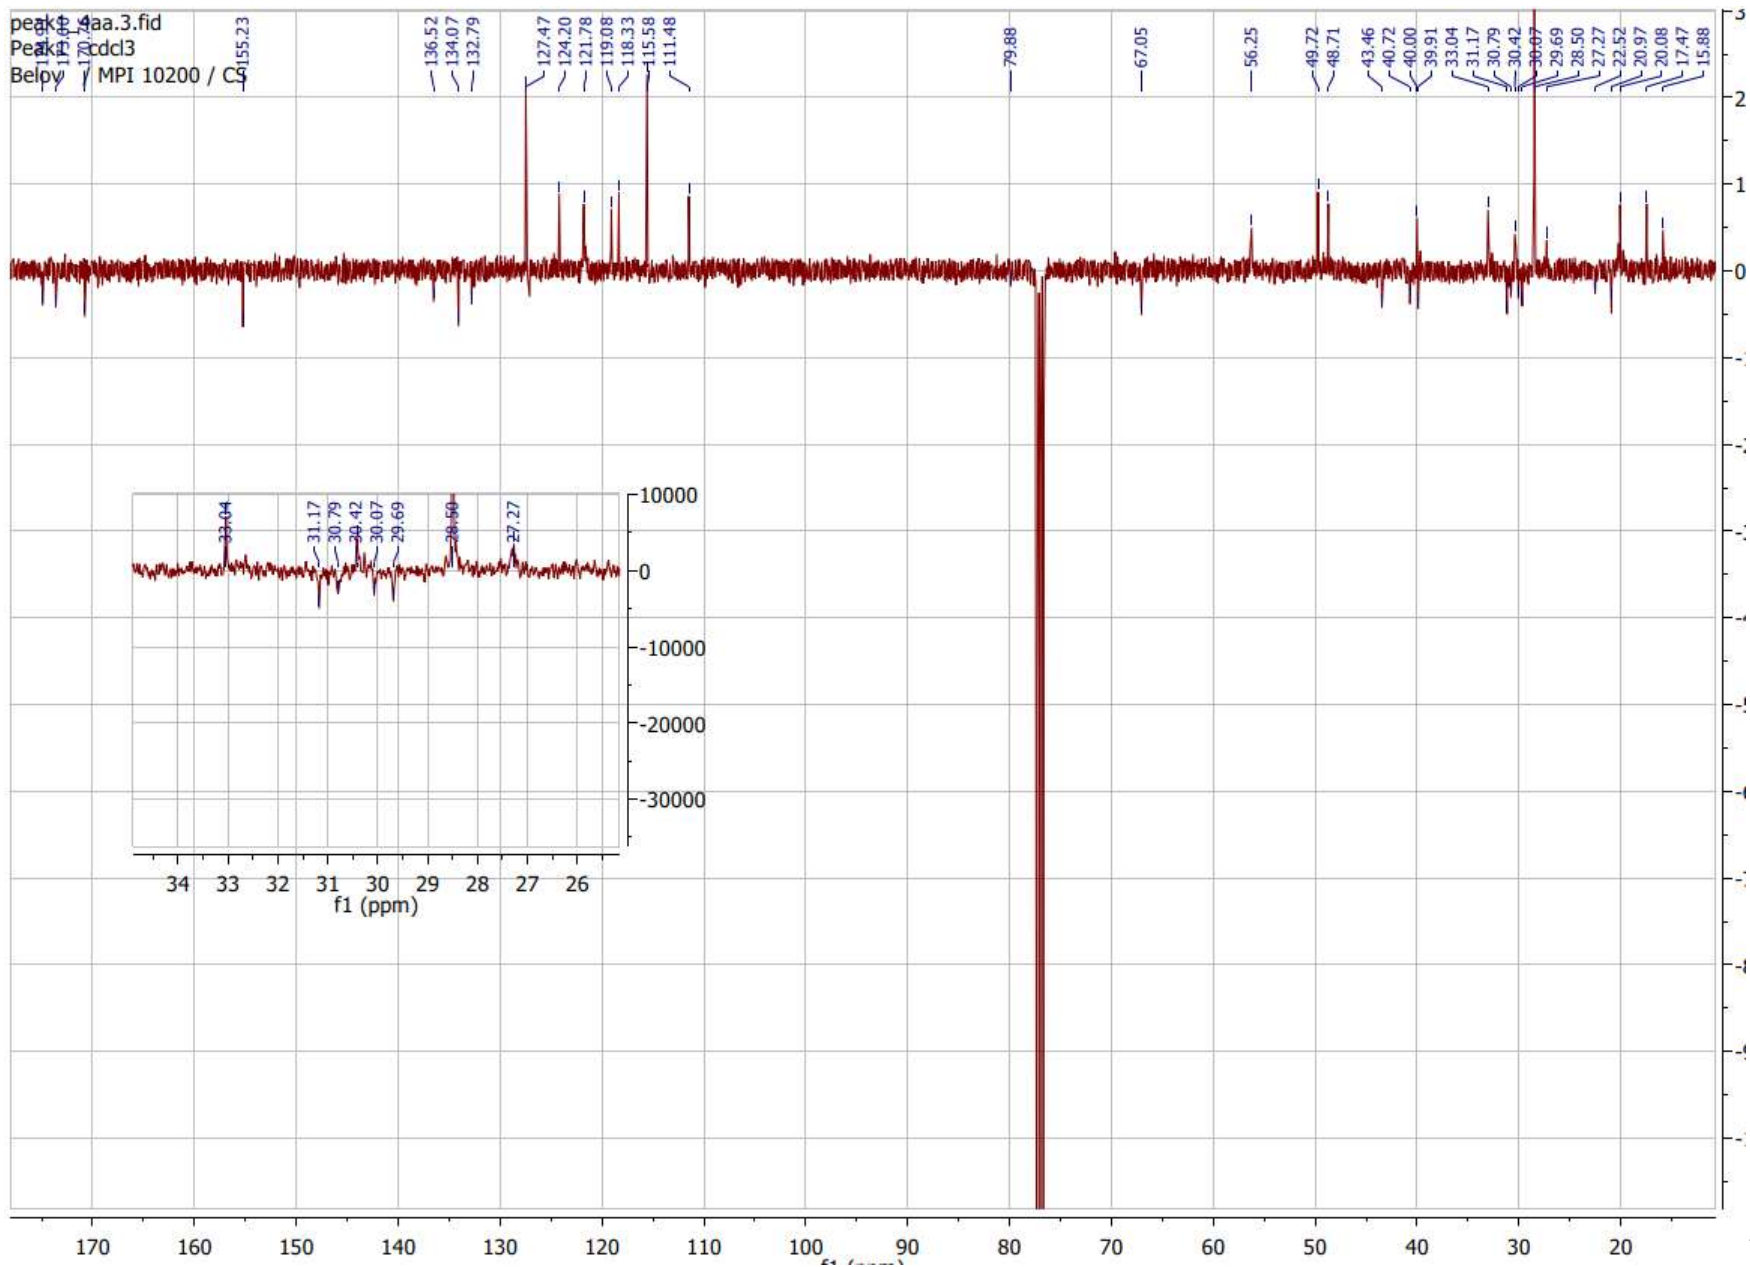

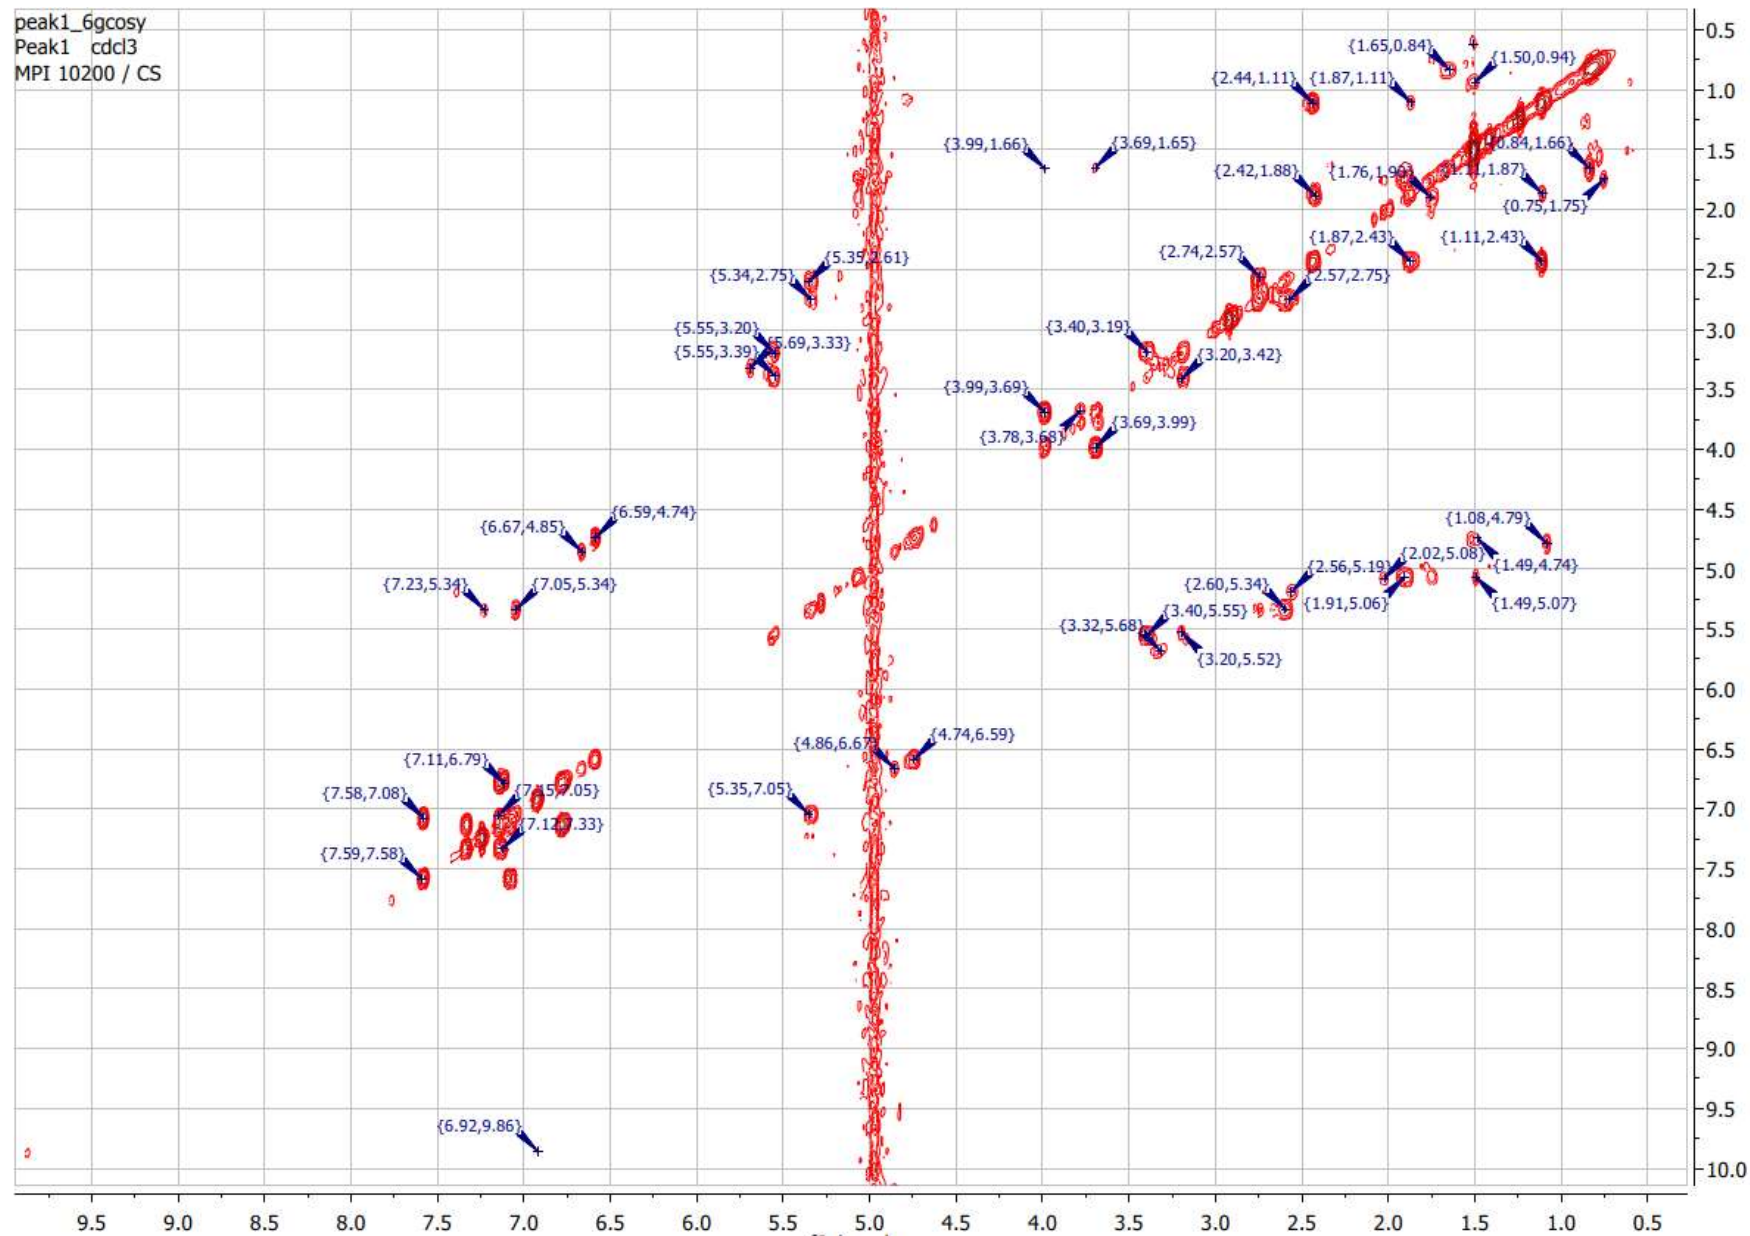

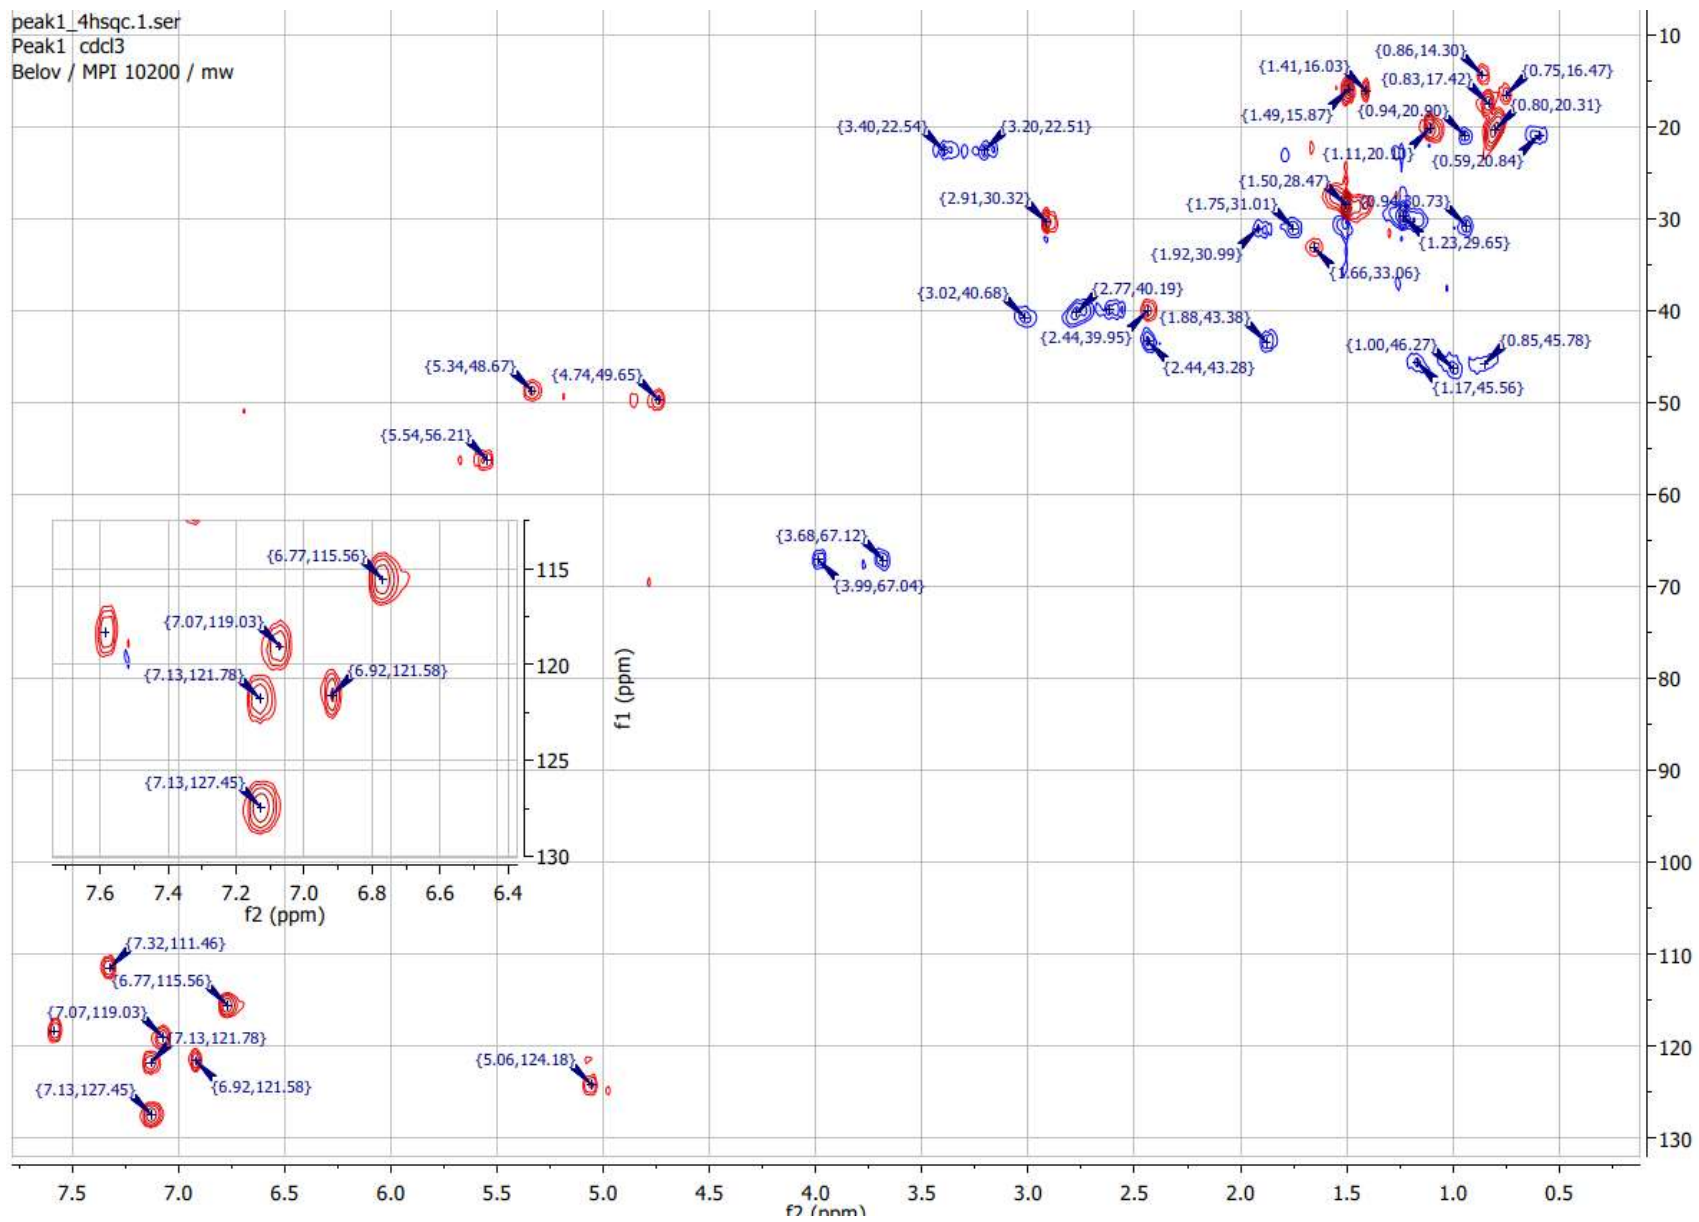

Supplement: jo0c00653_si_001.pdf [file jo0c00653_si_001.pdf]
